# Supplementary material for: Beyond the triple bond: unlocking dinitrogen activation with tailored superbase phosphines
Source: Royal Society of Chemistry journal article supplement (doi:10.1039/d4dt02703e), 2024-01-01
Supplement: d4dt02703e1.pdf [file d4dt02703e1.pdf]

## Beyond the Triple Bond: Unlocking Dinitrogen Activation with Tailored Superbase Phosphines

Vilakkathala U. Krishnapriya<sup>a, b</sup> and Cherumuttathu H. Suresh<sup>\*b, c</sup>

<sup>a</sup>Chemical Science and Technology Division, CSIR-National Institute of Interdisciplinary Science and Technology, Thiruvananthapuram - 695019, Kerala, India

<sup>b</sup>Research Centre, University of Kerala, Thiruvananthapuram, 695034, Kerala, India

<sup>c</sup>Srinivasa Ramanujan Institute for Basic Sciences, Kerala State Council for Science Technology and Environment, Kottayam, 686501, Kerala, India

### Supporting Information

#### Table of Contents

| Sl. No. | Title                                                                                                                                                                                                  | Page No. |
|---------|--------------------------------------------------------------------------------------------------------------------------------------------------------------------------------------------------------|----------|
| 1       | Figure S1: Optimized geometries of phosphine ligands at M06L/6-311++G(d,p) level DFT.                                                                                                                  | S2       |
| 2       | Table S1: Structural and energetic data of the mono-phosphine-N <sub>2</sub> van der Waals complexes at M06L/6-311++G(d,p) level DFT. Energy values in kcal/mol and the distance in Å.                 | S3       |
| 3       | Table S2: Structural and energetic data of the mono-phosphine-N <sub>2</sub> hypervalent complexes at M06L/6-311++G(d,p) level DFT. Energy values in kcal/mol and the distance in Å.                   | S3       |
| 4       | Figure S2: Energy profile diagram for the hydrogen transfer reactions takes place in the dinitrogen complex.                                                                                           | S3       |
| 5       | Table S3: Cartesian coordinates of optimized geometries of phosphines at M06L/6-311++G(d,p) level DFT. Atomic number followed by X, Y, Z coordinates in Å.                                             | S4       |
| 6       | Table S4: Cartesian coordinates of optimized geometries of mono-phosphine-N <sub>2</sub> van der Waals complexes at M06L/6-311++G(d,p) level DFT. Atomic number followed by X, Y, Z coordinates in Å.  | S8       |
| 7       | Table S5: Cartesian coordinates of optimized geometries of mono-phosphine-N <sub>2</sub> hypervalent complexes at M06L/6-311++G(d,p) level DFT. Atomic number followed by X, Y, Z coordinates in Å.    | S13      |
| 8       | Table S6: Cartesian coordinates of optimized geometries of bis-phosphine-N <sub>2</sub> complexes at M06L/6-311++G(d,p) level DFT. Atomic number followed by X, Y, Z coordinates in Å.                 | S15      |
| 9       | Table S7: Cartesian coordinates of optimized geometries of transition states for the activation of N <sub>2</sub> at M06L/6-311++G(d,p) level DFT. Atomic number followed by X, Y, Z coordinates in Å. | S24      |
| 10      | Table S8: Cartesian coordinates of optimized geometries of products for the activation of N <sub>2</sub> at M06L/6-311++G(d,p) level DFT. Atomic number followed by X, Y, Z coordinates in Å.          | S27      |

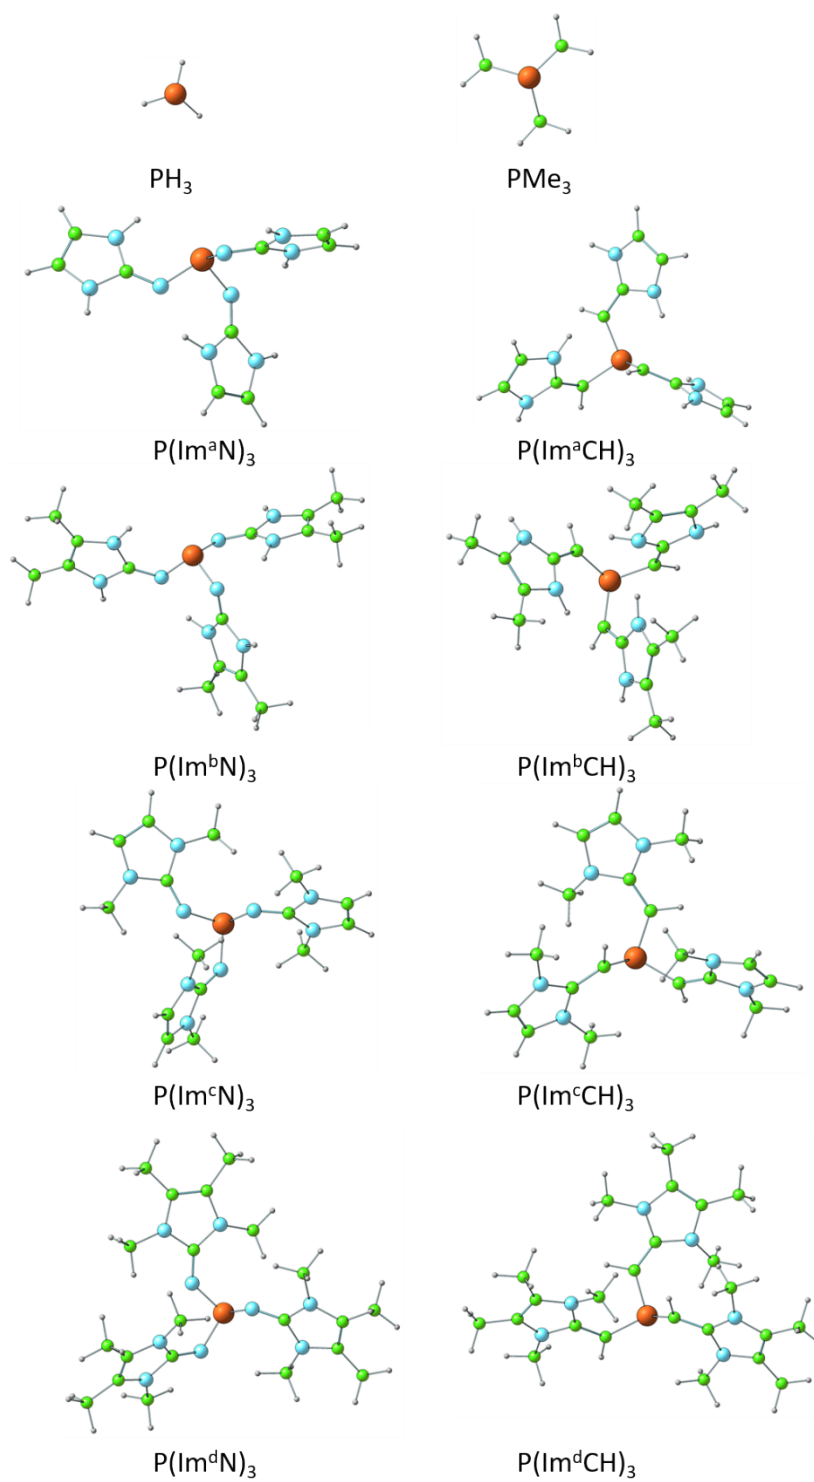

**Figure S1:** Optimized geometries of phosphine ligands at M06L/6-311++G(d,p) level DFT.

**Table S1:** Structural and energetic data of the mono-phosphine-N<sub>2</sub> van der Waals complexes at M06L/6-311++G(d,p) level DFT. Energy values in kcal/mol and the distance in Å.

| Complex                                            | $\Delta E$ | $\Delta G$ | $D_{P-N}$ |
|----------------------------------------------------|------------|------------|-----------|
| PH <sub>3</sub> ⋯N <sub>2</sub>                    | -0.6       | 6.2        | 4.03      |
| PMe <sub>3</sub> ⋯N <sub>2</sub>                   | -1.4       | 4.5        | 3.44      |
| P(Im <sup>a</sup> N) <sub>3</sub> ⋯N <sub>2</sub>  | -2.8       | 5.6        | 3.94      |
| P(Im <sup>b</sup> N) <sub>3</sub> ⋯N <sub>2</sub>  | -7.1       | 0.5        | 4.37      |
| P(Im <sup>c</sup> N) <sub>3</sub> ⋯N <sub>2</sub>  | -4.5       | 4.2        | 3.61      |
| P(Im <sup>d</sup> N) <sub>3</sub> ⋯N <sub>2</sub>  | -5.0       | 3.6        | 4.32      |
| P(Im <sup>a</sup> CH) <sub>3</sub> ⋯N <sub>2</sub> | -2.2       | 3.2        | 3.83      |
| P(Im <sup>b</sup> CH) <sub>3</sub> ⋯N <sub>2</sub> | -3.0       | 4.7        | 4.25      |
| P(Im <sup>c</sup> CH) <sub>3</sub> ⋯N <sub>2</sub> | -3.4       | 3.4        | 3.86      |
| P(Im <sup>d</sup> CH) <sub>3</sub> ⋯N <sub>2</sub> | -4.2       | 4.2        | 4.43      |

**Table S2:** Structural and energetic data of the mono-phosphine-N<sub>2</sub> van der Waals complexes at M06L/6-311++G(d,p) level DFT. Energy values in kcal/mol and the distance in Å.

| Complex                                           | $\Delta E$ | $\Delta G$ | $D_{P-N1}$ | $D_{P-N2}$ | $D_{N-N}$ |
|---------------------------------------------------|------------|------------|------------|------------|-----------|
| (Im <sup>c</sup> N) <sub>3</sub> P-N <sub>2</sub> | 70.1       | 83.5       | 1.72       | 1.82       | 1.29      |
| (Im <sup>d</sup> N) <sub>3</sub> P-N <sub>2</sub> | 65.9       | 79.6       | 1.72       | 1.85       | 1.28      |

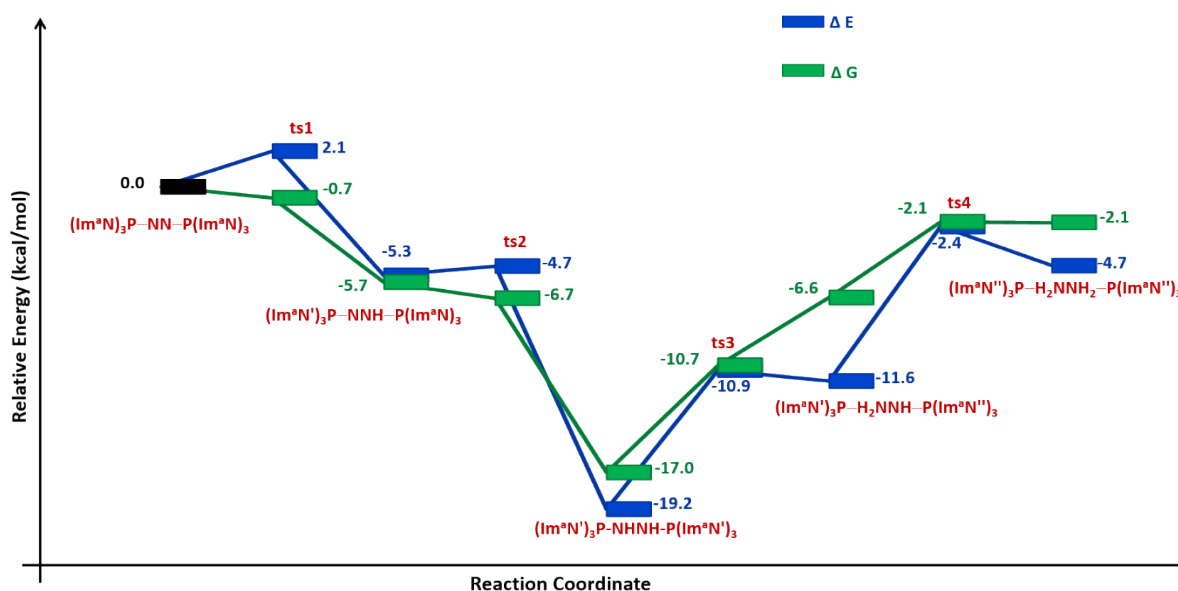

**Figure S2:** Energy profile diagram for the hydrogen transfer reactions takes place in the dinitrogen complex (without solvent).

**Table S3:** Cartesian coordinates of optimized geometries of phosphines at M06L/6-311++G(d,p) level DFT. Atomic number followed by X, Y, Z coordinates in Å.

|                                       |              |              |              |                                       |              |              |              |
|---------------------------------------|--------------|--------------|--------------|---------------------------------------|--------------|--------------|--------------|
| <b>PH<sub>3</sub></b>                 |              |              |              | <b>PMe<sub>3</sub></b>                |              |              |              |
| 15                                    | -0.000044000 | 0.000128000  | -0.129701000 | 15                                    | -0.000058000 | -0.000015000 | -0.611832000 |
| 1                                     | 0.253718000  | -1.157637000 | 0.647618000  | 6                                     | -1.552395000 | -0.446479000 | 0.281520000  |
| 1                                     | 0.876324000  | 0.797204000  | 0.648859000  | 1                                     | -1.868863000 | -1.453558000 | 0.000716000  |
| 1                                     | -1.129389000 | 0.358508000  | 0.649030000  | 1                                     | -2.355858000 | 0.237982000  | 0.000102000  |
|                                       |              |              |              | 1                                     | -1.431860000 | -0.411294000 | 1.369547000  |
|                                       |              |              |              | 6                                     | 1.162910000  | -1.121158000 | 0.281480000  |
|                                       |              |              |              | 1                                     | 1.072025000  | -1.034533000 | 1.369500000  |
|                                       |              |              |              | 1                                     | 2.193294000  | -0.891264000 | 0.000951000  |
|                                       |              |              |              | 1                                     | 0.972244000  | -2.159142000 | -0.000274000 |
|                                       |              |              |              | 6                                     | 0.389568000  | 1.567625000  | 0.281445000  |
|                                       |              |              |              | 1                                     | 0.358811000  | 1.445928000  | 1.369484000  |
|                                       |              |              |              | 1                                     | -0.323832000 | 2.345502000  | 0.000029000  |
|                                       |              |              |              | 1                                     | 1.384413000  | 1.920685000  | 0.000743000  |
| <b>P(Im<sup>a</sup>N)<sub>3</sub></b> |              |              |              | <b>P(Im<sup>b</sup>N)<sub>3</sub></b> |              |              |              |
| 15                                    | -0.287865000 | 0.682155000  | -0.648227000 | 15                                    | -0.361319000 | -0.851729000 | -0.640124000 |
| 7                                     | 0.710112000  | 1.336270000  | 0.575360000  | 7                                     | 0.613396000  | -1.424519000 | 0.642747000  |
| 7                                     | 2.772503000  | 1.110467000  | -0.703466000 | 7                                     | 2.676585000  | -1.416033000 | -0.651518000 |
| 7                                     | 2.832670000  | 2.232122000  | 1.157862000  | 7                                     | 2.700208000  | -2.342451000 | 1.310738000  |
| 7                                     | -1.504674000 | -0.005829000 | 0.391482000  | 6                                     | 1.856637000  | -1.689755000 | 0.430988000  |
| 7                                     | -3.831376000 | -0.051133000 | 0.881398000  | 6                                     | 3.994995000  | -1.800931000 | -0.395312000 |
| 7                                     | -3.256007000 | 1.249829000  | -0.749769000 | 6                                     | 4.009832000  | -2.388771000 | 0.825477000  |
| 6                                     | 1.962744000  | 1.526875000  | 0.343751000  | 1                                     | 2.349074000  | -0.757041000 | -1.352252000 |
| 6                                     | 4.089884000  | 1.493268000  | -0.492548000 | 1                                     | 2.388947000  | -2.636154000 | 2.220504000  |
| 1                                     | 4.877437000  | 1.257159000  | -1.187255000 | 6                                     | 5.099257000  | -3.032754000 | 1.590115000  |
| 6                                     | 4.126972000  | 2.199141000  | 0.656929000  | 1                                     | 6.043796000  | -2.960744000 | 1.049480000  |
| 1                                     | 4.946901000  | 2.693568000  | 1.147847000  | 1                                     | 5.246083000  | -2.563973000 | 2.570105000  |
| 6                                     | -2.722824000 | 0.371668000  | 0.175171000  | 1                                     | 4.903926000  | -4.096400000 | 1.770226000  |
| 6                                     | -4.991014000 | 0.558927000  | 0.416061000  | 6                                     | 5.071162000  | -1.588344000 | -1.387371000 |
| 1                                     | -5.957141000 | 0.360793000  | 0.845044000  | 1                                     | 4.864033000  | -2.105294000 | -2.331140000 |
| 6                                     | -4.630218000 | 1.364723000  | -0.602780000 | 1                                     | 5.202748000  | -0.526875000 | -1.627362000 |
| 1                                     | -5.225124000 | 2.002334000  | -1.233239000 | 1                                     | 6.025449000  | -1.958661000 | -1.010093000 |
| 1                                     | 2.413789000  | 0.416815000  | -1.352582000 | 7                                     | 0.565928000  | 0.412383000  | -1.344444000 |
| 1                                     | 2.525071000  | 2.661354000  | 2.012595000  | 7                                     | 0.254540000  | 2.055351000  | 0.425390000  |
| 1                                     | -3.753813000 | -0.669344000 | 1.669722000  | 7                                     | 1.572221000  | 2.561658000  | -1.218387000 |
| 1                                     | -2.659184000 | 1.711975000  | -1.420037000 | 6                                     | 0.759894000  | 1.548805000  | -0.746993000 |
| 7                                     | 0.586628000  | -0.683075000 | -1.217439000 | 6                                     | 0.666996000  | 3.371048000  | 0.624228000  |
| 7                                     | 0.207007000  | -2.121465000 | 0.712106000  | 6                                     | 1.494047000  | 3.693646000  | -0.401144000 |
| 7                                     | 1.506565000  | -2.847443000 | -0.867075000 | 1                                     | -0.507571000 | 1.541678000  | 0.873902000  |
| 6                                     | 0.734224000  | -1.758793000 | -0.506233000 | 1                                     | 1.990601000  | 2.519955000  | -2.132271000 |
| 6                                     | 0.587720000  | -3.407976000 | 1.050803000  | 6                                     | 2.265174000  | 4.920782000  | -0.693888000 |
| 1                                     | 0.272585000  | -3.879195000 | 1.965869000  | 1                                     | 2.066908000  | 5.686652000  | 0.056953000  |
| 6                                     | 1.400265000  | -3.864343000 | 0.073313000  | 1                                     | 3.346059000  | 4.737913000  | -0.698975000 |
| 1                                     | 1.928634000  | -4.796418000 | -0.023524000 | 1                                     | 2.007501000  | 5.346890000  | -1.670474000 |
| 1                                     | -0.524008000 | -1.528374000 | 1.110228000  | 6                                     | 0.242823000  | 4.147188000  | 1.810261000  |
| 1                                     | 1.962319000  | -2.902120000 | -1.761278000 | 1                                     | -0.846282000 | 4.257475000  | 1.857108000  |
|                                       |              |              |              | 1                                     | 0.556255000  | 3.667509000  | 2.743820000  |
|                                       |              |              |              | 1                                     | 0.673000000  | 5.149532000  | 1.792145000  |
|                                       |              |              |              | 7                                     | -1.545452000 | -0.015260000 | 0.325743000  |
|                                       |              |              |              | 7                                     | -3.865453000 | 0.163123000  | 0.812103000  |
|                                       |              |              |              | 7                                     | -3.348657000 | -1.313162000 | -0.676967000 |

|                                       |              |              |              |                                       |              |              |              |
|---------------------------------------|--------------|--------------|--------------|---------------------------------------|--------------|--------------|--------------|
|                                       |              |              |              | 6                                     | -2.778541000 | -0.368127000 | 0.150690000  |
|                                       |              |              |              | 6                                     | -5.058635000 | -0.463364000 | 0.433136000  |
|                                       |              |              |              | 6                                     | -4.732873000 | -1.381701000 | -0.507001000 |
|                                       |              |              |              | 1                                     | -3.755829000 | 0.823134000  | 1.562738000  |
|                                       |              |              |              | 1                                     | -2.773160000 | -1.865449000 | -1.296315000 |
|                                       |              |              |              | 6                                     | -5.565464000 | -2.322993000 | -1.286322000 |
|                                       |              |              |              | 1                                     | -6.615934000 | -2.229900000 | -1.008366000 |
|                                       |              |              |              | 1                                     | -5.491529000 | -2.139124000 | -2.363853000 |
|                                       |              |              |              | 1                                     | -5.270276000 | -3.364333000 | -1.117239000 |
|                                       |              |              |              | 6                                     | -6.359147000 | -0.077138000 | 1.020032000  |
|                                       |              |              |              | 1                                     | -6.381010000 | -0.225133000 | 2.105899000  |
|                                       |              |              |              | 1                                     | -6.597754000 | 0.976313000  | 0.834212000  |
|                                       |              |              |              | 1                                     | -7.165400000 | -0.675225000 | 0.593900000  |
| <b>P(Im<sup>c</sup>N)<sub>3</sub></b> |              |              |              | <b>P(Im<sup>d</sup>N)<sub>3</sub></b> |              |              |              |
| 15                                    | -0.180348000 | -0.078318000 | -1.024637000 | 15                                    | -0.234872000 | 0.377283000  | -1.228019000 |
| 7                                     | -0.036465000 | 1.609553000  | -0.857784000 | 7                                     | 0.636052000  | 1.816311000  | -0.968237000 |
| 7                                     | 1.180313000  | 2.080240000  | 1.239194000  | 7                                     | 2.185793000  | 1.437881000  | 0.908419000  |
| 7                                     | 1.233760000  | 3.535016000  | -0.394564000 | 7                                     | 2.716576000  | 2.874659000  | -0.645621000 |
| 7                                     | -1.307916000 | -0.549718000 | 0.213680000  | 7                                     | -1.310535000 | 0.212502000  | 0.126691000  |
| 7                                     | -3.421046000 | -1.005625000 | 1.117805000  | 7                                     | -3.503809000 | 0.041017000  | 0.980961000  |
| 7                                     | -3.475784000 | 0.230025000  | -0.690056000 | 7                                     | -3.198367000 | 1.686143000  | -0.425002000 |
| 6                                     | 0.712995000  | 2.288812000  | -0.052839000 | 6                                     | 1.718216000  | 1.982461000  | -0.276244000 |
| 6                                     | 1.946542000  | 3.160465000  | 1.651522000  | 6                                     | 3.432572000  | 1.978641000  | 1.241057000  |
| 1                                     | 2.398656000  | 3.187563000  | 2.628843000  | 6                                     | 3.759459000  | 2.873044000  | 0.275693000  |
| 6                                     | 1.974091000  | 4.060738000  | 0.645869000  | 6                                     | -2.529539000 | 0.632090000  | 0.181562000  |
| 1                                     | 2.458809000  | 5.019884000  | 0.574377000  | 6                                     | -4.721622000 | 0.709519000  | 0.864949000  |
| 6                                     | -2.590552000 | -0.424748000 | 0.163829000  | 6                                     | -4.536077000 | 1.726675000  | -0.011075000 |
| 6                                     | -4.749893000 | -0.733430000 | 0.846737000  | 6                                     | -3.246828000 | -1.134217000 | 1.767783000  |
| 1                                     | -5.546010000 | -1.090844000 | 1.477704000  | 1                                     | -3.392296000 | -0.946251000 | 2.836762000  |
| 6                                     | -4.784324000 | 0.022424000  | -0.270484000 | 1                                     | -3.894561000 | -1.965995000 | 1.470105000  |
| 1                                     | -5.618036000 | 0.446958000  | -0.803803000 | 1                                     | -2.205156000 | -1.410286000 | 1.594092000  |
| 6                                     | -2.889951000 | -1.785753000 | 2.202004000  | 6                                     | -2.587174000 | 2.657823000  | -1.302833000 |
| 1                                     | -3.708223000 | -2.103178000 | 2.848409000  | 1                                     | -2.777086000 | 2.433767000  | -2.357249000 |
| 1                                     | -2.361325000 | -2.668046000 | 1.828035000  | 1                                     | -2.982129000 | 3.652839000  | -1.080542000 |
| 1                                     | -2.174131000 | -1.197451000 | 2.783018000  | 1                                     | -1.507019000 | 2.669664000  | -1.142099000 |
| 6                                     | -3.118041000 | 0.973778000  | -1.878092000 | 6                                     | 1.404963000  | 0.630705000  | 1.818236000  |
| 1                                     | -2.996367000 | 0.319498000  | -2.746334000 | 1                                     | 1.800959000  | -0.386695000 | 1.893099000  |
| 1                                     | -3.912805000 | 1.693131000  | -2.088136000 | 1                                     | 1.411371000  | 1.087308000  | 2.814074000  |
| 1                                     | -2.185436000 | 1.518305000  | -1.714250000 | 1                                     | 0.377785000  | 0.565134000  | 1.457642000  |
| 6                                     | 0.774805000  | 1.018506000  | 2.134754000  | 6                                     | 2.658481000  | 3.637291000  | -1.862880000 |
| 1                                     | 1.578549000  | 0.291665000  | 2.277058000  | 1                                     | 1.784279000  | 3.284713000  | -2.411391000 |
| 1                                     | 0.500662000  | 1.454259000  | 3.100972000  | 1                                     | 2.547196000  | 4.709109000  | -1.665988000 |
| 1                                     | -0.080752000 | 0.489322000  | 1.712839000  | 1                                     | 3.557303000  | 3.484562000  | -2.467407000 |
| 6                                     | 1.006209000  | 4.145201000  | -1.677075000 | 7                                     | 0.948956000  | -0.762145000 | -0.774976000 |
| 1                                     | 0.642541000  | 3.364535000  | -2.345883000 | 7                                     | 1.990020000  | -2.772220000 | -0.168011000 |
| 1                                     | 0.251981000  | 4.937452000  | -1.622097000 | 7                                     | -0.124653000 | -2.980383000 | -0.711507000 |
| 1                                     | 1.934907000  | 4.567760000  | -2.067375000 | 6                                     | 0.887115000  | -2.028291000 | -0.590015000 |
| 7                                     | 1.271675000  | -0.578785000 | -0.283853000 | 6                                     | 1.683346000  | -4.130429000 | -0.105476000 |
| 7                                     | 3.203325000  | -1.886306000 | 0.020275000  | 6                                     | 0.381262000  | -4.264914000 | -0.449695000 |
| 7                                     | 1.436416000  | -3.008278000 | -0.627588000 | 6                                     | 3.283882000  | -2.180864000 | 0.038037000  |
| 6                                     | 1.860206000  | -1.717981000 | -0.320666000 | 1                                     | 3.677708000  | -2.419465000 | 1.031713000  |
| 6                                     | 3.568856000  | -3.217402000 | -0.072482000 | 1                                     | 4.009440000  | -2.514976000 | -0.712409000 |
| 1                                     | 4.565841000  | -3.552464000 | 0.158840000  | 1                                     | 3.159541000  | -1.099921000 | -0.055450000 |
| 6                                     | 2.484012000  | -3.908174000 | -0.480710000 | 6                                     | -1.370085000 | -2.748352000 | -1.404733000 |

|                                    |              |              |              |                                    |              |              |              |
|------------------------------------|--------------|--------------|--------------|------------------------------------|--------------|--------------|--------------|
| 1                                  | 2.354431000  | -4.959183000 | -0.676790000 | 1                                  | -1.754507000 | -1.762266000 | -1.148941000 |
| 6                                  | 4.042786000  | -0.791755000 | 0.427722000  | 1                                  | -1.251717000 | -2.809473000 | -2.493440000 |
| 1                                  | 4.271951000  | -0.833309000 | 1.498450000  | 1                                  | -2.102722000 | -3.494938000 | -1.091410000 |
| 1                                  | 4.981378000  | -0.793987000 | -0.132499000 | 6                                  | 2.682558000  | -5.132033000 | 0.327661000  |
| 1                                  | 3.497447000  | 0.130411000  | 0.220261000  | 1                                  | 3.027058000  | -4.957349000 | 1.353936000  |
| 6                                  | 0.098293000  | -3.365102000 | -1.036983000 | 1                                  | 2.259984000  | -6.136877000 | 0.291296000  |
| 1                                  | -0.621069000 | -2.722056000 | -0.525460000 | 1                                  | 3.573510000  | -5.126628000 | -0.310282000 |
| 1                                  | -0.042701000 | -3.257666000 | -2.116689000 | 6                                  | -0.475315000 | -5.469291000 | -0.517149000 |
| 1                                  | -0.091227000 | -4.404134000 | -0.758331000 | 1                                  | 0.103643000  | -6.358985000 | -0.265565000 |
|                                    |              |              |              | 1                                  | -1.318861000 | -5.419933000 | 0.182288000  |
|                                    |              |              |              | 1                                  | -0.899189000 | -5.626993000 | -1.515730000 |
|                                    |              |              |              | 6                                  | -5.921359000 | 0.278594000  | 1.615848000  |
|                                    |              |              |              | 1                                  | -6.770887000 | 0.921502000  | 1.382226000  |
|                                    |              |              |              | 1                                  | -6.212985000 | -0.750761000 | 1.376770000  |
|                                    |              |              |              | 1                                  | -5.767274000 | 0.320130000  | 2.700301000  |
|                                    |              |              |              | 6                                  | -5.475821000 | 2.755567000  | -0.508629000 |
|                                    |              |              |              | 1                                  | -5.540129000 | 2.759001000  | -1.602506000 |
|                                    |              |              |              | 1                                  | -6.478994000 | 2.572928000  | -0.120961000 |
|                                    |              |              |              | 1                                  | -5.189306000 | 3.769260000  | -0.204820000 |
|                                    |              |              |              | 6                                  | 4.959505000  | 3.720316000  | 0.098609000  |
|                                    |              |              |              | 1                                  | 5.652680000  | 3.581924000  | 0.929380000  |
|                                    |              |              |              | 1                                  | 5.502075000  | 3.484829000  | -0.824443000 |
|                                    |              |              |              | 1                                  | 4.707761000  | 4.785975000  | 0.054414000  |
|                                    |              |              |              | 6                                  | 4.166575000  | 1.550306000  | 2.452491000  |
|                                    |              |              |              | 1                                  | 3.622541000  | 1.778530000  | 3.376274000  |
|                                    |              |              |              | 1                                  | 4.355078000  | 0.470150000  | 2.457327000  |
|                                    |              |              |              | 1                                  | 5.133074000  | 2.053024000  | 2.511014000  |
| P(Im <sup>a</sup> CH) <sub>3</sub> |              |              |              | P(Im <sup>b</sup> CH) <sub>3</sub> |              |              |              |
| 15                                 | -0.036429000 | 0.401671000  | 1.226458000  | 15                                 | 0.094318000  | -0.107056000 | -2.751889000 |
| 6                                  | 0.797415000  | 0.760012000  | -0.349595000 | 6                                  | 0.311876000  | 1.555123000  | -2.066662000 |
| 7                                  | 2.917921000  | 1.336409000  | 0.768355000  | 7                                  | -0.929506000 | 1.467092000  | 0.074309000  |
| 7                                  | 2.809877000  | 1.835876000  | -1.348193000 | 7                                  | -0.483608000 | 3.449924000  | -0.672553000 |
| 6                                  | -0.722664000 | -1.265742000 | 0.947245000  | 6                                  | -0.333775000 | 2.107433000  | -0.982101000 |
| 7                                  | -0.298730000 | -3.663292000 | 0.439456000  | 6                                  | -1.454551000 | 2.373538000  | 0.992590000  |
| 7                                  | 1.202487000  | -2.238244000 | -0.253259000 | 6                                  | -1.201137000 | 3.616606000  | 0.520446000  |
| 6                                  | 2.064486000  | 1.280790000  | -0.318084000 | 1                                  | -0.890786000 | 0.461189000  | 0.213743000  |
| 6                                  | 4.078530000  | 2.029096000  | 0.448749000  | 1                                  | -0.332491000 | 4.174558000  | -1.353014000 |
| 1                                  | 4.865170000  | 2.186038000  | 1.166215000  | 6                                  | -1.525112000 | 4.957477000  | 1.051497000  |
| 6                                  | 4.016196000  | 2.343734000  | -0.858523000 | 1                                  | -2.078386000 | 4.874351000  | 1.987817000  |
| 1                                  | 4.736428000  | 2.821044000  | -1.499801000 | 1                                  | -0.624825000 | 5.549801000  | 1.251816000  |
| 6                                  | 0.002115000  | -2.306205000 | 0.432629000  | 1                                  | -2.143552000 | 5.539330000  | 0.357740000  |
| 6                                  | 0.587489000  | -4.358015000 | -0.384653000 | 6                                  | -2.133724000 | 1.895495000  | 2.215884000  |
| 1                                  | 0.518144000  | -5.422551000 | -0.526781000 | 1                                  | -2.975971000 | 1.237325000  | 1.973344000  |
| 6                                  | 1.510425000  | -3.474635000 | -0.810389000 | 1                                  | -1.456408000 | 1.319703000  | 2.858280000  |
| 1                                  | 2.396087000  | -3.628150000 | -1.402499000 | 1                                  | -2.518508000 | 2.729948000  | 2.803595000  |
| 1                                  | 2.558232000  | 1.133649000  | 1.691900000  | 1                                  | 0.732093000  | 2.275496000  | -2.764451000 |
| 1                                  | 2.377981000  | 2.129212000  | -2.207653000 | 6                                  | -1.525590000 | -0.680318000 | -2.180374000 |
| 1                                  | -1.196530000 | -4.007965000 | 0.731385000  | 7                                  | -0.952333000 | -1.550474000 | 0.050807000  |
| 1                                  | 1.513134000  | -1.324991000 | -0.577282000 | 7                                  | -3.040683000 | -1.863976000 | -0.603981000 |
| 6                                  | -1.522052000 | 1.408028000  | 1.217152000  | 6                                  | -1.822642000 | -1.328534000 | -1.025716000 |
| 7                                  | -2.628825000 | 0.330953000  | -0.698671000 | 6                                  | -1.573915000 | -2.423788000 | 0.972068000  |
| 7                                  | -3.688473000 | 2.033889000  | 0.168416000  | 6                                  | -2.849147000 | -2.609114000 | 0.574499000  |
| 6                                  | -2.531672000 | 1.278506000  | 0.306027000  | 1                                  | 0.024279000  | -1.687380000 | -0.225313000 |
| 6                                  | -3.880871000 | 0.398963000  | -1.300413000 | 1                                  | -3.744394000 | -2.110322000 | -1.282359000 |

|                                    |              |              |              |                                    |              |              |              |
|------------------------------------|--------------|--------------|--------------|------------------------------------|--------------|--------------|--------------|
| 1                                  | -4.166480000 | -0.266158000 | -2.097268000 | 6                                  | -3.976839000 | -3.323393000 | 1.211203000  |
| 6                                  | -4.536171000 | 1.451218000  | -0.773505000 | 1                                  | -3.649844000 | -3.832877000 | 2.118379000  |
| 1                                  | -5.489186000 | 1.882485000  | -1.027224000 | 1                                  | -4.790049000 | -2.641586000 | 1.485291000  |
| 1                                  | -2.047654000 | -0.504414000 | -0.605545000 | 1                                  | -4.407183000 | -4.081709000 | 0.546823000  |
| 1                                  | -3.977941000 | 2.697165000  | 0.865922000  | 6                                  | -0.845110000 | -2.865352000 | 2.180140000  |
| 1                                  | -1.575764000 | -1.528717000 | 1.568907000  | 1                                  | 0.067821000  | -3.415152000 | 1.922974000  |
| 1                                  | -1.587324000 | 2.220470000  | 1.931954000  | 1                                  | -0.533901000 | -2.014942000 | 2.799167000  |
| 1                                  | 0.242991000  | 0.864188000  | -1.281651000 | 1                                  | -1.462697000 | -3.520844000 | 2.795879000  |
|                                    |              |              |              | 1                                  | -2.337236000 | -0.563679000 | -2.893372000 |
|                                    |              |              |              | 6                                  | 1.285611000  | -1.201911000 | -1.920013000 |
|                                    |              |              |              | 7                                  | 2.049356000  | 0.172429000  | -0.017826000 |
|                                    |              |              |              | 7                                  | 3.177882000  | -1.678966000 | -0.382599000 |
|                                    |              |              |              | 6                                  | 2.114532000  | -0.919058000 | -0.871569000 |
|                                    |              |              |              | 6                                  | 3.178976000  | 0.190105000  | 0.816721000  |
|                                    |              |              |              | 6                                  | 3.874652000  | -0.945970000 | 0.597792000  |
|                                    |              |              |              | 1                                  | 1.640944000  | 1.019274000  | -0.416410000 |
|                                    |              |              |              | 1                                  | 3.640583000  | -2.343698000 | -0.982772000 |
|                                    |              |              |              | 6                                  | 5.067558000  | -1.509701000 | 1.265262000  |
|                                    |              |              |              | 1                                  | 5.467815000  | -0.807267000 | 1.997502000  |
|                                    |              |              |              | 1                                  | 4.841565000  | -2.445240000 | 1.790282000  |
|                                    |              |              |              | 1                                  | 5.870636000  | -1.730505000 | 0.552277000  |
|                                    |              |              |              | 6                                  | 3.364308000  | 1.280579000  | 1.798096000  |
|                                    |              |              |              | 1                                  | 3.422998000  | 2.259316000  | 1.308225000  |
|                                    |              |              |              | 1                                  | 2.529116000  | 1.332621000  | 2.506854000  |
|                                    |              |              |              | 1                                  | 4.282580000  | 1.143228000  | 2.370697000  |
|                                    |              |              |              | 1                                  | 1.527458000  | -2.102619000 | -2.480327000 |
| P(Im <sup>c</sup> CH) <sub>3</sub> |              |              |              | P(Im <sup>d</sup> CH) <sub>3</sub> |              |              |              |
| 15                                 | -0.039501000 | 0.405984000  | -1.012684000 | 15                                 | 0.218887000  | 0.935586000  | -1.023830000 |
| 6                                  | -1.603400000 | 1.300255000  | -0.844310000 | 6                                  | 1.816033000  | 1.748750000  | -0.800470000 |
| 7                                  | -2.800478000 | 0.479931000  | 1.200331000  | 7                                  | 3.129814000  | 0.436028000  | 0.870314000  |
| 7                                  | -3.998118000 | 1.492864000  | -0.334649000 | 7                                  | 4.259747000  | 1.667780000  | -0.548779000 |
| 6                                  | -0.572515000 | -1.286505000 | -0.637508000 | 6                                  | -0.821760000 | 0.981974000  | 0.463889000  |
| 7                                  | -0.293131000 | -3.636645000 | -0.014223000 | 7                                  | -3.143657000 | 0.968280000  | 1.271452000  |
| 7                                  | 1.553562000  | -2.623153000 | -0.686152000 | 7                                  | -2.710175000 | 2.416527000  | -0.315762000 |
| 6                                  | -2.699454000 | 1.090204000  | -0.042325000 | 6                                  | 2.968660000  | 1.305684000  | -0.195340000 |
| 6                                  | -4.111787000 | 0.562620000  | 1.659451000  | 6                                  | 4.492908000  | 0.294022000  | 1.171902000  |
| 1                                  | -4.396238000 | 0.152276000  | 2.613380000  | 6                                  | 5.190681000  | 1.050482000  | 0.292452000  |
| 6                                  | -4.847845000 | 1.181936000  | 0.716302000  | 6                                  | -2.119535000 | 1.433832000  | 0.460876000  |
| 1                                  | -5.900725000 | 1.405087000  | 0.677959000  | 6                                  | -4.338458000 | 1.639474000  | 0.986929000  |
| 6                                  | 0.186991000  | -2.408708000 | -0.473472000 | 6                                  | -4.068235000 | 2.539608000  | 0.012210000  |
| 6                                  | 0.722441000  | -4.582297000 | -0.030539000 | 6                                  | -2.985590000 | -0.190525000 | 2.105177000  |
| 1                                  | 0.557230000  | -5.591692000 | 0.307589000  | 1                                  | -3.961018000 | -0.526617000 | 2.457532000  |
| 6                                  | 1.844197000  | -3.969808000 | -0.450354000 | 1                                  | -2.506586000 | -0.998073000 | 1.536494000  |
| 1                                  | 2.844943000  | -4.349889000 | -0.568837000 | 1                                  | -2.358290000 | 0.020978000  | 2.979472000  |
| 6                                  | -1.670293000 | -3.863116000 | 0.306136000  | 6                                  | -1.962413000 | 3.386023000  | -1.081584000 |
| 1                                  | -1.782905000 | -4.860460000 | 0.731410000  | 1                                  | -1.829579000 | 3.084887000  | -2.123715000 |
| 1                                  | -2.021401000 | -3.124703000 | 1.037562000  | 1                                  | -2.473765000 | 4.351754000  | -1.049120000 |
| 1                                  | -2.313930000 | -3.783658000 | -0.579546000 | 1                                  | -0.967718000 | 3.492725000  | -0.638943000 |
| 6                                  | 2.334191000  | -1.835868000 | -1.616967000 | 6                                  | 2.061321000  | 0.172931000  | 1.809537000  |
| 1                                  | 2.358087000  | -0.787889000 | -1.315220000 | 1                                  | 1.434769000  | -0.663047000 | 1.484335000  |
| 1                                  | 3.354665000  | -2.223104000 | -1.623169000 | 1                                  | 2.485280000  | -0.053143000 | 2.788958000  |
| 1                                  | 1.926758000  | -1.895203000 | -2.633704000 | 1                                  | 1.421360000  | 1.057319000  | 1.885616000  |
| 6                                  | -1.664613000 | 0.251250000  | 2.066442000  | 6                                  | 4.543551000  | 2.520232000  | -1.667082000 |
| 1                                  | -0.996099000 | 1.117566000  | 2.046292000  | 1                                  | 4.005005000  | 2.167841000  | -2.553851000 |

|   |              |              |              |   |              |              |              |
|---|--------------|--------------|--------------|---|--------------|--------------|--------------|
| 1 | -2.028608000 | 0.092697000  | 3.082596000  | 1 | 4.235887000  | 3.556241000  | -1.479364000 |
| 1 | -1.088933000 | -0.620284000 | 1.743842000  | 1 | 5.613081000  | 2.511329000  | -1.875401000 |
| 6 | -4.360145000 | 2.151745000  | -1.556450000 | 6 | 0.709492000  | -0.811721000 | -0.992864000 |
| 1 | -3.998807000 | 1.579200000  | -2.417206000 | 7 | 0.352889000  | -3.193043000 | -0.553813000 |
| 1 | -5.445594000 | 2.231836000  | -1.613417000 | 7 | -1.492769000 | -1.993758000 | -0.802540000 |
| 1 | -3.930720000 | 3.158764000  | -1.617260000 | 6 | -0.095392000 | -1.900524000 | -0.824146000 |
| 1 | -1.816093000 | 1.910288000  | -1.718148000 | 6 | -0.733527000 | -4.055357000 | -0.367699000 |
| 1 | -1.639235000 | -1.422840000 | -0.489735000 | 6 | -1.860560000 | -3.330876000 | -0.540238000 |
| 6 | 1.080818000  | 0.699596000  | 0.392864000  | 6 | 1.740013000  | -3.494288000 | -0.368296000 |
| 7 | 3.337912000  | 1.329795000  | 1.146368000  | 1 | 2.189085000  | -2.820671000 | 0.375923000  |
| 7 | 2.519315000  | 2.536931000  | -0.495052000 | 1 | 1.853808000  | -4.523159000 | -0.027367000 |
| 6 | 2.215615000  | 1.467405000  | 0.337391000  | 1 | 2.308330000  | -3.373691000 | -1.299478000 |
| 6 | 4.283175000  | 2.294516000  | 0.825837000  | 6 | -2.334156000 | -1.169089000 | -1.647283000 |
| 1 | 5.228259000  | 2.353377000  | 1.338573000  | 1 | -1.862466000 | -0.201463000 | -1.814322000 |
| 6 | 3.779242000  | 3.035796000  | -0.180579000 | 1 | -2.504075000 | -1.640771000 | -2.625480000 |
| 1 | 4.197791000  | 3.875344000  | -0.708812000 | 1 | -3.303292000 | -0.996964000 | -1.168545000 |
| 6 | 3.491376000  | 0.250756000  | 2.078865000  | 6 | -0.548669000 | -5.477879000 | -0.008166000 |
| 1 | 4.510111000  | 0.250382000  | 2.466402000  | 1 | -0.029203000 | -5.605047000 | 0.949725000  |
| 1 | 2.796183000  | 0.342770000  | 2.921719000  | 1 | -1.515452000 | -5.975261000 | 0.078111000  |
| 1 | 3.293231000  | -0.709261000 | 1.586171000  | 1 | 0.034101000  | -6.020742000 | -0.761338000 |
| 6 | 1.547880000  | 3.240266000  | -1.301791000 | 6 | -3.284234000 | -3.725448000 | -0.461142000 |
| 1 | 0.558636000  | 3.133799000  | -0.845737000 | 1 | -3.376272000 | -4.783326000 | -0.210656000 |
| 1 | 1.813268000  | 4.300498000  | -1.335495000 | 1 | -3.825670000 | -3.155718000 | 0.304904000  |
| 1 | 1.492699000  | 2.850401000  | -2.320793000 | 1 | -3.817595000 | -3.565680000 | -1.405800000 |
| 1 | 1.051284000  | -0.013376000 | 1.213522000  | 6 | -5.604915000 | 1.318778000  | 1.679773000  |
|   |              |              |              | 1 | -6.404203000 | 1.972688000  | 1.328874000  |
|   |              |              |              | 1 | -5.930962000 | 0.285673000  | 1.505641000  |
|   |              |              |              | 1 | -5.527054000 | 1.449547000  | 2.765351000  |
|   |              |              |              | 6 | -4.946494000 | 3.523400000  | -0.658210000 |
|   |              |              |              | 1 | -4.923447000 | 3.414752000  | -1.748373000 |
|   |              |              |              | 1 | -5.980054000 | 3.392058000  | -0.334965000 |
|   |              |              |              | 1 | -4.668281000 | 4.560653000  | -0.436831000 |
|   |              |              |              | 6 | 6.648449000  | 1.226925000  | 0.115812000  |
|   |              |              |              | 1 | 7.192326000  | 0.659638000  | 0.872008000  |
|   |              |              |              | 1 | 6.997382000  | 0.881341000  | -0.864987000 |
|   |              |              |              | 1 | 6.953282000  | 2.275257000  | 0.212447000  |
|   |              |              |              | 6 | 4.961245000  | -0.593372000 | 2.259054000  |
|   |              |              |              | 1 | 4.670719000  | -0.238164000 | 3.254922000  |
|   |              |              |              | 1 | 4.560084000  | -1.608435000 | 2.154551000  |
|   |              |              |              | 1 | 6.049765000  | -0.665508000 | 2.249374000  |
|   |              |              |              | 1 | 1.775055000  | -1.014165000 | -1.039805000 |
|   |              |              |              | 1 | -0.616010000 | 0.248635000  | 1.240225000  |
|   |              |              |              | 1 | 1.976929000  | 2.541627000  | -1.525341000 |

**Table S4:** Cartesian coordinates of optimized geometries of mono-phosphine-N<sub>2</sub> van der Waals complexes at M06L/6-311++G(d,p) level DFT. Atomic number followed by X, Y, Z coordinates in Å.

| PH <sub>3</sub> ⋯N <sub>2</sub> |              |              |              | PMe <sub>3</sub> ⋯N <sub>2</sub> |              |              |              |
|---------------------------------|--------------|--------------|--------------|----------------------------------|--------------|--------------|--------------|
| 15                              | -1.739856000 | -0.038980000 | -0.122764000 | 15                               | -0.640425000 | -0.000117000 | -0.382661000 |
| 1                               | -1.264562000 | -0.804368000 | 0.972208000  | 7                                | 2.754966000  | 0.000753000  | 0.178327000  |
| 1                               | -1.158805000 | 1.155621000  | 0.372924000  | 7                                | 3.497907000  | -0.000722000 | -0.635113000 |
| 7                               | 2.259082000  | -0.549291000 | -0.022547000 | 6                                | -0.619145000 | -1.398370000 | 0.821189000  |
| 7                               | 2.241452000  | 0.551171000  | 0.020928000  | 1                                | -0.779036000 | -2.345080000 | 0.300189000  |
| 1                               | -2.982526000 | 0.220292000  | 0.507669000  | 1                                | 0.356694000  | -1.451942000 | 1.308951000  |



|                                                     |              |              |                                                     |              |              |              |              |
|-----------------------------------------------------|--------------|--------------|-----------------------------------------------------|--------------|--------------|--------------|--------------|
|                                                     |              | 1            | -1.388392000                                        | -1.292949000 | 1.593535000  |              |              |
|                                                     |              | 6            | -2.442867000                                        | -0.000105000 | -0.780546000 |              |              |
|                                                     |              | 1            | -3.067370000                                        | 0.000333000  | 0.119158000  |              |              |
|                                                     |              | 1            | -2.694282000                                        | 0.879971000  | -1.376764000 |              |              |
|                                                     |              | 1            | -2.694412000                                        | -0.880660000 | -1.376003000 |              |              |
|                                                     |              | 6            | -0.619052000                                        | 1.398630000  | 0.820639000  |              |              |
|                                                     |              | 1            | 0.356774000                                         | 1.452399000  | 1.308392000  |              |              |
|                                                     |              | 1            | -0.779016000                                        | 2.345116000  | 0.299264000  |              |              |
|                                                     |              | 1            | -1.388318000                                        | 1.293427000  | 1.592997000  |              |              |
| P(Im <sup>a</sup> N) <sub>3</sub> ···N <sub>2</sub> |              |              | P(Im <sup>b</sup> N) <sub>3</sub> ···N <sub>2</sub> |              |              |              |              |
| 15                                                  | 0.097030000  | 0.911366000  | -0.329569000                                        | 15           | 0.149424000  | 0.012637000  | -0.998924000 |
| 7                                                   | -0.308541000 | -0.141046000 | 0.992876000                                         | 7            | -1.066391000 | -0.785636000 | -0.066272000 |
| 7                                                   | -0.155576000 | -2.190055000 | -0.317814000                                        | 7            | -2.485496000 | 1.154724000  | 0.230572000  |
| 7                                                   | -0.833560000 | -2.343266000 | 1.735239000                                         | 7            | -3.319047000 | -0.788131000 | 0.717024000  |
| 7                                                   | -1.199538000 | 0.723121000  | -1.422083000                                        | 7            | 1.594517000  | -0.746749000 | -0.451018000 |
| 7                                                   | -3.537074000 | 0.949742000  | -1.780920000                                        | 7            | 2.826981000  | -2.736911000 | -0.013668000 |
| 7                                                   | -2.913431000 | 0.916911000  | 0.300739000                                         | 7            | 0.671798000  | -2.956431000 | -0.064893000 |
| 6                                                   | -0.413008000 | -1.421675000 | 0.795410000                                         | 6            | -2.161984000 | -0.182798000 | 0.257509000  |
| 6                                                   | -0.363403000 | -3.532149000 | -0.053835000                                        | 6            | -3.799523000 | 1.367559000  | 0.643655000  |
| 1                                                   | -0.209554000 | -4.295419000 | -0.796924000                                        | 6            | -4.332327000 | 0.153725000  | 0.925357000  |
| 6                                                   | -0.789707000 | -3.633716000 | 1.223889000                                         | 6            | 1.665087000  | -2.014213000 | -0.206704000 |
| 1                                                   | -1.080778000 | -4.493376000 | 1.801358000                                         | 6            | 2.549662000  | -4.074651000 | 0.286612000  |
| 6                                                   | -2.406263000 | 0.852904000  | -0.989224000                                        | 6            | 1.200662000  | -4.202830000 | 0.267579000  |
| 6                                                   | -4.686765000 | 1.027845000  | -1.007364000                                        | 7            | -3.950767000 | -0.636938000 | -2.373241000 |
| 1                                                   | -5.667573000 | 1.114159000  | -1.441191000                                        | 7            | -4.188161000 | 0.439843000  | -2.360991000 |
| 6                                                   | -4.299257000 | 0.994924000  | 0.284842000                                         | 1            | -1.732298000 | 1.824660000  | 0.078615000  |
| 1                                                   | -4.884739000 | 1.044346000  | 1.186618000                                         | 1            | -3.448672000 | -1.784701000 | 0.674477000  |
| 7                                                   | 1.406224000  | 2.117097000  | 2.566981000                                         | 1            | 3.739850000  | -2.323742000 | -0.090810000 |
| 7                                                   | 0.614631000  | 2.343875000  | 3.299247000                                         | 1            | -0.287776000 | -2.620320000 | 0.010936000  |
| 1                                                   | -3.479978000 | 0.956802000  | -2.784075000                                        | 7            | 0.232210000  | 1.557684000  | -0.237118000 |
| 1                                                   | -2.306952000 | 0.689447000  | 1.082196000                                         | 7            | 2.639571000  | 1.832920000  | -0.348408000 |
| 1                                                   | 0.291126000  | -1.752218000 | -1.123031000                                        | 7            | 1.450233000  | 3.548346000  | 0.237285000  |
| 1                                                   | -1.054259000 | -2.077217000 | 2.679061000                                         | 6            | 1.335602000  | 2.222573000  | -0.136221000 |
| 7                                                   | 1.260214000  | 0.017350000  | -1.251495000                                        | 6            | 3.530196000  | 2.858159000  | -0.030443000 |
| 7                                                   | 3.577471000  | -0.324743000 | -1.647409000                                        | 6            | 2.791248000  | 3.936298000  | 0.326996000  |
| 7                                                   | 3.107169000  | 0.892489000  | 0.083690000                                         | 1            | 2.818184000  | 0.834102000  | -0.448730000 |
| 6                                                   | 2.505041000  | 0.194862000  | -0.947150000                                        | 1            | 0.654072000  | 4.109881000  | 0.484184000  |
| 6                                                   | 4.784291000  | 0.101400000  | -1.106736000                                        | 6            | 3.627886000  | -5.056146000 | 0.530834000  |
| 1                                                   | 5.734369000  | -0.192180000 | -1.516950000                                        | 1            | 4.287706000  | -5.169918000 | -0.337344000 |
| 6                                                   | 4.489727000  | 0.855037000  | -0.027843000                                        | 1            | 4.260324000  | -4.770406000 | 1.379352000  |
| 1                                                   | 5.137063000  | 1.342373000  | 0.680342000                                         | 1            | 3.209393000  | -6.038581000 | 0.752694000  |
| 1                                                   | 3.447972000  | -0.787487000 | -2.530464000                                        | 6            | 0.332137000  | -5.377327000 | 0.500736000  |
| 1                                                   | 2.567991000  | 1.413352000  | 0.761298000                                         | 1            | -0.359465000 | -5.215574000 | 1.335172000  |
|                                                     |              |              |                                                     | 1            | -0.276557000 | -5.613754000 | -0.378950000 |
|                                                     |              |              |                                                     | 1            | 0.928473000  | -6.259703000 | 0.736729000  |
|                                                     |              |              |                                                     | 6            | -4.392788000 | 2.721628000  | 0.672400000  |
|                                                     |              |              |                                                     | 1            | -5.428905000 | 2.684745000  | 1.011321000  |
|                                                     |              |              |                                                     | 1            | -3.850070000 | 3.394969000  | 1.345134000  |
|                                                     |              |              |                                                     | 1            | -4.383697000 | 3.181733000  | -0.322136000 |
|                                                     |              |              |                                                     | 6            | -5.692770000 | -0.251922000 | 1.336160000  |
|                                                     |              |              |                                                     | 1            | -5.692293000 | -0.798328000 | 2.286074000  |
|                                                     |              |              |                                                     | 1            | -6.334096000 | 0.621449000  | 1.460005000  |
|                                                     |              |              |                                                     | 1            | -6.167333000 | -0.902937000 | 0.591089000  |
|                                                     |              |              |                                                     | 6            | 4.993683000  | 2.678793000  | -0.149502000 |

|                                 |              |              |              |                                 |              |              |              |
|---------------------------------|--------------|--------------|--------------|---------------------------------|--------------|--------------|--------------|
|                                 |              |              |              | 1                               | 5.520703000  | 3.590791000  | 0.134043000  |
|                                 |              |              |              | 1                               | 5.360928000  | 1.873382000  | 0.496512000  |
|                                 |              |              |              | 1                               | 5.290905000  | 2.428602000  | -1.173934000 |
|                                 |              |              |              | 6                               | 3.178175000  | 5.310218000  | 0.712142000  |
|                                 |              |              |              | 1                               | 2.788534000  | 6.060219000  | 0.013842000  |
|                                 |              |              |              | 1                               | 2.809071000  | 5.577612000  | 1.709122000  |
|                                 |              |              |              | 1                               | 4.263850000  | 5.412837000  | 0.728891000  |
| $P(\text{Im}^c N)_3 \cdots N_2$ |              |              |              | $P(\text{Im}^d N)_3 \cdots N_2$ |              |              |              |
| 15                              | -0.348022000 | 0.123279000  | -0.870342000 | 15                              | 0.118187000  | -0.238231000 | -0.996409000 |
| 7                               | 0.030754000  | -1.526077000 | -0.674040000 | 7                               | -0.623363000 | -1.771130000 | -0.935871000 |
| 7                               | 1.135479000  | -1.810195000 | 1.515080000  | 7                               | -2.255455000 | -1.735092000 | 0.906020000  |
| 7                               | 1.512278000  | -3.256578000 | -0.085034000 | 7                               | -2.618683000 | -3.021916000 | -0.818703000 |
| 7                               | 0.925738000  | 0.842508000  | 0.013210000  | 7                               | 1.183578000  | -0.175117000 | 0.375743000  |
| 7                               | 2.648287000  | 2.408949000  | 0.373034000  | 7                               | 3.118024000  | -1.538761000 | -0.300809000 |
| 7                               | 0.851598000  | 3.225754000  | -0.578255000 | 7                               | 3.344427000  | -0.087399000 | 1.318003000  |
| 6                               | 0.798464000  | -2.093259000 | 0.197204000  | 6                               | -1.707810000 | -2.103648000 | -0.311390000 |
| 6                               | 2.015329000  | -2.768140000 | 1.999026000  | 6                               | -3.467089000 | -2.399149000 | 1.122576000  |
| 1                               | 2.394249000  | -2.724101000 | 3.006379000  | 6                               | -3.689468000 | -3.201543000 | 0.052243000  |
| 6                               | 2.244022000  | -3.661507000 | 1.013424000  | 6                               | 2.405528000  | -0.586646000 | 0.416716000  |
| 1                               | 2.871900000  | -4.536216000 | 0.989837000  | 6                               | 4.454804000  | -1.576511000 | 0.118805000  |
| 6                               | 1.383882000  | 2.037409000  | -0.086425000 | 6                               | 4.590725000  | -0.680854000 | 1.125782000  |
| 6                               | 2.862508000  | 3.761602000  | 0.174181000  | 6                               | 2.587822000  | -2.350978000 | -1.372256000 |
| 1                               | 3.780614000  | 4.242189000  | 0.467108000  | 1                               | 2.813290000  | -1.923898000 | -2.355289000 |
| 6                               | 1.759943000  | 4.264002000  | -0.419217000 | 1                               | 3.023281000  | -3.352260000 | -1.319174000 |
| 1                               | 1.533978000  | 5.264717000  | -0.746865000 | 1                               | 1.504771000  | -2.439877000 | -1.268114000 |
| 6                               | 3.545851000  | 1.489127000  | 1.019908000  | 6                               | 3.051145000  | 0.999111000  | 2.212671000  |
| 1                               | 3.717390000  | 1.767851000  | 2.065046000  | 1                               | 1.977697000  | 1.183127000  | 2.148671000  |
| 1                               | 3.080878000  | 0.502784000  | 0.985749000  | 1                               | 3.313754000  | 0.747619000  | 3.244515000  |
| 1                               | 4.509710000  | 1.449173000  | 0.503994000  | 1                               | 3.585021000  | 1.913758000  | 1.928557000  |
| 6                               | -0.484136000 | 3.375855000  | -1.107430000 | 6                               | -1.572698000 | -0.979130000 | 1.931338000  |
| 1                               | -1.162068000 | 2.702366000  | -0.577895000 | 1                               | -2.050218000 | -0.008944000 | 2.097476000  |
| 1                               | -0.812013000 | 4.406061000  | -0.951174000 | 1                               | -1.575561000 | -1.545660000 | 2.869194000  |
| 1                               | -0.531433000 | 3.145954000  | -2.175518000 | 1                               | -0.543402000 | -0.794590000 | 1.622382000  |
| 6                               | 0.480487000  | -0.843349000 | 2.370880000  | 6                               | -2.459047000 | -3.636224000 | -2.108439000 |
| 1                               | -0.391147000 | -0.432343000 | 1.860030000  | 1                               | -1.613431000 | -3.142530000 | -2.588691000 |
| 1                               | 0.168046000  | -1.339589000 | 3.295627000  | 1                               | -2.244784000 | -4.707463000 | -2.025995000 |
| 1                               | 1.147286000  | -0.011634000 | 2.611562000  | 1                               | -3.356340000 | -3.505867000 | -2.720230000 |
| 6                               | 1.487236000  | -3.890881000 | -1.375815000 | 7                               | 3.957971000  | 1.641139000  | -1.275495000 |
| 1                               | 1.064517000  | -3.173525000 | -2.080676000 | 7                               | 4.208520000  | 0.788568000  | -1.927917000 |
| 1                               | 2.499432000  | -4.163739000 | -1.684102000 | 7                               | -1.160783000 | 0.720703000  | -0.416454000 |
| 1                               | 0.861445000  | -4.789557000 | -1.375065000 | 7                               | -0.481029000 | 3.083582000  | -0.452724000 |
| 7                               | -1.645614000 | 0.414175000  | 0.245284000  | 7                               | -2.577760000 | 2.566184000  | -0.108378000 |
| 7                               | -3.878892000 | 0.548906000  | 0.939113000  | 6                               | -1.331952000 | 1.989921000  | -0.353032000 |
| 7                               | -3.576997000 | -0.680401000 | -0.848382000 | 6                               | -1.194134000 | 4.281658000  | -0.306521000 |
| 6                               | -2.884783000 | 0.099127000  | 0.075763000  | 6                               | -2.490564000 | 3.957175000  | -0.084117000 |
| 6                               | -5.119853000 | 0.077327000  | 0.550986000  | 6                               | 0.927348000  | 2.993732000  | -0.749299000 |
| 1                               | -6.016312000 | 0.309942000  | 1.100438000  | 1                               | 1.461607000  | 3.815718000  | -0.266641000 |
| 6                               | -4.935376000 | -0.674095000 | -0.554545000 | 1                               | 1.313235000  | 2.053174000  | -0.355201000 |
| 1                               | -5.642035000 | -1.218657000 | -1.157709000 | 1                               | 1.128945000  | 3.032099000  | -1.826163000 |
| 6                               | -3.573566000 | 1.394433000  | 2.060836000  | 6                               | -3.767863000 | 1.781279000  | 0.076057000  |
| 1                               | -4.495998000 | 1.632135000  | 2.590687000  | 1                               | -3.485773000 | 0.735491000  | -0.063585000 |
| 1                               | -2.879996000 | 0.896040000  | 2.744531000  | 1                               | -4.184849000 | 1.908215000  | 1.082012000  |
| 1                               | -3.096149000 | 2.320997000  | 1.728719000  | 1                               | -4.539510000 | 2.044216000  | -0.654515000 |
| 6                               | -3.000944000 | -1.356908000 | -1.989805000 | 6                               | 5.769754000  | -0.288657000 | 1.928233000  |

|                                                      |              |              |              |                                                      |              |              |              |
|------------------------------------------------------|--------------|--------------|--------------|------------------------------------------------------|--------------|--------------|--------------|
| 1                                                    | -2.017310000 | -1.756527000 | -1.733192000 | 1                                                    | 6.002839000  | 0.777757000  | 1.821118000  |
| 1                                                    | -3.655794000 | -2.185905000 | -2.267384000 | 1                                                    | 5.625464000  | -0.475308000 | 2.998638000  |
| 1                                                    | -2.896129000 | -0.687779000 | -2.848906000 | 1                                                    | 6.650738000  | -0.850162000 | 1.614908000  |
| 7                                                    | 3.020731000  | -0.503201000 | -2.007524000 | 6                                                    | 5.445685000  | -2.468731000 | -0.521441000 |
| 7                                                    | 3.507051000  | -1.197308000 | -1.302474000 | 1                                                    | 6.436318000  | -2.304241000 | -0.095249000 |
|                                                      |              |              |              | 1                                                    | 5.206234000  | -3.530236000 | -0.389159000 |
|                                                      |              |              |              | 1                                                    | 5.515133000  | -2.289139000 | -1.600639000 |
|                                                      |              |              |              | 6                                                    | -0.528245000 | 5.600481000  | -0.383063000 |
|                                                      |              |              |              | 1                                                    | -0.004270000 | 5.745540000  | -1.334784000 |
|                                                      |              |              |              | 1                                                    | -1.262652000 | 6.401568000  | -0.288409000 |
|                                                      |              |              |              | 1                                                    | 0.213061000  | 5.743467000  | 0.412350000  |
|                                                      |              |              |              | 6                                                    | -3.677614000 | 4.806722000  | 0.156948000  |
|                                                      |              |              |              | 1                                                    | -4.137056000 | 4.609050000  | 1.132468000  |
|                                                      |              |              |              | 1                                                    | -3.405088000 | 5.862539000  | 0.132319000  |
|                                                      |              |              |              | 1                                                    | -4.457584000 | 4.651029000  | -0.597331000 |
|                                                      |              |              |              | 6                                                    | -4.813283000 | -4.109340000 | -0.267771000 |
|                                                      |              |              |              | 1                                                    | -5.541637000 | -4.118595000 | 0.544138000  |
|                                                      |              |              |              | 1                                                    | -5.342589000 | -3.810856000 | -1.180326000 |
|                                                      |              |              |              | 1                                                    | -4.477816000 | -5.141452000 | -0.420066000 |
|                                                      |              |              |              | 6                                                    | -4.279336000 | -2.153351000 | 2.334862000  |
|                                                      |              |              |              | 1                                                    | -3.759615000 | -2.440731000 | 3.256080000  |
|                                                      |              |              |              | 1                                                    | -4.543037000 | -1.094076000 | 2.439242000  |
|                                                      |              |              |              | 1                                                    | -5.209355000 | -2.722246000 | 2.294296000  |
| <b>P(Im<sup>a</sup>CH)<sub>3</sub>…N<sub>2</sub></b> |              |              |              | <b>P(Im<sup>b</sup>CH)<sub>3</sub>…N<sub>2</sub></b> |              |              |              |
| 15                                                   | -0.657467000 | -0.474563000 | 0.099366000  | 15                                                   | 0.177830000  | -1.893868000 | 1.397466000  |
| 6                                                    | 0.321577000  | 0.602331000  | 1.177936000  | 6                                                    | 0.110463000  | -0.112334000 | 1.786581000  |
| 7                                                    | 1.278554000  | 2.064890000  | -0.556464000 | 7                                                    | -0.497421000 | 0.955690000  | -0.367023000 |
| 7                                                    | 1.618728000  | 2.707167000  | 1.490041000  | 7                                                    | -0.427224000 | 2.278140000  | 1.386897000  |
| 6                                                    | 0.440023000  | -0.699196000 | -1.343953000 | 6                                                    | -0.238925000 | 0.949636000  | 1.005622000  |
| 7                                                    | 2.564214000  | -1.680150000 | -2.208228000 | 6                                                    | -1.119553000 | 2.169365000  | -0.721118000 |
| 7                                                    | 2.480689000  | -1.240252000 | -0.077143000 | 6                                                    | -1.068350000 | 2.985620000  | 0.352099000  |
| 6                                                    | 1.006047000  | 1.713865000  | 0.746982000  | 1                                                    | -0.772230000 | 0.056373000  | -0.769436000 |
| 6                                                    | 2.099134000  | 3.181084000  | -0.605471000 | 1                                                    | -0.557270000 | 2.511916000  | 2.358261000  |
| 1                                                    | 2.439649000  | 3.600602000  | -1.536037000 | 6                                                    | -1.451730000 | 4.403410000  | 0.523089000  |
| 6                                                    | 2.302761000  | 3.593577000  | 0.662024000  | 1                                                    | -1.933739000 | 4.784360000  | -0.378098000 |
| 1                                                    | 2.841430000  | 4.440542000  | 1.049198000  | 1                                                    | -2.153194000 | 4.542205000  | 1.354074000  |
| 6                                                    | 1.715817000  | -1.186118000 | -1.227678000 | 1                                                    | -0.582994000 | 5.038892000  | 0.729907000  |
| 6                                                    | 3.839711000  | -1.897032000 | -1.689213000 | 6                                                    | -1.607463000 | 2.379943000  | -2.100382000 |
| 1                                                    | 4.645746000  | -2.275216000 | -2.293425000 | 1                                                    | -0.796925000 | 2.312512000  | -2.835656000 |
| 6                                                    | 3.783111000  | -1.621045000 | -0.371708000 | 1                                                    | -2.351977000 | 1.623519000  | -2.377268000 |
| 1                                                    | 4.538299000  | -1.707497000 | 0.390072000  | 1                                                    | -2.074542000 | 3.359867000  | -2.207055000 |
| 7                                                    | 0.496797000  | -2.556082000 | 3.228529000  | 1                                                    | 0.306014000  | 0.121355000  | 2.831187000  |
| 7                                                    | 1.415519000  | -2.027333000 | 2.925870000  | 6                                                    | 1.860101000  | -2.255799000 | 0.893911000  |
| 1                                                    | 2.324072000  | -1.684265000 | -3.183354000 | 7                                                    | 2.279132000  | -0.382676000 | -0.657456000 |
| 1                                                    | 2.153460000  | -0.765176000 | 0.759997000  | 7                                                    | 3.980877000  | -1.663316000 | -0.246342000 |
| 1                                                    | 1.087706000  | 1.380650000  | -1.291019000 | 6                                                    | 2.636808000  | -1.500774000 | 0.058532000  |
| 1                                                    | 1.596597000  | 2.736821000  | 2.493631000  | 6                                                    | 3.391547000  | 0.215742000  | -1.251883000 |
| 6                                                    | -1.952348000 | 0.549427000  | -0.605226000 | 6                                                    | 4.457997000  | -0.574317000 | -0.993039000 |
| 7                                                    | -4.405300000 | 0.840430000  | -0.873260000 | 1                                                    | 1.391790000  | 0.086368000  | -0.536965000 |
| 7                                                    | -3.745860000 | -1.002835000 | 0.077540000  | 1                                                    | 4.570873000  | -2.259482000 | 0.309877000  |
| 6                                                    | -3.256820000 | 0.166749000  | -0.478500000 | 6                                                    | 5.875519000  | -0.478323000 | -1.400192000 |
| 6                                                    | -5.546154000 | 0.163715000  | -0.435120000 | 1                                                    | 6.049435000  | 0.434286000  | -1.971707000 |
| 1                                                    | -6.538541000 | 0.527716000  | -0.635970000 | 1                                                    | 6.550578000  | -0.457120000 | -0.536252000 |
| 6                                                    | -5.132159000 | -0.978115000 | 0.145551000  | 1                                                    | 6.182767000  | -1.324363000 | -2.025812000 |

|                                                      |              |              |              |                                                      |              |              |              |
|------------------------------------------------------|--------------|--------------|--------------|------------------------------------------------------|--------------|--------------|--------------|
| 1                                                    | -5.698583000 | -1.797460000 | 0.552948000  | 6                                                    | 3.249621000  | 1.478664000  | -2.006629000 |
| 1                                                    | -4.382535000 | 1.812991000  | -1.125473000 | 1                                                    | 2.588286000  | 1.366147000  | -2.873871000 |
| 1                                                    | -3.119066000 | -1.636720000 | 0.551728000  | 1                                                    | 2.818545000  | 2.266320000  | -1.376457000 |
| 1                                                    | -0.058046000 | -0.830346000 | -2.300179000 | 1                                                    | 4.216625000  | 1.830979000  | -2.367843000 |
| 1                                                    | 0.136511000  | 0.526974000  | 2.245336000  | 1                                                    | 2.341085000  | -3.096395000 | 1.382633000  |
| 1                                                    | -1.752256000 | 1.512522000  | -1.069883000 | 6                                                    | -0.769924000 | -2.001884000 | -0.158657000 |
|                                                      |              |              |              | 7                                                    | -2.817783000 | -1.024988000 | 0.770099000  |
|                                                      |              |              |              | 7                                                    | -3.021124000 | -1.869024000 | -1.236209000 |
|                                                      |              |              |              | 6                                                    | -2.101728000 | -1.698403000 | -0.204096000 |
|                                                      |              |              |              | 6                                                    | -4.121233000 | -0.755421000 | 0.338096000  |
|                                                      |              |              |              | 6                                                    | -4.268536000 | -1.325393000 | -0.877983000 |
|                                                      |              |              |              | 1                                                    | -2.332499000 | -0.545348000 | 1.518472000  |
|                                                      |              |              |              | 1                                                    | -2.916560000 | -2.611349000 | -1.908116000 |
|                                                      |              |              |              | 6                                                    | -5.428458000 | -1.405376000 | -1.790439000 |
|                                                      |              |              |              | 1                                                    | -6.297310000 | -0.912383000 | -1.352690000 |
|                                                      |              |              |              | 1                                                    | -5.224743000 | -0.926015000 | -2.755126000 |
|                                                      |              |              |              | 1                                                    | -5.715872000 | -2.442065000 | -2.003682000 |
|                                                      |              |              |              | 6                                                    | -5.054573000 | 0.029004000  | 1.173449000  |
|                                                      |              |              |              | 1                                                    | -5.215629000 | -0.440143000 | 2.150228000  |
|                                                      |              |              |              | 1                                                    | -4.676780000 | 1.041320000  | 1.362202000  |
|                                                      |              |              |              | 1                                                    | -6.025773000 | 0.125710000  | 0.686668000  |
|                                                      |              |              |              | 1                                                    | -0.335478000 | -2.553887000 | -0.985788000 |
|                                                      |              |              |              | 7                                                    | 3.177112000  | 1.221625000  | 1.729348000  |
|                                                      |              |              |              | 7                                                    | 3.636509000  | 0.406589000  | 2.314196000  |
| <b>P(Im<sup>c</sup>CH)<sub>3</sub>…N<sub>2</sub></b> |              |              |              | <b>P(Im<sup>d</sup>CH)<sub>3</sub>…N<sub>2</sub></b> |              |              |              |
| 15                                                   | -0.169249000 | -0.398751000 | -0.807323000 | 15                                                   | -0.217980000 | -0.679705000 | -1.056416000 |
| 6                                                    | 1.236460000  | -1.516205000 | -0.574259000 | 6                                                    | -1.657607000 | -1.764376000 | -0.900581000 |
| 7                                                    | 2.346470000  | -0.958002000 | 1.599859000  | 7                                                    | -3.165029000 | -0.804431000 | 0.845522000  |
| 7                                                    | 3.546469000  | -2.022551000 | 0.098197000  | 7                                                    | -4.084298000 | -2.091330000 | -0.669761000 |
| 6                                                    | 0.541479000  | 1.167517000  | -0.238578000 | 6                                                    | 0.797975000  | -0.621248000 | 0.454726000  |
| 7                                                    | 0.555986000  | 3.523894000  | 0.416129000  | 7                                                    | 2.573406000  | -2.303886000 | -0.025964000 |
| 7                                                    | -1.307700000 | 2.840447000  | -0.548285000 | 7                                                    | 3.079780000  | -0.696430000 | 1.374043000  |
| 6                                                    | 2.281690000  | -1.485000000 | 0.316240000  | 6                                                    | -2.867311000 | -1.557017000 | -0.276164000 |
| 6                                                    | 3.591495000  | -1.237276000 | 2.157577000  | 6                                                    | -4.534071000 | -0.891607000 | 1.135338000  |
| 1                                                    | 3.842382000  | -0.913522000 | 3.153389000  | 6                                                    | -5.103477000 | -1.684671000 | 0.197030000  |
| 6                                                    | 4.326219000  | -1.891929000 | 1.237949000  | 6                                                    | 2.050973000  | -1.168803000 | 0.573446000  |
| 1                                                    | 5.344741000  | -2.240765000 | 1.268716000  | 6                                                    | 3.873867000  | -2.538330000 | 0.434658000  |
| 6                                                    | -0.044533000 | 2.397991000  | -0.148320000 | 6                                                    | 4.190608000  | -1.541833000 | 1.296474000  |
| 6                                                    | -0.274457000 | 4.627293000  | 0.280274000  | 6                                                    | 1.769660000  | -3.260688000 | -0.751257000 |
| 1                                                    | 0.003938000  | 5.593035000  | 0.667628000  | 1                                                    | 1.765164000  | -3.066636000 | -1.827336000 |
| 6                                                    | -1.407012000 | 4.213868000  | -0.317429000 | 1                                                    | 2.150229000  | -4.269477000 | -0.572956000 |
| 1                                                    | -2.304025000 | 4.754947000  | -0.567139000 | 1                                                    | 0.736893000  | -3.201962000 | -0.393090000 |
| 6                                                    | 1.900417000  | 3.519910000  | 0.912942000  | 6                                                    | 2.975205000  | 0.531350000  | 2.109572000  |
| 1                                                    | 2.126260000  | 4.493783000  | 1.347281000  | 1                                                    | 2.544349000  | 1.311820000  | 1.470163000  |
| 1                                                    | 2.024554000  | 2.751613000  | 1.686057000  | 1                                                    | 2.326678000  | 0.429948000  | 2.989388000  |
| 1                                                    | 2.625507000  | 3.309846000  | 0.116819000  | 1                                                    | 3.963798000  | 0.846888000  | 2.443577000  |
| 6                                                    | -2.105094000 | 2.171383000  | -1.552355000 | 6                                                    | -2.154929000 | -0.396427000 | 1.797189000  |
| 1                                                    | -2.355649000 | 1.156994000  | -1.237325000 | 1                                                    | -1.737800000 | 0.585645000  | 1.553025000  |
| 1                                                    | -3.028871000 | 2.736064000  | -1.689425000 | 1                                                    | -2.588122000 | -0.368175000 | 2.798442000  |
| 1                                                    | -1.579034000 | 2.114849000  | -2.512680000 | 1                                                    | -1.330471000 | -1.114270000 | 1.776690000  |
| 6                                                    | 1.167946000  | -0.674921000 | 2.392224000  | 6                                                    | -4.229959000 | -2.889898000 | -1.852973000 |
| 1                                                    | 0.408586000  | -1.443748000 | 2.218009000  | 1                                                    | -3.757927000 | -2.389020000 | -2.705515000 |
| 1                                                    | 1.449628000  | -0.669619000 | 3.446170000  | 1                                                    | -3.758884000 | -3.873919000 | -1.740822000 |
| 1                                                    | 0.730274000  | 0.290575000  | 2.125773000  | 1                                                    | -5.287506000 | -3.037597000 | -2.069772000 |

|   |              |              |              |   |              |              |              |
|---|--------------|--------------|--------------|---|--------------|--------------|--------------|
| 6 | 3.904974000  | -2.732143000 | -1.097328000 | 7 | 4.823877000  | -0.413832000 | -1.576859000 |
| 1 | 3.660882000  | -2.133997000 | -1.980186000 | 7 | 4.040337000  | -0.760984000 | -2.272944000 |
| 1 | 4.976845000  | -2.929857000 | -1.088955000 | 6 | -1.002757000 | 0.950900000  | -0.932859000 |
| 1 | 3.371573000  | -3.687177000 | -1.178307000 | 7 | 0.920992000  | 2.529215000  | -0.609431000 |
| 1 | 1.445542000  | -2.094404000 | -1.470522000 | 7 | -1.132068000 | 3.323713000  | -0.358492000 |
| 1 | 1.572206000  | 1.128603000  | 0.098599000  | 6 | -0.429785000 | 2.161902000  | -0.675265000 |
| 6 | -1.460587000 | -0.650020000 | 0.452167000  | 6 | 1.006619000  | 3.906663000  | -0.310070000 |
| 7 | -3.841601000 | -1.039974000 | 0.939569000  | 6 | -0.245343000 | 4.383669000  | -0.139779000 |
| 7 | -3.022503000 | -2.189509000 | -0.742406000 | 6 | 1.910064000  | 1.920321000  | -1.475884000 |
| 6 | -2.671097000 | -1.251217000 | 0.219611000  | 1 | 2.910002000  | 2.088439000  | -1.067264000 |
| 6 | -4.863853000 | -1.835360000 | 0.440511000  | 1 | 1.745460000  | 0.845967000  | -1.537736000 |
| 1 | -5.854983000 | -1.813145000 | 0.860853000  | 1 | 1.871690000  | 2.335846000  | -2.493448000 |
| 6 | -4.359810000 | -2.541835000 | -0.590510000 | 6 | -2.559251000 | 3.351054000  | -0.253157000 |
| 1 | -4.825812000 | -3.265312000 | -1.237390000 | 1 | -2.912266000 | 2.563435000  | 0.426974000  |
| 6 | -3.949513000 | -0.045145000 | 1.966800000  | 1 | -2.883879000 | 4.317916000  | 0.130967000  |
| 1 | -4.991304000 | 0.045054000  | 2.274126000  | 1 | -3.043236000 | 3.183068000  | -1.224451000 |
| 1 | -3.346470000 | -0.304530000 | 2.844927000  | 6 | 5.455918000  | -1.242368000 | 1.999322000  |
| 1 | -3.598986000 | 0.926296000  | 1.596288000  | 1 | 5.898779000  | -0.295666000 | 1.664825000  |
| 6 | -2.072103000 | -2.942105000 | -1.529843000 | 1 | 5.324643000  | -1.171639000 | 3.085073000  |
| 1 | -1.132058000 | -3.024994000 | -0.975360000 | 1 | 6.189201000  | -2.027081000 | 1.809733000  |
| 1 | -2.471231000 | -3.944569000 | -1.706451000 | 6 | 4.687037000  | -3.664137000 | -0.073459000 |
| 1 | -1.856755000 | -2.466125000 | -2.489167000 | 1 | 5.700841000  | -3.613006000 | 0.326076000  |
| 1 | -1.422109000 | -0.025046000 | 1.341204000  | 1 | 4.278814000  | -4.643345000 | 0.202006000  |
| 7 | 3.110922000  | 0.354048000  | -2.703540000 | 1 | 4.759315000  | -3.647701000 | -1.167989000 |
| 7 | 3.364441000  | 1.187015000  | -2.026540000 | 6 | 2.318905000  | 4.576989000  | -0.180175000 |
|   |              |              |              | 1 | 2.887335000  | 4.576363000  | -1.117854000 |
|   |              |              |              | 1 | 2.189456000  | 5.617832000  | 0.120116000  |
|   |              |              |              | 1 | 2.952515000  | 4.091689000  | 0.573074000  |
|   |              |              |              | 6 | -0.718641000 | 5.725553000  | 0.263401000  |
|   |              |              |              | 1 | -1.265535000 | 5.708348000  | 1.214275000  |
|   |              |              |              | 1 | 0.126193000  | 6.404230000  | 0.385791000  |
|   |              |              |              | 1 | -1.389187000 | 6.167952000  | -0.482293000 |
|   |              |              |              | 6 | -6.514310000 | -2.079250000 | -0.005815000 |
|   |              |              |              | 1 | -7.141515000 | -1.655332000 | 0.779316000  |
|   |              |              |              | 1 | -6.914194000 | -1.730963000 | -0.965925000 |
|   |              |              |              | 1 | -6.648434000 | -3.166769000 | 0.020803000  |
|   |              |              |              | 6 | -5.135753000 | -0.173624000 | 2.280381000  |
|   |              |              |              | 1 | -4.788052000 | -0.551117000 | 3.249298000  |
|   |              |              |              | 1 | -4.904205000 | 0.897621000  | 2.256076000  |
|   |              |              |              | 1 | -6.221635000 | -0.277325000 | 2.266188000  |
|   |              |              |              | 1 | 0.598435000  | 0.202405000  | 1.136278000  |
|   |              |              |              | 1 | -2.085808000 | 0.951770000  | -1.002318000 |
|   |              |              |              | 1 | -1.692233000 | -2.509600000 | -1.690542000 |

**Table S5:** Cartesian coordinates of optimized geometries of mono-phosphine-N<sub>2</sub> hypervalent complexes at M06L/6-311++G(d,p) level DFT. Atomic number followed by X, Y, Z coordinates in Å.

| (Im <sup>c</sup> N) <sub>3</sub> P–N <sub>2</sub> |              |             |              | (Im <sup>d</sup> N) <sub>3</sub> P–N <sub>2</sub> |              |              |              |
|---------------------------------------------------|--------------|-------------|--------------|---------------------------------------------------|--------------|--------------|--------------|
| 15                                                | 0.085593000  | 0.139665000 | -0.715085000 | 15                                                | -0.000377000 | -0.277544000 | -0.806758000 |
| 7                                                 | 1.453550000  | 1.033044000 | -0.892008000 | 7                                                 | -1.158071000 | -1.452864000 | -0.854879000 |
| 7                                                 | 2.700639000  | 1.062861000 | 1.222555000  | 7                                                 | -2.509176000 | -1.351166000 | 1.182182000  |
| 7                                                 | 3.784402000  | 1.239817000 | -0.665137000 | 7                                                 | -3.472162000 | -1.875726000 | -0.696545000 |
| 7                                                 | -1.102761000 | 0.703649000 | 0.316349000  | 7                                                 | 1.268455000  | -0.300397000 | 0.293254000  |
| 7                                                 | -2.546304000 | 2.570452000 | 0.560572000  | 7                                                 | 2.570749000  | -2.326898000 | -0.201635000 |

|   |              |              |              |   |              |              |              |
|---|--------------|--------------|--------------|---|--------------|--------------|--------------|
| 7 | -3.331322000 | 0.919162000  | -0.630625000 | 7 | 3.596980000  | -0.553571000 | 0.529886000  |
| 6 | 2.511066000  | 1.066389000  | -0.146104000 | 6 | -2.257198000 | -1.501133000 | -0.161671000 |
| 6 | 4.044611000  | 1.224382000  | 1.519069000  | 6 | -3.851834000 | -1.611508000 | 1.462965000  |
| 1 | 4.397811000  | 1.244013000  | 2.536154000  | 6 | -4.450353000 | -1.946028000 | 0.291654000  |
| 6 | 4.713919000  | 1.339630000  | 0.351889000  | 6 | 2.350658000  | -1.024902000 | 0.176655000  |
| 1 | 5.762784000  | 1.482143000  | 0.154142000  | 6 | 3.924853000  | -2.647059000 | -0.087508000 |
| 6 | -2.204822000 | 1.332418000  | 0.055504000  | 6 | 4.563844000  | -1.543953000 | 0.378670000  |
| 6 | -3.843446000 | 2.896542000  | 0.210967000  | 6 | 1.540381000  | -3.274130000 | -0.569022000 |
| 1 | -4.302772000 | 3.821615000  | 0.515166000  | 1 | 1.500962000  | -3.409660000 | -1.652202000 |
| 6 | -4.324948000 | 1.877867000  | -0.536688000 | 1 | 1.737030000  | -4.230996000 | -0.078317000 |
| 1 | -5.283006000 | 1.749978000  | -1.011167000 | 1 | 0.569131000  | -2.891408000 | -0.257004000 |
| 6 | -1.617218000 | 3.366418000  | 1.322168000  | 6 | 3.819209000  | 0.801217000  | 0.963797000  |
| 1 | -1.947767000 | 4.404861000  | 1.322760000  | 1 | 2.954348000  | 1.389419000  | 0.654568000  |
| 1 | -1.541125000 | 3.013787000  | 2.356058000  | 1 | 3.916772000  | 0.869244000  | 2.053390000  |
| 1 | -0.628250000 | 3.298778000  | 0.864332000  | 1 | 4.724071000  | 1.204285000  | 0.504221000  |
| 6 | -3.453032000 | -0.354254000 | -1.299168000 | 6 | -1.517988000 | -1.009787000 | 2.173058000  |
| 1 | -2.764233000 | -1.061739000 | -0.831063000 | 1 | -1.618728000 | 0.032036000  | 2.488017000  |
| 1 | -4.475114000 | -0.722115000 | -1.192658000 | 1 | -1.618854000 | -1.670650000 | 3.039170000  |
| 1 | -3.192212000 | -0.278833000 | -2.357482000 | 1 | -0.523030000 | -1.124133000 | 1.740938000  |
| 6 | 1.656418000  | 0.996529000  | 2.219356000  | 6 | -3.662839000 | -2.104626000 | -2.105380000 |
| 1 | 1.611716000  | 0.003897000  | 2.673499000  | 1 | -2.692744000 | -1.968952000 | -2.583644000 |
| 1 | 1.848195000  | 1.750107000  | 2.989274000  | 1 | -4.020508000 | -3.120455000 | -2.297589000 |
| 1 | 0.692015000  | 1.185372000  | 1.747854000  | 1 | -4.378558000 | -1.393565000 | -2.528741000 |
| 6 | 4.051764000  | 1.288613000  | -2.080049000 | 7 | 0.502014000  | 0.208778000  | -2.375659000 |
| 1 | 3.092046000  | 1.212907000  | -2.590684000 | 7 | 0.935946000  | -0.991113000 | -2.232763000 |
| 1 | 4.533379000  | 2.231029000  | -2.354309000 | 7 | -0.913265000 | 0.971758000  | -0.069580000 |
| 1 | 4.693688000  | 0.458214000  | -2.386797000 | 7 | -0.716244000 | 3.163190000  | -1.047189000 |
| 7 | -0.424313000 | -0.547046000 | -2.206555000 | 7 | 0.063259000  | 2.913567000  | 0.972023000  |
| 7 | -0.669071000 | 0.715978000  | -2.262018000 | 6 | -0.541980000 | 2.207738000  | -0.057754000 |
| 7 | 0.680533000  | -1.116402000 | 0.289355000  | 6 | -0.247659000 | 4.406972000  | -0.632388000 |
| 7 | 0.157055000  | -3.364897000 | -0.408355000 | 6 | 0.226555000  | 4.255132000  | 0.632922000  |
| 7 | -0.711774000 | -2.682588000 | 1.476945000  | 6 | -1.260431000 | 2.838256000  | -2.341016000 |
| 6 | 0.094471000  | -2.253876000 | 0.426028000  | 1 | -1.902927000 | 3.646747000  | -2.696905000 |
| 6 | -0.562657000 | -4.417557000 | 0.123461000  | 1 | -0.473553000 | 2.634645000  | -3.074838000 |
| 1 | -0.629564000 | -5.372503000 | -0.370746000 | 1 | -1.844221000 | 1.922561000  | -2.226854000 |
| 6 | -1.093153000 | -3.998541000 | 1.296938000  | 6 | 0.398794000  | 2.294775000  | 2.228090000  |
| 1 | -1.701342000 | -4.523478000 | 2.014783000  | 1 | 0.543170000  | 1.228486000  | 2.039722000  |
| 6 | 0.869977000  | -3.354083000 | -1.661364000 | 1 | 1.326979000  | 2.717118000  | 2.620570000  |
| 1 | 1.349592000  | -4.321230000 | -1.825130000 | 1 | -0.389902000 | 2.437538000  | 2.977605000  |
| 1 | 0.209064000  | -3.113182000 | -2.499109000 | 6 | 5.991633000  | -1.297686000 | 0.676962000  |
| 1 | 1.625421000  | -2.567944000 | -1.601567000 | 1 | 6.421276000  | -0.519317000 | 0.035849000  |
| 6 | -1.040366000 | -1.830365000 | 2.591366000  | 1 | 6.147061000  | -0.979268000 | 1.713780000  |
| 1 | -0.888756000 | -0.798106000 | 2.269236000  | 1 | 6.575569000  | -2.205527000 | 0.521876000  |
| 1 | -2.086310000 | -1.969154000 | 2.873996000  | 6 | 4.443976000  | -3.983307000 | -0.453378000 |
| 1 | -0.409108000 | -2.042257000 | 3.461926000  | 1 | 5.529384000  | -4.011132000 | -0.350164000 |
|   |              |              |              | 1 | 4.034262000  | -4.779553000 | 0.178279000  |
|   |              |              |              | 1 | 4.202491000  | -4.241777000 | -1.489723000 |
|   |              |              |              | 6 | -0.316376000 | 5.601281000  | -1.503778000 |
|   |              |              |              | 1 | -1.347991000 | 5.871643000  | -1.757523000 |
|   |              |              |              | 1 | 0.134296000  | 6.463346000  | -1.010067000 |
|   |              |              |              | 1 | 0.213600000  | 5.448328000  | -2.450472000 |
|   |              |              |              | 6 | 0.831396000  | 5.233622000  | 1.564088000  |
|   |              |              |              | 1 | 1.864066000  | 4.973905000  | 1.826442000  |
|   |              |              |              | 1 | 0.851202000  | 6.227593000  | 1.115148000  |
|   |              |              |              | 1 | 0.274847000  | 5.309222000  | 2.505366000  |

|  |   |              |              |              |
|--|---|--------------|--------------|--------------|
|  | 6 | -5.847274000 | -2.322487000 | -0.017483000 |
|  | 1 | -6.457418000 | -2.304501000 | 0.886268000  |
|  | 1 | -6.308628000 | -1.639591000 | -0.739688000 |
|  | 1 | -5.919225000 | -3.330132000 | -0.442131000 |
|  | 6 | -4.396217000 | -1.505825000 | 2.834481000  |
|  | 1 | -3.930441000 | -2.217984000 | 3.525321000  |
|  | 1 | -4.246042000 | -0.506741000 | 3.258119000  |
|  | 1 | -5.468393000 | -1.705898000 | 2.835139000  |

**Table S6:** Cartesian coordinates of optimized geometries of bis-phosphine-N<sub>2</sub> complexes at M06L/6-311++G(d,p) level DFT. Atomic number followed by X, Y, Z coordinates in Å.

|                                                                         |              |              |              |                                                                         |              |              |              |
|-------------------------------------------------------------------------|--------------|--------------|--------------|-------------------------------------------------------------------------|--------------|--------------|--------------|
| <b>H<sub>3</sub>P–NN–PH<sub>3</sub></b>                                 |              |              |              | <b>Me<sub>3</sub>P–NN–PMe<sub>3</sub></b>                               |              |              |              |
| 15                                                                      | 1.965802000  | 0.026825000  | 0.001648000  | 15                                                                      | 1.940465000  | -0.048916000 | -0.001563000 |
| 7                                                                       | -0.487187000 | 0.544335000  | -0.005079000 | 7                                                                       | -0.449965000 | 0.597628000  | -0.017328000 |
| 15                                                                      | -1.965799000 | -0.026840000 | 0.001647000  | 15                                                                      | -1.940408000 | 0.048893000  | -0.001551000 |
| 7                                                                       | 0.487174000  | -0.544286000 | -0.005077000 | 7                                                                       | 0.450048000  | -0.597766000 | -0.017793000 |
| 1                                                                       | 2.822521000  | -1.075303000 | -0.003390000 | 6                                                                       | 2.438828000  | 1.008570000  | -1.405885000 |
| 1                                                                       | 2.460216000  | 0.840029000  | -1.068492000 | 1                                                                       | 1.729466000  | 1.837370000  | -1.456587000 |
| 1                                                                       | 2.457742000  | 0.827323000  | 1.082721000  | 1                                                                       | 3.451384000  | 1.406722000  | -1.301904000 |
| 1                                                                       | -2.822573000 | 1.075249000  | -0.003466000 | 1                                                                       | 2.364066000  | 0.439652000  | -2.334119000 |
| 1                                                                       | -2.457740000 | -0.827294000 | 1.082753000  | 6                                                                       | 3.049466000  | -1.471158000 | -0.008262000 |
| 1                                                                       | -2.460117000 | -0.840136000 | -1.068461000 | 1                                                                       | 2.869757000  | -2.072029000 | -0.900130000 |
|                                                                         |              |              |              | 1                                                                       | 4.092495000  | -1.148104000 | 0.000809000  |
|                                                                         |              |              |              | 1                                                                       | 2.859565000  | -2.088426000 | 0.870224000  |
|                                                                         |              |              |              | 6                                                                       | 2.422034000  | 0.980613000  | 1.429544000  |
|                                                                         |              |              |              | 1                                                                       | 3.435714000  | 1.380694000  | 1.345617000  |
|                                                                         |              |              |              | 1                                                                       | 1.712191000  | 1.808490000  | 1.488203000  |
|                                                                         |              |              |              | 1                                                                       | 2.336516000  | 0.393348000  | 2.345365000  |
|                                                                         |              |              |              | 6                                                                       | -3.049341000 | 1.471199000  | -0.008308000 |
|                                                                         |              |              |              | 1                                                                       | -2.870724000 | 2.071214000  | -0.900971000 |
|                                                                         |              |              |              | 1                                                                       | -4.092363000 | 1.148163000  | 0.002337000  |
|                                                                         |              |              |              | 1                                                                       | -2.858367000 | 2.089300000  | 0.869358000  |
|                                                                         |              |              |              | 6                                                                       | -2.438390000 | -1.008242000 | -1.406236000 |
|                                                                         |              |              |              | 1                                                                       | -3.450792000 | -1.406829000 | -1.302433000 |
|                                                                         |              |              |              | 1                                                                       | -2.363846000 | -0.438924000 | -2.334244000 |
|                                                                         |              |              |              | 1                                                                       | -1.728676000 | -1.836721000 | -1.457248000 |
|                                                                         |              |              |              | 6                                                                       | -2.422711000 | -0.980849000 | 1.429202000  |
|                                                                         |              |              |              | 1                                                                       | -1.713769000 | -1.809514000 | 1.487538000  |
|                                                                         |              |              |              | 1                                                                       | -2.336571000 | -0.394034000 | 2.345251000  |
|                                                                         |              |              |              | 1                                                                       | -3.436811000 | -1.379854000 | 1.345158000  |
| <b>(Im<sup>a</sup>N)<sub>3</sub>P–NN–P(Im<sup>a</sup>N)<sub>3</sub></b> |              |              |              | <b>(Im<sup>b</sup>N)<sub>3</sub>P–NN–P(Im<sup>b</sup>N)<sub>3</sub></b> |              |              |              |
| 15                                                                      | 2.017339000  | -0.142235000 | -0.332954000 | 7                                                                       | -0.640852000 | 0.091184000  | -0.519389000 |
| 7                                                                       | 2.302387000  | -1.029840000 | -1.691925000 | 7                                                                       | 0.549932000  | 0.349486000  | 0.315229000  |
| 7                                                                       | 0.313378000  | -2.430599000 | -1.813688000 | 15                                                                      | -1.940868000 | -0.451232000 | 0.306127000  |
| 7                                                                       | 2.036658000  | -2.964155000 | -3.023599000 | 7                                                                       | -3.092950000 | -0.483482000 | -0.884561000 |
| 7                                                                       | 2.440218000  | 1.425387000  | -0.798019000 | 7                                                                       | -5.364360000 | -0.810106000 | -1.468677000 |
| 7                                                                       | 1.799384000  | 3.484918000  | -1.790539000 | 7                                                                       | -4.969454000 | -0.678194000 | 0.653974000  |
| 7                                                                       | 0.231533000  | 1.993090000  | -1.642818000 | 6                                                                       | -4.338524000 | -0.643503000 | -0.566315000 |
| 6                                                                       | 1.591998000  | -2.044435000 | -2.102498000 | 6                                                                       | -6.599143000 | -0.913278000 | -0.823255000 |
| 6                                                                       | -0.037276000 | -3.524644000 | -2.579441000 | 6                                                                       | -6.348620000 | -0.817705000 | 0.506192000  |
| 1                                                                       | -1.014145000 | -3.972763000 | -2.513004000 | 1                                                                       | -5.198894000 | -0.847400000 | -2.459963000 |
| 6                                                                       | 1.031667000  | -3.871887000 | -3.331870000 | 1                                                                       | -4.444488000 | -0.409779000 | 1.483249000  |

|    |              |              |              |    |              |              |              |
|----|--------------|--------------|--------------|----|--------------|--------------|--------------|
| 1  | 1.174766000  | -4.673119000 | -4.035767000 | 6  | -7.254688000 | -0.870312000 | 1.674275000  |
| 6  | 1.553373000  | 2.200631000  | -1.362931000 | 1  | -8.290777000 | -0.990892000 | 1.355159000  |
| 6  | 0.636742000  | 4.070929000  | -2.278945000 | 1  | -7.012094000 | -1.705923000 | 2.339585000  |
| 1  | 0.615277000  | 5.078474000  | -2.655775000 | 1  | -7.200961000 | 0.043736000  | 2.276296000  |
| 6  | -0.331755000 | 3.133874000  | -2.180122000 | 6  | -7.857021000 | -1.112959000 | -1.574291000 |
| 1  | -1.373633000 | 3.175078000  | -2.449323000 | 1  | -8.050160000 | -0.295687000 | -2.278506000 |
| 7  | -0.590843000 | -0.324188000 | -0.442040000 | 1  | -7.847354000 | -2.042093000 | -2.155790000 |
| 15 | -2.017454000 | -0.143400000 | 0.332586000  | 1  | -8.706808000 | -1.163957000 | -0.892588000 |
| 7  | -2.301926000 | -1.030401000 | 1.692062000  | 7  | -1.910800000 | -2.008110000 | 0.893331000  |
| 7  | -0.311772000 | -2.429429000 | 1.815278000  | 7  | 0.446343000  | -2.126271000 | 1.486590000  |
| 7  | -2.034911000 | -2.963632000 | 3.025052000  | 7  | -0.726681000 | -3.944629000 | 1.562229000  |
| 7  | -2.440938000 | 1.424435000  | 0.796834000  | 6  | -0.818430000 | -2.599573000 | 1.286369000  |
| 7  | -1.801368000 | 3.483649000  | 1.790899000  | 6  | 1.326802000  | -3.167075000 | 1.761799000  |
| 7  | -0.233271000 | 1.991939000  | 1.644450000  | 6  | 0.600733000  | -4.313102000 | 1.809794000  |
| 6  | -1.590754000 | -2.044124000 | 2.103468000  | 1  | 0.692508000  | -1.142055000 | 1.214835000  |
| 6  | 0.039576000  | -3.522745000 | 2.581764000  | 1  | -1.496531000 | -4.570547000 | 1.394745000  |
| 1  | 1.016843000  | -3.970065000 | 2.515862000  | 6  | 0.982911000  | -5.716602000 | 2.072977000  |
| 6  | -1.029279000 | -3.870335000 | 3.334164000  | 1  | 2.064438000  | -5.801031000 | 2.191691000  |
| 1  | -1.171864000 | -4.671201000 | 4.038583000  | 1  | 0.521951000  | -6.113083000 | 2.985678000  |
| 6  | -1.554820000 | 2.199517000  | 1.363136000  | 1  | 0.690069000  | -6.382496000 | 1.251485000  |
| 6  | -0.639284000 | 4.069599000  | 2.280705000  | 6  | 2.771121000  | -2.907453000 | 1.963604000  |
| 1  | -0.618282000 | 5.077034000  | 2.657856000  | 1  | 3.182968000  | -2.321579000 | 1.133238000  |
| 6  | 0.329404000  | 3.132677000  | 2.182500000  | 1  | 2.957491000  | -2.330012000 | 2.876287000  |
| 1  | 1.370999000  | 3.173930000  | 2.452786000  | 1  | 3.329034000  | -3.843114000 | 2.041885000  |
| 7  | 0.590784000  | -0.323334000 | 0.441685000  | 7  | -2.511025000 | 0.464785000  | 1.588427000  |
| 1  | -2.696380000 | 3.926799000  | 1.680976000  | 7  | -2.694444000 | 2.594810000  | 2.630695000  |
| 1  | 0.267647000  | 1.110925000  | 1.345656000  | 7  | -0.883712000 | 2.264294000  | 1.492352000  |
| 1  | 0.314243000  | -1.752606000 | 1.294799000  | 6  | -2.048087000 | 1.660819000  | 1.856076000  |
| 1  | -2.956500000 | -2.917234000 | 3.424007000  | 6  | -1.923241000 | 3.756749000  | 2.760836000  |
| 1  | -0.313134000 | -1.753623000 | -1.293888000 | 6  | -0.790651000 | 3.533056000  | 2.045741000  |
| 1  | 2.958161000  | -2.917414000 | -3.422709000 | 1  | -3.591246000 | 2.424492000  | 3.052598000  |
| 1  | 2.694254000  | 3.928348000  | -1.680568000 | 1  | -0.098870000 | 1.693376000  | 1.066569000  |
| 1  | -0.268805000 | 1.111437000  | -1.345031000 | 6  | 0.389320000  | 4.384046000  | 1.769211000  |
| 7  | 3.091827000  | -0.559657000 | 0.849886000  | 1  | 0.341312000  | 5.321318000  | 2.326172000  |
| 7  | 4.997630000  | 0.681266000  | -0.023441000 | 1  | 1.318638000  | 3.871433000  | 2.037596000  |
| 7  | 5.306528000  | -0.625676000 | 1.678592000  | 1  | 0.463660000  | 4.624937000  | 0.702208000  |
| 6  | 4.331977000  | -0.187762000 | 0.808037000  | 6  | -2.389446000 | 4.923766000  | 3.540012000  |
| 6  | 6.322295000  | 0.809537000  | 0.358163000  | 1  | -3.322464000 | 5.344632000  | 3.146131000  |
| 1  | 7.012771000  | 1.449125000  | -0.164053000 | 1  | -2.569241000 | 4.674812000  | 4.592645000  |
| 6  | 6.522004000  | -0.010925000 | 1.412386000  | 1  | -1.640830000 | 5.716889000  | 3.517346000  |
| 1  | 7.412288000  | -0.226537000 | 1.976389000  | 15 | 1.949924000  | 0.502190000  | -0.515279000 |
| 1  | 4.436576000  | 1.261154000  | -0.648104000 | 7  | 1.996150000  | 1.516603000  | -1.816961000 |
| 1  | 5.105680000  | -1.281868000 | 2.413142000  | 7  | -0.216708000 | 2.496402000  | -1.620994000 |
| 7  | -3.091778000 | -0.561919000 | -0.849996000 | 7  | 1.260025000  | 3.546282000  | -2.805310000 |
| 7  | -4.997690000 | 0.681008000  | 0.020156000  | 6  | 1.080151000  | 2.424313000  | -2.033471000 |
| 7  | -5.305994000 | -0.628669000 | -1.679853000 | 6  | -0.841170000 | 3.616411000  | -2.150374000 |
| 6  | -4.331828000 | -0.189617000 | -0.809454000 | 6  | 0.077690000  | 4.289967000  | -2.890542000 |
| 6  | -6.322167000 | 0.808809000  | -0.362207000 | 1  | -0.676496000 | 1.638557000  | -1.212161000 |
| 1  | -7.012817000 | 1.449272000  | 0.158705000  | 1  | 2.140805000  | 3.763345000  | -3.240202000 |
| 6  | -6.521503000 | -0.013314000 | -1.415212000 | 6  | -0.002794000 | 5.551244000  | -3.658387000 |
| 1  | -7.411568000 | -0.229709000 | -1.979260000 | 1  | -1.009794000 | 5.966738000  | -3.600072000 |
| 1  | -4.436793000 | 1.261145000  | 0.644746000  | 1  | 0.687893000  | 6.315052000  | -3.281384000 |
| 1  | -5.104909000 | -1.286124000 | -2.413207000 | 1  | 0.229581000  | 5.405245000  | -4.719859000 |
|    |              |              |              | 6  | -2.258609000 | 3.904521000  | -1.832699000 |
|    |              |              |              | 1  | -2.903990000 | 3.059647000  | -2.095987000 |



|                                                                         |   |              |              |              |
|-------------------------------------------------------------------------|---|--------------|--------------|--------------|
|                                                                         | 1 | -2.397902000 | 4.083755000  | -0.759945000 |
|                                                                         | 1 | -2.614766000 | 4.784279000  | -2.371453000 |
|                                                                         | 7 | 2.956205000  | 1.071914000  | 0.670214000  |
|                                                                         | 7 | 5.046552000  | 0.264772000  | -0.285855000 |
|                                                                         | 7 | 5.133446000  | 1.493132000  | 1.493002000  |
|                                                                         | 6 | 4.243632000  | 0.939264000  | 0.600561000  |
|                                                                         | 6 | 6.387830000  | 0.349805000  | 0.084029000  |
|                                                                         | 6 | 6.448144000  | 1.128212000  | 1.193115000  |
|                                                                         | 1 | 4.598074000  | -0.378284000 | -0.938429000 |
|                                                                         | 1 | 4.826362000  | 2.043385000  | 2.276876000  |
|                                                                         | 6 | 7.592622000  | 1.604265000  | 1.999293000  |
|                                                                         | 1 | 8.529329000  | 1.204990000  | 1.608645000  |
|                                                                         | 1 | 7.674805000  | 2.697289000  | 1.994460000  |
|                                                                         | 1 | 7.515614000  | 1.292784000  | 3.047251000  |
|                                                                         | 6 | 7.454281000  | -0.306971000 | -0.703273000 |
|                                                                         | 1 | 7.316584000  | -1.392941000 | -0.752711000 |
|                                                                         | 1 | 7.482164000  | 0.058791000  | -1.735349000 |
|                                                                         | 1 | 8.433306000  | -0.121297000 | -0.259477000 |
|                                                                         | 7 | 2.662462000  | -0.923668000 | -1.064207000 |
|                                                                         | 7 | 2.433123000  | -3.203663000 | -1.675545000 |
|                                                                         | 7 | 0.600608000  | -2.050070000 | -1.688975000 |
|                                                                         | 6 | 1.937690000  | -1.940448000 | -1.453498000 |
|                                                                         | 6 | 1.389437000  | -4.109773000 | -1.906500000 |
|                                                                         | 6 | 0.247731000  | -3.377317000 | -1.915886000 |
|                                                                         | 1 | 3.378616000  | -3.450213000 | -1.435194000 |
|                                                                         | 1 | -0.059199000 | -1.270666000 | -1.437673000 |
|                                                                         | 6 | -1.165748000 | -3.762277000 | -2.130632000 |
|                                                                         | 1 | -1.268554000 | -4.848192000 | -2.182751000 |
|                                                                         | 1 | -1.800367000 | -3.386933000 | -1.319746000 |
|                                                                         | 1 | -1.562687000 | -3.342398000 | -3.061482000 |
|                                                                         | 6 | 1.642468000  | -5.553805000 | -2.093161000 |
|                                                                         | 1 | 2.248602000  | -5.763925000 | -2.982583000 |
|                                                                         | 1 | 2.168965000  | -5.990393000 | -1.234894000 |
|                                                                         | 1 | 0.700480000  | -6.092971000 | -2.205728000 |
| <b>(Im<sup>c</sup>N)<sub>3</sub>P–NN–P(Im<sup>c</sup>N)<sub>3</sub></b> |   |              |              |              |
| 15                                                                      |   | -1.830907000 | -0.024297000 | -0.414979000 |
| 7                                                                       |   | -2.766726000 | 0.738161000  | -1.588306000 |
| 7                                                                       |   | -2.912762000 | 3.146541000  | -1.129122000 |
| 7                                                                       |   | -4.676675000 | 2.088872000  | -1.862452000 |
| 7                                                                       |   | -1.210347000 | -1.335038000 | -1.207102000 |
| 7                                                                       |   | 0.567825000  | -2.726217000 | -1.870966000 |
| 7                                                                       |   | 0.518767000  | -0.778597000 | -2.863281000 |
| 6                                                                       |   | -3.357874000 | 1.888549000  | -1.490910000 |
| 6                                                                       |   | -3.933851000 | 4.070371000  | -1.271394000 |
| 1                                                                       |   | -3.783945000 | 5.112364000  | -1.044074000 |
| 6                                                                       |   | -5.026252000 | 3.419952000  | -1.730461000 |
| 1                                                                       |   | -6.010225000 | 3.780916000  | -1.977731000 |
| 6                                                                       |   | -0.134250000 | -1.524229000 | -1.896576000 |
| 6                                                                       |   | 1.625336000  | -2.691072000 | -2.761736000 |
| 1                                                                       |   | 2.300339000  | -3.522314000 | -2.877981000 |
| 6                                                                       |   | 1.602980000  | -1.479138000 | -3.358167000 |
| 1                                                                       |   | 2.261223000  | -1.047278000 | -4.093493000 |
| 7                                                                       |   | 0.376880000  | 1.131424000  | -0.345449000 |
| 15                                                                      |   | 1.736459000  | 0.712083000  | 0.399755000  |
| <b>(Im<sup>d</sup>N)<sub>3</sub>P–NN–P(Im<sup>d</sup>N)<sub>3</sub></b> |   |              |              |              |
| 15                                                                      |   | 1.421068000  | 1.070767000  | -0.721992000 |
| 7                                                                       |   | 2.201624000  | 0.673392000  | -2.159110000 |
| 7                                                                       |   | 3.401289000  | -1.422892000 | -1.854943000 |
| 7                                                                       |   | 4.543988000  | 0.332069000  | -2.455902000 |
| 7                                                                       |   | 0.383986000  | 2.271342000  | -1.141541000 |
| 7                                                                       |   | -1.718909000 | 3.319049000  | -1.062982000 |
| 7                                                                       |   | -1.639169000 | 1.532437000  | -2.312428000 |
| 6                                                                       |   | 3.258073000  | -0.080822000 | -2.144108000 |
| 6                                                                       |   | 4.739176000  | -1.804477000 | -1.929689000 |
| 6                                                                       |   | 5.452544000  | -0.709169000 | -2.305293000 |
| 6                                                                       |   | -0.861704000 | 2.303508000  | -1.473312000 |
| 6                                                                       |   | -2.989194000 | 3.147937000  | -1.608612000 |
| 6                                                                       |   | -2.944676000 | 2.019828000  | -2.360446000 |
| 7                                                                       |   | -0.230104000 | -0.819133000 | -0.568800000 |
| 15                                                                      |   | -1.576058000 | -1.032472000 | 0.273133000  |
| 7                                                                       |   | -1.270876000 | -1.577919000 | 1.837383000  |
| 7                                                                       |   | 0.447766000  | -3.272360000 | 1.457931000  |
| 7                                                                       |   | 0.605935000  | -2.013856000 | 3.228835000  |
| 7                                                                       |   | -2.728495000 | 0.152476000  | 0.509311000  |

|   |              |              |              |   |              |              |              |
|---|--------------|--------------|--------------|---|--------------|--------------|--------------|
| 7 | 1.684346000  | 1.161533000  | 2.013634000  | 7 | -4.160693000 | 1.808747000  | 1.334529000  |
| 7 | 1.002497000  | 3.500013000  | 1.960544000  | 7 | -2.108244000 | 1.944134000  | 2.080846000  |
| 7 | -0.026047000 | 2.167816000  | 3.344528000  | 6 | -0.171101000 | -2.224603000 | 2.106638000  |
| 7 | 2.349216000  | -0.837799000 | 0.442189000  | 6 | 1.608945000  | -3.652608000 | 2.134648000  |
| 7 | 3.100742000  | -3.024382000 | 0.796746000  | 6 | 1.706614000  | -2.865755000 | 3.236271000  |
| 7 | 1.204426000  | -2.552892000 | 1.790725000  | 6 | -2.915421000 | 1.183738000  | 1.250123000  |
| 6 | 0.950900000  | 2.182526000  | 2.371559000  | 6 | -4.104518000 | 2.926358000  | 2.165705000  |
| 6 | 0.049429000  | 4.249747000  | 2.626233000  | 6 | -2.832165000 | 3.011275000  | 2.625145000  |
| 1 | -0.063772000 | 5.306822000  | 2.452328000  | 7 | 0.829842000  | -0.136990000 | 0.173796000  |
| 6 | -0.592581000 | 3.419295000  | 3.478268000  | 7 | 2.561521000  | 1.869523000  | 0.191604000  |
| 1 | -1.387101000 | 3.610117000  | 4.179833000  | 7 | 4.833942000  | 2.453141000  | 0.401578000  |
| 6 | 2.178755000  | -1.984645000 | 0.978124000  | 7 | 4.393486000  | 0.342805000  | 0.780383000  |
| 6 | 2.712719000  | -4.150539000 | 1.499418000  | 6 | 3.783033000  | 1.541793000  | 0.430687000  |
| 1 | 3.302734000  | -5.051837000 | 1.505143000  | 6 | 6.045658000  | 1.828791000  | 0.690789000  |
| 6 | 1.542728000  | -3.860299000 | 2.107249000  | 6 | 5.772026000  | 0.521115000  | 0.926856000  |
| 1 | 0.910032000  | -4.465201000 | 2.735086000  | 7 | -2.420003000 | -2.089936000 | -0.693746000 |
| 7 | -0.788372000 | 0.806174000  | 0.480859000  | 7 | -4.728095000 | -2.150358000 | 0.134356000  |
| 7 | -2.904730000 | -0.588430000 | 0.717397000  | 7 | -4.342807000 | -2.523786000 | -1.981657000 |
| 7 | -4.152355000 | -2.498630000 | -0.248291000 | 6 | -3.700203000 | -2.216561000 | -0.790307000 |
| 7 | -4.246833000 | -2.080460000 | 1.901532000  | 6 | -5.962495000 | -2.379799000 | -0.484131000 |
| 6 | -3.675193000 | -1.616684000 | 0.719074000  | 6 | -5.720953000 | -2.611390000 | -1.798467000 |
| 6 | -4.955657000 | -3.464699000 | 0.346561000  | 6 | 3.684442000  | -0.818921000 | 1.276277000  |
| 1 | -5.420556000 | -4.241760000 | -0.236433000 | 1 | 2.619606000  | -0.739014000 | 1.004937000  |
| 6 | -5.013264000 | -3.206747000 | 1.669919000  | 1 | 4.098306000  | -1.733056000 | 0.837364000  |
| 1 | -5.532635000 | -3.717061000 | 2.463472000  | 1 | 3.787053000  | -0.887672000 | 2.366996000  |
| 7 | 2.891482000  | 1.444261000  | -0.549217000 | 6 | 4.642894000  | 3.832917000  | 0.043604000  |
| 7 | 5.074316000  | 0.630665000  | 0.232253000  | 1 | 5.309914000  | 4.128135000  | -0.772394000 |
| 7 | 4.831545000  | 1.209125000  | -1.863126000 | 1 | 3.605100000  | 3.931272000  | -0.280378000 |
| 6 | 4.128101000  | 1.102097000  | -0.668091000 | 1 | 4.816133000  | 4.500649000  | 0.894591000  |
| 6 | 6.298562000  | 0.469488000  | -0.398395000 | 6 | -1.280837000 | 4.437606000  | -0.274856000 |
| 1 | 7.164500000  | 0.115044000  | 0.135459000  | 1 | -0.246932000 | 4.238350000  | 0.013043000  |
| 6 | 6.150563000  | 0.833223000  | -1.690670000 | 1 | -1.311140000 | 5.371705000  | -0.848461000 |
| 1 | 6.861658000  | 0.857044000  | -2.499164000 | 1 | -1.900069000 | 4.555448000  | 0.620444000  |
| 6 | -3.962764000 | -1.458275000 | 3.166993000  | 6 | -0.115779000 | -3.942320000 | 0.305978000  |
| 1 | -4.148744000 | -0.383388000 | 3.108167000  | 1 | 0.380006000  | -4.905439000 | 0.174685000  |
| 1 | -4.600846000 | -1.899314000 | 3.933112000  | 1 | -1.183888000 | -4.104138000 | 0.467905000  |
| 1 | -2.912741000 | -1.593574000 | 3.447616000  | 1 | -0.019440000 | -3.326053000 | -0.591815000 |
| 6 | -3.970075000 | -2.398582000 | -1.681395000 | 6 | 0.419071000  | -0.879553000 | 4.092149000  |
| 1 | -4.922339000 | -2.621475000 | -2.173216000 | 1 | -0.587687000 | -0.501107000 | 3.913183000  |
| 1 | -3.655100000 | -1.388369000 | -1.941631000 | 1 | 0.523030000  | -1.168061000 | 5.141389000  |
| 1 | -3.205615000 | -3.094645000 | -2.036907000 | 1 | 1.138599000  | -0.084250000 | 3.862829000  |
| 6 | 0.145888000  | -3.864243000 | -1.100598000 | 6 | -4.547260000 | -2.042309000 | 1.563849000  |
| 1 | -0.630455000 | -3.523194000 | -0.413233000 | 1 | -5.117806000 | -2.828384000 | 2.068771000  |
| 1 | -0.275440000 | -4.648051000 | -1.741449000 | 1 | -3.489819000 | -2.153221000 | 1.807471000  |
| 1 | 0.979186000  | -4.281949000 | -0.529752000 | 1 | -4.874118000 | -1.068238000 | 1.940682000  |
| 6 | 1.877397000  | 3.986189000  | 0.919963000  | 6 | -3.637152000 | -2.668213000 | -3.227683000 |
| 1 | 1.920922000  | 5.075093000  | 0.976646000  | 1 | -2.573499000 | -2.588281000 | -3.000116000 |
| 1 | 2.877828000  | 3.572212000  | 1.061107000  | 1 | -3.837808000 | -3.641349000 | -3.685994000 |
| 1 | 1.528641000  | 3.661938000  | -0.065146000 | 1 | -3.908981000 | -1.881948000 | -3.940664000 |
| 6 | -0.622932000 | 0.933759000  | 3.792582000  | 6 | 2.297181000  | -2.301270000 | -1.543950000 |
| 1 | 0.169064000  | 0.227199000  | 4.042069000  | 1 | 2.339748000  | -3.194889000 | -2.176909000 |
| 1 | -1.231311000 | 1.129252000  | 4.677557000  | 1 | 2.318128000  | -2.598560000 | -0.490962000 |
| 1 | -1.232300000 | 0.518413000  | 2.979265000  | 1 | 1.351670000  | -1.770306000 | -1.694781000 |
| 6 | 4.866573000  | 0.445412000  | 1.650966000  | 6 | 4.855490000  | 1.694095000  | -2.801488000 |
| 1 | 5.707902000  | 0.879573000  | 2.198814000  | 1 | 5.674811000  | 2.071786000  | -2.183259000 |

|   |              |              |              |   |              |              |              |
|---|--------------|--------------|--------------|---|--------------|--------------|--------------|
| 1 | 3.941319000  | 0.936825000  | 1.955956000  | 1 | 5.136437000  | 1.787803000  | -3.856061000 |
| 1 | 4.778070000  | -0.614211000 | 1.907082000  | 1 | 3.953036000  | 2.281357000  | -2.617975000 |
| 6 | 4.216097000  | 1.651910000  | -3.086243000 | 6 | -0.669928000 | 1.834362000  | 2.184197000  |
| 1 | 3.136002000  | 1.599610000  | -2.943079000 | 1 | -0.369006000 | 1.819901000  | 3.235304000  |
| 1 | 4.487761000  | 2.685188000  | -3.326804000 | 1 | -0.307302000 | 0.927479000  | 1.691758000  |
| 1 | 4.513515000  | 1.006356000  | -3.916187000 | 1 | -0.175714000 | 2.677075000  | 1.688464000  |
| 6 | -1.555582000 | 3.478449000  | -0.742119000 | 6 | -1.154243000 | 0.428672000  | -3.108665000 |
| 1 | -1.310594000 | 4.463833000  | -1.149956000 | 1 | -1.464455000 | 0.571836000  | -4.150458000 |
| 1 | -1.443035000 | 3.481385000  | 0.344820000  | 1 | -0.065345000 | 0.408653000  | -3.053017000 |
| 1 | -0.854883000 | 2.730154000  | -1.121256000 | 1 | -1.518264000 | -0.525559000 | -2.720108000 |
| 6 | -5.530759000 | 0.995421000  | -2.247695000 | 6 | -5.305482000 | 1.368003000  | 0.585442000  |
| 1 | -5.613881000 | 0.267314000  | -1.435280000 | 1 | -4.998598000 | 0.487205000  | 0.017529000  |
| 1 | -6.520776000 | 1.383951000  | -2.486137000 | 1 | -6.140148000 | 1.103104000  | 1.245006000  |
| 1 | -5.124569000 | 0.478471000  | -3.121090000 | 1 | -5.650062000 | 2.137613000  | -0.113998000 |
| 6 | -0.058980000 | -1.947998000 | 2.138001000  | 6 | 2.482268000  | -4.749903000 | 1.660470000  |
| 1 | -0.157250000 | -1.873628000 | 3.225223000  | 1 | 3.388576000  | -4.799861000 | 2.267092000  |
| 1 | -0.140276000 | -0.949075000 | 1.695853000  | 1 | 1.998425000  | -5.732669000 | 1.717582000  |
| 1 | -0.886875000 | -2.550842000 | 1.747284000  | 1 | 2.789689000  | -4.608356000 | 0.617814000  |
| 6 | 0.146861000  | 0.553688000  | -3.281907000 | 6 | 2.713115000  | -2.832295000 | 4.320535000  |
| 1 | 0.306866000  | 0.640800000  | -4.360798000 | 1 | 2.295710000  | -3.144088000 | 5.285577000  |
| 1 | -0.909786000 | 0.709291000  | -3.056931000 | 1 | 3.543319000  | -3.502932000 | 4.092478000  |
| 1 | 0.716745000  | 1.303380000  | -2.727241000 | 1 | 3.130554000  | -1.829266000 | 4.466489000  |
| 6 | 4.286857000  | -2.881315000 | -0.005026000 | 6 | -7.230891000 | -2.340203000 | 0.276780000  |
| 1 | 4.154991000  | -1.999920000 | -0.635335000 | 1 | -8.081801000 | -2.478871000 | -0.391606000 |
| 1 | 5.185129000  | -2.742946000 | 0.608339000  | 1 | -7.286053000 | -3.123345000 | 1.041801000  |
| 1 | 4.428599000  | -3.763972000 | -0.634364000 | 1 | -7.368116000 | -1.383771000 | 0.794241000  |
|   |              |              |              | 6 | -6.638916000 | -2.883468000 | -2.926358000 |
|   |              |              |              | 1 | -6.555838000 | -2.126775000 | -3.715608000 |
|   |              |              |              | 1 | -6.442534000 | -3.853973000 | -3.396039000 |
|   |              |              |              | 1 | -7.674847000 | -2.889530000 | -2.585148000 |
|   |              |              |              | 6 | -5.305711000 | 3.739436000  | 2.460420000  |
|   |              |              |              | 1 | -5.771908000 | 4.137608000  | 1.551145000  |
|   |              |              |              | 1 | -6.079041000 | 3.162941000  | 2.982867000  |
|   |              |              |              | 1 | -5.047751000 | 4.588822000  | 3.094547000  |
|   |              |              |              | 6 | -2.200932000 | 3.976002000  | 3.552841000  |
|   |              |              |              | 1 | -1.843582000 | 3.494317000  | 4.470536000  |
|   |              |              |              | 1 | -1.334060000 | 4.473511000  | 3.102413000  |
|   |              |              |              | 1 | -2.913261000 | 4.749945000  | 3.843217000  |
|   |              |              |              | 6 | -4.086722000 | 4.095315000  | -1.317571000 |
|   |              |              |              | 1 | -5.011871000 | 3.773509000  | -1.799511000 |
|   |              |              |              | 1 | -4.276849000 | 4.183791000  | -0.240326000 |
|   |              |              |              | 1 | -3.866788000 | 5.106469000  | -1.681636000 |
|   |              |              |              | 6 | -4.024081000 | 1.268939000  | -3.038368000 |
|   |              |              |              | 1 | -3.817570000 | 1.092265000  | -4.100225000 |
|   |              |              |              | 1 | -4.167840000 | 0.287409000  | -2.566647000 |
|   |              |              |              | 1 | -4.969462000 | 1.811239000  | -2.971794000 |
|   |              |              |              | 6 | 5.173872000  | -3.185699000 | -1.622102000 |
|   |              |              |              | 1 | 4.708710000  | -3.925369000 | -2.283569000 |
|   |              |              |              | 1 | 6.255430000  | -3.282534000 | -1.731869000 |
|   |              |              |              | 1 | 4.917948000  | -3.477043000 | -0.595446000 |
|   |              |              |              | 6 | 6.907114000  | -0.506158000 | -2.484052000 |
|   |              |              |              | 1 | 7.302012000  | 0.219873000  | -1.759988000 |
|   |              |              |              | 1 | 7.448771000  | -1.442329000 | -2.338972000 |
|   |              |              |              | 1 | 7.156713000  | -0.131596000 | -3.482874000 |
|   |              |              |              | 6 | 7.330428000  | 2.561974000  | 0.645681000  |

|                                                                               |              |              |              |              |
|-------------------------------------------------------------------------------|--------------|--------------|--------------|--------------|
|                                                                               | 1            | 8.158610000  | 1.901119000  | 0.906078000  |
|                                                                               | 1            | 7.539636000  | 2.972913000  | -0.350481000 |
|                                                                               | 1            | 7.350108000  | 3.406136000  | 1.343915000  |
|                                                                               | 6            | 6.665620000  | -0.619311000 | 1.226054000  |
|                                                                               | 1            | 6.425097000  | -1.101163000 | 2.180571000  |
|                                                                               | 1            | 6.592035000  | -1.393690000 | 0.450929000  |
|                                                                               | 1            | 7.706089000  | -0.293324000 | 1.274136000  |
| $(\text{Im}^a\text{CH})_3\text{P}-\text{NN}-\text{P}(\text{Im}^a\text{CH})_3$ |              |              |              |              |
| 15                                                                            | 1.960093000  | -0.098729000 | -0.303789000 |              |
| 6                                                                             | 2.160302000  | -0.889946000 | -1.867397000 |              |
| 7                                                                             | 0.473746000  | -2.690052000 | -1.682274000 |              |
| 7                                                                             | 1.955292000  | -2.917128000 | -3.266706000 |              |
| 6                                                                             | 2.180779000  | 1.636491000  | -0.659843000 |              |
| 7                                                                             | 1.069084000  | 3.649416000  | -1.594132000 |              |
| 7                                                                             | 0.078240000  | 1.750675000  | -1.957892000 |              |
| 6                                                                             | 1.577389000  | -2.089227000 | -2.230142000 |              |
| 6                                                                             | 0.143215000  | -3.816582000 | -2.414099000 |              |
| 1                                                                             | -0.708080000 | -4.425014000 | -2.158371000 |              |
| 6                                                                             | 1.061500000  | -3.978047000 | -3.391039000 |              |
| 1                                                                             | 1.182049000  | -4.744628000 | -4.136621000 |              |
| 6                                                                             | 1.182845000  | 2.298585000  | -1.363811000 |              |
| 6                                                                             | -0.119180000 | 3.933262000  | -2.264306000 |              |
| 1                                                                             | -0.393780000 | 4.934727000  | -2.546702000 |              |
| 6                                                                             | -0.727081000 | 2.745352000  | -2.475965000 |              |
| 1                                                                             | -1.663810000 | 2.517017000  | -2.955537000 |              |
| 7                                                                             | -0.581958000 | -0.573537000 | -0.462059000 |              |
| 15                                                                            | -1.960119000 | -0.099227000 | 0.303670000  |              |
| 6                                                                             | -2.160165000 | -0.890477000 | 1.867324000  |              |
| 7                                                                             | -0.473052000 | -2.690045000 | 1.682171000  |              |
| 7                                                                             | -1.954419000 | -2.917533000 | 3.266724000  |              |
| 6                                                                             | -2.181202000 | 1.635964000  | 0.659797000  |              |
| 7                                                                             | -1.069970000 | 3.649013000  | 1.594309000  |              |
| 7                                                                             | -0.078774000 | 1.750430000  | 1.958049000  |              |
| 6                                                                             | -1.576873000 | -2.089567000 | 2.230101000  |              |
| 6                                                                             | -0.142112000 | -3.816444000 | 2.414013000  |              |
| 1                                                                             | 0.709393000  | -4.424581000 | 2.158275000  |              |
| 6                                                                             | -1.060280000 | -3.978194000 | 3.391011000  |              |
| 1                                                                             | -1.180563000 | -4.744766000 | 4.136643000  |              |
| 6                                                                             | -1.183452000 | 2.298167000  | 1.363920000  |              |
| 6                                                                             | 0.118238000  | 3.933062000  | 2.264505000  |              |
| 1                                                                             | 0.392570000  | 4.934559000  | 2.547052000  |              |
| 6                                                                             | 0.726360000  | 2.745263000  | 2.476134000  |              |
| 1                                                                             | 1.663055000  | 2.517107000  | 2.955857000  |              |
| 7                                                                             | 0.581989000  | -0.573396000 | 0.461930000  |              |
| 1                                                                             | -1.739079000 | 4.321808000  | 1.263849000  |              |
| 1                                                                             | 0.251493000  | 0.801485000  | 1.660795000  |              |
| 1                                                                             | 0.199418000  | -2.059777000 | 1.161383000  |              |
| 1                                                                             | -2.762374000 | -2.754415000 | 3.840810000  |              |
| 1                                                                             | -0.198896000 | -2.060062000 | -1.161426000 |              |
| 1                                                                             | 2.763158000  | -2.753667000 | -3.840819000 |              |
| 1                                                                             | 1.738224000  | 4.322306000  | -1.263932000 |              |
| 1                                                                             | -0.251795000 | 0.801611000  | -1.660811000 |              |
| 6                                                                             | 3.197368000  | -0.446271000 | 0.914607000  |              |
| 7                                                                             | 5.051693000  | 0.726574000  | -0.219815000 |              |
| $(\text{Im}^b\text{CH})_3\text{P}-\text{NN}-\text{P}(\text{Im}^b\text{CH})_3$ |              |              |              |              |
| 7                                                                             | -0.085733000 | -0.886423000 | -1.111498000 |              |
| 7                                                                             | 0.817535000  | -0.091424000 | -1.930324000 |              |
| 15                                                                            | -1.498637000 | -0.166858000 | -0.813235000 |              |
| 6                                                                             | -2.125183000 | -1.218654000 | 0.480238000  |              |
| 7                                                                             | -4.004876000 | 0.132007000  | 1.370136000  |              |
| 7                                                                             | -3.360062000 | -1.565140000 | 2.588458000  |              |
| 6                                                                             | -3.083838000 | -0.894961000 | 1.398040000  |              |
| 6                                                                             | -4.697940000 | 0.206057000  | 2.581433000  |              |
| 6                                                                             | -4.292833000 | -0.831076000 | 3.347282000  |              |
| 1                                                                             | -3.944498000 | 0.909744000  | 0.720423000  |              |
| 1                                                                             | -2.617396000 | -2.091913000 | 3.026504000  |              |
| 6                                                                             | -4.722327000 | -1.292876000 | 4.683884000  |              |
| 1                                                                             | -5.439466000 | -0.596790000 | 5.121144000  |              |
| 1                                                                             | -5.197501000 | -2.280167000 | 4.646256000  |              |
| 1                                                                             | -3.878675000 | -1.372495000 | 5.380710000  |              |
| 6                                                                             | -5.716083000 | 1.256394000  | 2.799941000  |              |
| 1                                                                             | -5.292058000 | 2.258019000  | 2.661713000  |              |
| 1                                                                             | -6.552844000 | 1.165966000  | 2.097305000  |              |
| 1                                                                             | -6.123110000 | 1.203983000  | 3.810548000  |              |
| 1                                                                             | -1.416933000 | -1.998779000 | 0.743245000  |              |
| 6                                                                             | -1.310170000 | 1.551736000  | -0.335925000 |              |
| 7                                                                             | -3.617436000 | 2.388418000  | -0.635285000 |              |
| 7                                                                             | -2.108118000 | 3.872318000  | -0.009859000 |              |
| 6                                                                             | -2.257055000 | 2.524740000  | -0.335524000 |              |
| 6                                                                             | -4.199505000 | 3.670104000  | -0.739473000 |              |
| 6                                                                             | -3.277714000 | 4.576731000  | -0.356009000 |              |
| 1                                                                             | -3.817055000 | 1.625180000  | -1.296699000 |              |
| 1                                                                             | -1.195262000 | 4.296555000  | -0.078901000 |              |
| 6                                                                             | -3.364112000 | 6.040874000  | -0.166953000 |              |
| 1                                                                             | -4.341872000 | 6.414355000  | -0.473574000 |              |
| 1                                                                             | -3.209199000 | 6.328435000  | 0.879269000  |              |
| 1                                                                             | -2.610574000 | 6.573395000  | -0.758791000 |              |
| 6                                                                             | -5.627216000 | 3.818817000  | -1.095045000 |              |
| 1                                                                             | -5.846710000 | 3.394315000  | -2.081161000 |              |
| 1                                                                             | -6.280459000 | 3.306634000  | -0.378387000 |              |
| 1                                                                             | -5.916958000 | 4.870274000  | -1.118306000 |              |
| 1                                                                             | -0.278212000 | 1.842182000  | -0.158521000 |              |
| 6                                                                             | -2.773441000 | -0.041813000 | -2.082543000 |              |
| 7                                                                             | -3.913714000 | -2.206876000 | -1.720858000 |              |
| 7                                                                             | -4.202886000 | -1.309619000 | -3.668780000 |              |
| 6                                                                             | -3.559304000 | -1.112515000 | -2.464206000 |              |
| 6                                                                             | -4.678641000 | -3.101603000 | -2.466866000 |              |
| 6                                                                             | -4.855698000 | -2.550763000 | -3.690924000 |              |
| 1                                                                             | -3.492401000 | -2.344213000 | -0.803918000 |              |
| 1                                                                             | -3.959469000 | -0.781921000 | -4.490385000 |              |
| 6                                                                             | -5.602495000 | -3.012269000 | -4.880096000 |              |

|   |              |              |              |    |              |              |              |
|---|--------------|--------------|--------------|----|--------------|--------------|--------------|
| 7 | 5.588770000  | -0.396922000 | 1.563994000  | 1  | -6.039081000 | -3.995536000 | -4.700404000 |
| 6 | 4.503611000  | -0.072326000 | 0.766796000  | 1  | -6.419920000 | -2.331482000 | -5.144800000 |
| 6 | 6.394165000  | 0.972302000  | 0.037007000  | 1  | -4.958140000 | -3.098521000 | -5.762875000 |
| 1 | 6.996808000  | 1.583240000  | -0.612136000 | 6  | -5.172502000 | -4.368350000 | -1.885424000 |
| 6 | 6.732057000  | 0.276667000  | 1.139987000  | 1  | -4.348431000 | -5.008082000 | -1.551517000 |
| 1 | 7.680905000  | 0.159858000  | 1.633487000  | 1  | -5.816907000 | -4.195627000 | -1.016392000 |
| 1 | 4.443272000  | 1.238062000  | -0.853342000 | 1  | -5.750002000 | -4.931551000 | -2.619579000 |
| 1 | 5.492742000  | -0.892207000 | 2.432450000  | 1  | -2.510942000 | 0.644874000  | -2.888100000 |
| 6 | -3.197466000 | -0.447037000 | -0.914571000 | 15 | 2.187711000  | -0.078403000 | -1.063945000 |
| 7 | -5.051746000 | 0.726068000  | 0.219724000  | 6  | 2.703659000  | -1.765697000 | -0.723871000 |
| 7 | -5.588913000 | -0.397920000 | -1.563783000 | 7  | 4.975810000  | -1.378737000 | 0.167376000  |
| 6 | -4.503704000 | -0.073032000 | -0.766731000 | 7  | 4.469779000  | -3.447992000 | -0.281463000 |
| 6 | -6.394167000 | 0.971882000  | -0.037204000 | 6  | 3.946560000  | -2.158387000 | -0.317566000 |
| 1 | -6.996791000 | 1.582984000  | 0.611806000  | 6  | 6.142694000  | -2.129436000 | 0.324760000  |
| 6 | -6.732107000 | 0.276034000  | -1.140035000 | 6  | 5.839733000  | -3.414281000 | 0.035444000  |
| 1 | -7.680948000 | 0.159238000  | -1.633550000 | 1  | 4.969107000  | -0.367115000 | 0.116168000  |
| 1 | -4.443267000 | 1.237563000  | 0.853201000  | 1  | 4.057648000  | -4.175962000 | -0.842309000 |
| 1 | -5.492654000 | -0.892353000 | -2.432708000 | 6  | 6.647428000  | -4.650780000 | 0.093435000  |
| 1 | -2.698564000 | 2.232680000  | -0.088955000 | 1  | 7.681735000  | -4.422166000 | 0.354403000  |
| 1 | -2.936861000 | -1.150344000 | -1.696675000 | 1  | 6.266144000  | -5.358068000 | 0.839559000  |
| 1 | -2.962674000 | -0.521292000 | 2.499805000  | 1  | 6.662543000  | -5.178727000 | -0.867659000 |
| 1 | 2.698137000  | 2.233209000  | 0.088906000  | 6  | 7.389954000  | -1.488228000 | 0.793703000  |
| 1 | 2.936508000  | -1.149227000 | 1.696940000  | 1  | 7.675204000  | -0.650541000 | 0.145967000  |
| 1 | 2.962681000  | -0.520554000 | -2.499923000 | 1  | 7.285599000  | -1.084712000 | 1.808020000  |
|   |              |              |              | 1  | 8.217424000  | -2.198969000 | 0.802181000  |
|   |              |              |              | 1  | 2.033342000  | -2.511816000 | -1.139853000 |
|   |              |              |              | 6  | 3.388621000  | 0.820422000  | -2.004586000 |
|   |              |              |              | 7  | 4.823412000  | 1.671654000  | -0.169252000 |
|   |              |              |              | 7  | 5.411561000  | 2.221990000  | -2.214240000 |
|   |              |              |              | 6  | 4.442979000  | 1.517704000  | -1.504942000 |
|   |              |              |              | 6  | 5.839082000  | 2.642578000  | -0.075712000 |
|   |              |              |              | 6  | 6.201602000  | 2.980076000  | -1.330982000 |
|   |              |              |              | 1  | 4.077594000  | 1.542221000  | 0.523751000  |
|   |              |              |              | 1  | 5.232921000  | 2.508758000  | -3.163610000 |
|   |              |              |              | 6  | 7.277298000  | 3.859156000  | -1.837178000 |
|   |              |              |              | 1  | 7.791737000  | 4.354605000  | -1.012867000 |
|   |              |              |              | 1  | 8.026282000  | 3.300949000  | -2.410786000 |
|   |              |              |              | 1  | 6.888694000  | 4.642646000  | -2.498380000 |
|   |              |              |              | 6  | 6.394813000  | 3.027672000  | 1.239386000  |
|   |              |              |              | 1  | 5.626461000  | 3.444998000  | 1.899809000  |
|   |              |              |              | 1  | 6.829877000  | 2.168808000  | 1.764480000  |
|   |              |              |              | 1  | 7.176420000  | 3.780388000  | 1.127092000  |
|   |              |              |              | 1  | 3.256947000  | 0.784624000  | -3.080197000 |
|   |              |              |              | 6  | 2.110170000  | 0.753675000  | 0.532590000  |
|   |              |              |              | 7  | 1.423720000  | -1.168862000 | 1.943206000  |
|   |              |              |              | 7  | 0.580092000  | 0.771563000  | 2.490951000  |
|   |              |              |              | 6  | 1.407450000  | 0.152282000  | 1.566570000  |
|   |              |              |              | 6  | 0.478785000  | -1.397566000 | 2.944628000  |
|   |              |              |              | 6  | -0.047799000 | -0.200852000 | 3.289248000  |
|   |              |              |              | 1  | 1.749499000  | -1.847423000 | 1.255020000  |
|   |              |              |              | 1  | 0.075659000  | 1.597489000  | 2.198560000  |
|   |              |              |              | 6  | -1.035710000 | 0.187250000  | 4.317765000  |
|   |              |              |              | 1  | -1.355099000 | -0.682381000 | 4.896450000  |
|   |              |              |              | 1  | -0.625517000 | 0.918663000  | 5.023933000  |
|   |              |              |              | 1  | -1.936352000 | 0.633419000  | 3.874058000  |

|                                                                               |              |              |              |                                                                               |              |              |              |
|-------------------------------------------------------------------------------|--------------|--------------|--------------|-------------------------------------------------------------------------------|--------------|--------------|--------------|
|                                                                               |              |              |              | 6                                                                             | 0.249194000  | -2.754426000 | 3.487969000  |
|                                                                               |              |              |              | 1                                                                             | -0.138339000 | -3.437479000 | 2.721578000  |
|                                                                               |              |              |              | 1                                                                             | 1.170432000  | -3.204769000 | 3.874168000  |
|                                                                               |              |              |              | 1                                                                             | -0.470469000 | -2.728337000 | 4.309877000  |
|                                                                               |              |              |              | 1                                                                             | 1.866139000  | 1.812417000  | 0.408555000  |
| $(\text{Im}^c\text{CH})_3\text{P}-\text{NN}-\text{P}(\text{Im}^c\text{CH})_3$ |              |              |              | $(\text{Im}^d\text{CH})_3\text{P}-\text{NN}-\text{P}(\text{Im}^d\text{CH})_3$ |              |              |              |
| 15                                                                            | -1.859535000 | 0.198186000  | -0.586928000 | 15                                                                            | -1.497237000 | -0.838333000 | -0.170360000 |
| 6                                                                             | -1.852823000 | 0.879888000  | -2.230188000 | 6                                                                             | -2.369278000 | -0.933409000 | -1.747654000 |
| 7                                                                             | -1.237199000 | 3.271808000  | -1.813679000 | 7                                                                             | -3.776037000 | 1.102468000  | -1.570961000 |
| 7                                                                             | -0.770699000 | 2.448169000  | -3.785234000 | 7                                                                             | -4.660785000 | -0.607278000 | -2.616971000 |
| 6                                                                             | -1.978422000 | -1.584641000 | -0.828913000 | 6                                                                             | -0.619816000 | -2.408518000 | -0.050145000 |
| 7                                                                             | -1.286150000 | -3.914420000 | -1.022109000 | 7                                                                             | 1.490409000  | -3.644552000 | 0.144987000  |
| 7                                                                             | 0.075979000  | -2.502338000 | -1.995820000 | 7                                                                             | 1.335700000  | -2.376185000 | -1.628209000 |
| 6                                                                             | -1.320425000 | 2.111691000  | -2.557704000 | 6                                                                             | -3.505670000 | -0.188340000 | -1.981847000 |
| 6                                                                             | -0.623154000 | 4.267453000  | -2.556685000 | 6                                                                             | -5.094565000 | 1.441605000  | -1.897145000 |
| 1                                                                             | -0.448180000 | 5.245786000  | -2.142107000 | 6                                                                             | -5.647265000 | 0.381391000  | -2.535260000 |
| 6                                                                             | -0.340190000 | 3.766305000  | -3.776082000 | 6                                                                             | 0.643844000  | -2.750843000 | -0.497214000 |
| 1                                                                             | 0.131385000  | 4.213917000  | -4.634176000 | 6                                                                             | 2.680605000  | -3.793742000 | -0.572447000 |
| 6                                                                             | -1.096560000 | -2.553542000 | -1.260160000 | 6                                                                             | 2.586004000  | -2.991403000 | -1.661343000 |
| 6                                                                             | -0.295634000 | -4.658700000 | -1.641137000 | 7                                                                             | 0.297450000  | 0.908930000  | -0.739175000 |
| 1                                                                             | -0.269252000 | -5.733133000 | -1.572141000 | 15                                                                            | 1.780624000  | 1.164441000  | -0.103428000 |
| 6                                                                             | 0.537966000  | -3.788334000 | -2.243377000 | 6                                                                             | 1.719319000  | 2.202858000  | 1.351873000  |
| 1                                                                             | 1.435170000  | -3.954519000 | -2.815122000 | 7                                                                             | -0.212125000 | 3.696884000  | 0.864824000  |
| 7                                                                             | 0.570735000  | 0.968032000  | -0.288478000 | 7                                                                             | 0.204978000  | 3.283479000  | 2.971852000  |
| 15                                                                            | 1.812060000  | 0.388391000  | 0.605997000  | 6                                                                             | 2.901927000  | -0.133607000 | 0.418324000  |
| 6                                                                             | 1.736373000  | 0.973111000  | 2.286879000  | 7                                                                             | 4.083250000  | -1.779603000 | 1.760859000  |
| 7                                                                             | 0.818294000  | 3.286762000  | 2.011618000  | 7                                                                             | 2.193870000  | -1.094841000 | 2.646678000  |
| 7                                                                             | 0.489434000  | 2.303923000  | 3.937371000  | 6                                                                             | 0.636503000  | 2.993598000  | 1.688703000  |
| 6                                                                             | 2.176967000  | -1.366873000 | 0.757539000  | 6                                                                             | -1.161944000 | 4.384923000  | 1.624260000  |
| 7                                                                             | 1.873241000  | -3.775007000 | 0.957787000  | 6                                                                             | -0.895015000 | 4.145246000  | 2.931151000  |
| 7                                                                             | 0.298402000  | -2.601110000 | 1.929258000  | 6                                                                             | 3.002992000  | -0.929210000 | 1.533296000  |
| 6                                                                             | 1.056177000  | 2.107215000  | 2.687880000  | 6                                                                             | 3.950323000  | -2.426524000 | 2.994191000  |
| 6                                                                             | 0.101087000  | 4.157030000  | 2.816846000  | 6                                                                             | 2.781369000  | -2.009454000 | 3.532949000  |
| 1                                                                             | -0.200680000 | 5.127168000  | 2.459861000  | 7                                                                             | -0.689570000 | 0.518343000  | 0.231131000  |
| 6                                                                             | -0.097041000 | 3.558296000  | 4.008889000  | 6                                                                             | -2.755964000 | -0.771273000 | 1.095736000  |
| 1                                                                             | -0.605505000 | 3.895984000  | 4.895726000  | 7                                                                             | -4.620299000 | -2.210752000 | 0.280372000  |
| 6                                                                             | 1.466543000  | -2.462477000 | 1.196396000  | 7                                                                             | -5.167842000 | -0.352246000 | 1.314633000  |
| 6                                                                             | 1.007532000  | -4.670138000 | 1.564050000  | 6                                                                             | -4.076724000 | -1.103798000 | 0.912933000  |
| 1                                                                             | 1.152822000  | -5.734837000 | 1.492044000  | 6                                                                             | -6.021426000 | -2.135433000 | 0.312167000  |
| 6                                                                             | 0.044795000  | -3.946021000 | 2.167306000  | 6                                                                             | -6.357458000 | -0.975045000 | 0.924483000  |
| 1                                                                             | -0.815855000 | -4.255843000 | 2.735500000  | 6                                                                             | 2.592682000  | 1.767253000  | -1.566946000 |
| 7                                                                             | -0.705221000 | 0.877195000  | 0.354436000  | 7                                                                             | 5.040630000  | 1.811398000  | -1.056918000 |
| 6                                                                             | -3.263203000 | 0.530543000  | 0.453509000  | 7                                                                             | 4.445607000  | 1.723201000  | -3.168804000 |
| 7                                                                             | -5.307568000 | -0.493145000 | -0.583739000 | 6                                                                             | 3.926285000  | 1.774727000  | -1.882152000 |
| 7                                                                             | -5.437572000 | 0.175829000  | 1.507699000  | 6                                                                             | 6.210463000  | 1.759389000  | -1.830074000 |
| 6                                                                             | -4.556538000 | 0.088246000  | 0.432734000  | 6                                                                             | 5.844287000  | 1.697787000  | -3.131703000 |
| 6                                                                             | -6.619882000 | -0.666752000 | -0.151490000 | 1                                                                             | 3.611072000  | -0.393588000 | -0.361281000 |
| 1                                                                             | -7.366706000 | -1.094526000 | -0.798567000 | 1                                                                             | 1.892954000  | 1.846401000  | -2.392711000 |
| 6                                                                             | -6.699626000 | -0.262569000 | 1.130834000  | 1                                                                             | 2.321558000  | 1.859088000  | 2.189287000  |
| 1                                                                             | -7.522121000 | -0.281312000 | 1.825690000  | 1                                                                             | -0.876805000 | -2.878229000 | 0.896219000  |
| 6                                                                             | 3.150527000  | 0.945117000  | -0.423850000 | 1                                                                             | -2.580189000 | 0.116252000  | 1.699477000  |
| 7                                                                             | 5.280679000  | -0.053005000 | 0.446675000  | 1                                                                             | -2.327428000 | -1.897378000 | -2.244882000 |
| 7                                                                             | 5.280623000  | 0.731142000  | -1.605837000 | 6                                                                             | -5.020757000 | 0.989016000  | 1.807314000  |
| 6                                                                             | 4.460850000  | 0.558057000  | -0.493956000 | 1                                                                             | -4.624235000 | 1.005176000  | 2.828994000  |

|   |              |              |              |   |              |              |              |
|---|--------------|--------------|--------------|---|--------------|--------------|--------------|
| 6 | 6.557297000  | -0.221254000 | -0.081154000 | 1 | -4.320277000 | 1.543422000  | 1.169217000  |
| 1 | 7.346044000  | -0.672312000 | 0.496378000  | 1 | -5.988311000 | 1.491315000  | 1.805638000  |
| 6 | 6.558283000  | 0.261364000  | -1.339346000 | 6 | -3.879764000 | -3.444502000 | 0.141557000  |
| 1 | 7.341658000  | 0.302889000  | -2.077068000 | 1 | -4.473694000 | -4.160544000 | -0.429146000 |
| 6 | -5.064269000 | 0.728039000  | 2.776494000  | 1 | -2.936471000 | -3.274377000 | -0.381957000 |
| 1 | -4.835469000 | 1.798544000  | 2.701885000  | 1 | -3.648133000 | -3.876348000 | 1.125553000  |
| 1 | -5.883094000 | 0.592638000  | 3.483165000  | 6 | 1.150224000  | -4.291105000 | 1.377607000  |
| 1 | -4.171113000 | 0.224540000  | 3.164189000  | 1 | 0.859643000  | -3.551222000 | 2.131878000  |
| 6 | -4.929654000 | -0.438786000 | -1.979118000 | 1 | 0.312157000  | -4.989811000 | 1.251364000  |
| 1 | -5.752504000 | -0.835384000 | -2.575656000 | 1 | 2.013442000  | -4.838972000 | 1.756164000  |
| 1 | -4.718861000 | 0.592216000  | -2.283842000 | 6 | 0.063248000  | 3.947396000  | -0.533755000 |
| 1 | -4.029653000 | -1.031615000 | -2.160211000 | 1 | -0.415895000 | 4.882852000  | -0.831377000 |
| 6 | -2.412395000 | -4.437759000 | -0.308133000 | 1 | 1.146886000  | 4.038878000  | -0.666607000 |
| 1 | -2.451603000 | -4.034409000 | 0.710218000  | 1 | -0.261531000 | 3.114144000  | -1.161762000 |
| 1 | -3.35526000  | -4.182139000 | -0.808633000 | 6 | 0.933654000  | 2.910273000  | 4.150501000  |
| 1 | -2.322913000 | -5.522663000 | -0.247163000 | 1 | 1.847964000  | 3.506136000  | 4.273950000  |
| 6 | 1.436749000  | 3.672212000  | 0.759827000  | 1 | 0.305873000  | 3.049666000  | 5.030707000  |
| 1 | 1.380796000  | 4.760257000  | 0.671899000  | 1 | 1.225850000  | 1.858973000  | 4.096452000  |
| 1 | 2.487388000  | 3.363769000  | 0.768444000  | 6 | 5.008891000  | 2.299410000  | 0.304016000  |
| 1 | 0.961297000  | 3.172285000  | -0.089414000 | 1 | 5.750852000  | 3.094510000  | 0.433423000  |
| 6 | 0.524246000  | 1.328181000  | 4.987923000  | 1 | 4.016587000  | 2.703581000  | 0.515727000  |
| 1 | 1.551700000  | 1.122189000  | 5.309455000  | 1 | 5.199441000  | 1.505583000  | 1.033545000  |
| 1 | -0.038605000 | 1.703407000  | 5.842561000  | 6 | 3.609864000  | 1.541418000  | -4.320594000 |
| 1 | 0.077331000  | 0.385391000  | 4.656836000  | 1 | 2.924747000  | 0.698620000  | -4.165379000 |
| 6 | 4.976129000  | -0.136784000 | 1.858307000  | 1 | 2.998545000  | 2.429345000  | -4.520409000 |
| 1 | 5.894814000  | 0.015299000  | 2.430278000  | 1 | 4.226601000  | 1.344366000  | -5.197126000 |
| 1 | 4.256029000  | 0.644049000  | 2.118389000  | 6 | -2.730752000 | 2.073194000  | -1.300738000 |
| 1 | 4.527621000  | -1.097720000 | 2.126588000  | 1 | -2.990885000 | 3.024474000  | -1.778181000 |
| 6 | 4.810313000  | 1.292759000  | -2.838368000 | 1 | -2.556390000 | 2.213346000  | -0.230444000 |
| 1 | 3.905753000  | 0.771716000  | -3.174194000 | 1 | -1.787014000 | 1.698358000  | -1.709539000 |
| 1 | 4.559932000  | 2.354838000  | -2.730042000 | 6 | -4.818063000 | -1.940105000 | -3.121627000 |
| 1 | 5.584313000  | 1.191786000  | -3.599212000 | 1 | -4.513004000 | -2.667043000 | -2.359599000 |
| 6 | -1.910556000 | 3.508436000  | -0.553810000 | 1 | -5.860791000 | -2.115137000 | -3.386909000 |
| 1 | -2.013687000 | 4.588304000  | -0.418573000 | 1 | -4.201870000 | -2.110246000 | -4.012171000 |
| 1 | -2.904712000 | 3.051097000  | -0.586753000 | 6 | 0.808313000  | -0.688761000 | 2.758488000  |
| 1 | -1.372372000 | 3.046365000  | 0.278700000  | 1 | 0.665051000  | 0.018933000  | 3.581627000  |
| 6 | -0.656631000 | 1.531239000  | -4.881942000 | 1 | 0.440231000  | -0.218986000 | 1.837634000  |
| 1 | -1.641377000 | 1.212336000  | -5.242565000 | 1 | 0.173201000  | -1.562097000 | 2.949095000  |
| 1 | -0.128170000 | 2.018316000  | -5.701416000 | 6 | 0.784543000  | -1.524484000 | -2.655854000 |
| 1 | -0.099701000 | 0.637640000  | -4.582759000 | 1 | 1.514279000  | -1.423077000 | -3.459456000 |
| 6 | -0.527950000 | -1.536273000 | 2.443684000  | 1 | -0.128592000 | -1.969973000 | -3.063224000 |
| 1 | -0.194100000 | -1.226107000 | 3.441245000  | 1 | 0.552566000  | -0.530061000 | -2.239528000 |
| 1 | -0.531866000 | -0.661538000 | 1.774203000  | 6 | -7.676717000 | -0.337595000 | 1.122475000  |
| 1 | -1.557314000 | -1.899816000 | 2.513791000  | 1 | -7.871620000 | -0.098251000 | 2.173861000  |
| 6 | 0.713536000  | -1.317615000 | -2.515589000 | 1 | -7.769700000 | 0.599051000  | 0.556053000  |
| 1 | 1.783996000  | -1.518223000 | -2.617930000 | 1 | -8.474307000 | -1.000613000 | 0.784029000  |
| 1 | 0.306574000  | -1.053555000 | -3.499382000 | 6 | -6.878171000 | -3.198110000 | -0.259089000 |
| 1 | 0.602485000  | -0.463347000 | -1.828591000 | 1 | -6.774897000 | -4.153032000 | 0.270125000  |
| 6 | 3.070603000  | -4.107151000 | 0.245497000  | 1 | -7.928983000 | -2.909322000 | -0.201254000 |
| 1 | 3.036836000  | -3.723480000 | -0.780855000 | 1 | -6.647529000 | -3.394705000 | -1.312929000 |
| 1 | 3.955502000  | -3.679416000 | 0.735383000  | 6 | -7.026797000 | 0.155251000  | -3.016669000 |
| 1 | 3.173823000  | -5.191849000 | 0.206778000  | 1 | -7.515615000 | -0.675575000 | -2.489751000 |
| 1 | 2.762047000  | 1.507640000  | -1.267464000 | 1 | -7.634744000 | 1.046317000  | -2.852811000 |
| 1 | 1.887431000  | 0.221255000  | 3.056480000  | 1 | -7.066816000 | -0.074475000 | -4.087668000 |
| 1 | 2.985120000  | -1.641356000 | 0.085454000  | 6 | -5.664169000 | 2.763331000  | -1.552026000 |

|   |              |              |              |   |              |              |              |
|---|--------------|--------------|--------------|---|--------------|--------------|--------------|
| 1 | -2.749123000 | -1.990645000 | -0.179158000 | 1 | -5.550878000 | 2.989841000  | -0.485112000 |
| 1 | -1.907979000 | 0.162111000  | -3.043561000 | 1 | -5.185397000 | 3.584535000  | -2.098633000 |
| 1 | -2.934638000 | 1.033425000  | 1.358205000  | 1 | -6.729150000 | 2.796282000  | -1.789001000 |
|   |              |              |              | 6 | 3.586076000  | -2.679756000 | -2.706372000 |
|   |              |              |              | 1 | 3.233895000  | -2.914047000 | -3.717831000 |
|   |              |              |              | 1 | 3.855954000  | -1.614298000 | -2.697068000 |
|   |              |              |              | 1 | 4.500007000  | -3.253249000 | -2.539342000 |
|   |              |              |              | 6 | 3.765068000  | -4.690092000 | -0.119293000 |
|   |              |              |              | 1 | 4.605915000  | -4.648293000 | -0.814071000 |
|   |              |              |              | 1 | 4.144558000  | -4.415805000 | 0.873352000  |
|   |              |              |              | 1 | 3.443966000  | -5.737599000 | -0.060393000 |
|   |              |              |              | 6 | 2.117590000  | -2.385720000 | 4.800133000  |
|   |              |              |              | 1 | 2.748556000  | -3.064888000 | 5.375553000  |
|   |              |              |              | 1 | 1.907966000  | -1.512772000 | 5.428754000  |
|   |              |              |              | 1 | 1.157037000  | -2.889072000 | 4.635441000  |
|   |              |              |              | 6 | 4.980539000  | -3.346945000 | 3.522652000  |
|   |              |              |              | 1 | 5.948588000  | -2.853155000 | 3.674564000  |
|   |              |              |              | 1 | 4.667423000  | -3.747867000 | 4.487719000  |
|   |              |              |              | 1 | 5.163195000  | -4.201528000 | 2.858791000  |
|   |              |              |              | 6 | -1.591819000 | 4.587805000  | 4.158331000  |
|   |              |              |              | 1 | -0.943607000 | 5.174646000  | 4.820070000  |
|   |              |              |              | 1 | -2.444788000 | 5.217359000  | 3.901473000  |
|   |              |              |              | 1 | -1.972866000 | 3.745470000  | 4.749072000  |
|   |              |              |              | 6 | -2.240751000 | 5.186807000  | 1.004253000  |
|   |              |              |              | 1 | -2.841017000 | 4.595101000  | 0.303471000  |
|   |              |              |              | 1 | -2.912419000 | 5.573249000  | 1.772633000  |
|   |              |              |              | 1 | -1.858724000 | 6.049852000  | 0.446512000  |
|   |              |              |              | 6 | 7.549701000  | 1.762351000  | -1.201400000 |
|   |              |              |              | 1 | 8.327377000  | 1.638244000  | -1.956400000 |
|   |              |              |              | 1 | 7.763216000  | 2.693965000  | -0.664468000 |
|   |              |              |              | 1 | 7.658898000  | 0.948561000  | -0.474526000 |
|   |              |              |              | 6 | 6.660893000  | 1.588841000  | -4.359664000 |
|   |              |              |              | 1 | 6.484118000  | 2.422060000  | -5.049738000 |
|   |              |              |              | 1 | 7.722382000  | 1.592892000  | -4.108807000 |
|   |              |              |              | 1 | 6.461362000  | 0.665120000  | -4.916974000 |
|   |              |              |              | 6 | 5.235402000  | -1.794725000 | 0.906150000  |
|   |              |              |              | 1 | 4.976908000  | -2.156332000 | -0.096984000 |
|   |              |              |              | 1 | 5.653836000  | -0.785256000 | 0.793155000  |
|   |              |              |              | 1 | 5.996104000  | -2.453286000 | 1.326451000  |

**Table S7:** Cartesian coordinates of optimized geometries of transition states for the activation of N<sub>2</sub> at M06L/6-311++G(d,p) level DFT. Atomic number followed by X, Y, Z coordinates in Å.

| ts1 |              |              |              | ts2 |              |              |              |
|-----|--------------|--------------|--------------|-----|--------------|--------------|--------------|
| 15  | -2.012109000 | 0.138798000  | -0.420113000 | 15  | 2.074900000  | -0.270176000 | -0.596846000 |
| 7   | -2.234977000 | 1.089393000  | -1.733485000 | 7   | 1.997285000  | -1.146146000 | -1.943931000 |
| 7   | -0.251383000 | 2.498233000  | -1.764579000 | 7   | -0.019135000 | -2.474853000 | -1.726564000 |
| 7   | -1.957896000 | 3.081487000  | -2.973801000 | 7   | 1.480061000  | -3.094170000 | -3.184091000 |
| 7   | -2.408601000 | -1.407903000 | -0.934924000 | 7   | 2.461072000  | 1.291571000  | -0.997251000 |
| 7   | -1.718110000 | -3.501080000 | -1.813212000 | 7   | 1.789480000  | 3.427009000  | -1.783212000 |
| 7   | -0.155110000 | -2.010606000 | -1.623768000 | 7   | 0.198756000  | 1.975399000  | -1.572600000 |
| 6   | -1.522528000 | 2.125439000  | -2.088228000 | 6   | 1.200995000  | -2.161369000 | -2.220829000 |
| 6   | 0.106840000  | 3.627621000  | -2.472690000 | 6   | -0.512381000 | -3.567996000 | -2.405376000 |
| 1   | 1.081062000  | 4.074730000  | -2.370859000 | 1   | -1.482017000 | -3.980426000 | -2.179794000 |



|            |              |              |              |            |              |              |              |
|------------|--------------|--------------|--------------|------------|--------------|--------------|--------------|
| 6          | -0.951961000 | 4.005452000  | -3.225061000 | 6          | 0.410689000  | -3.970515000 | -3.312922000 |
| 1          | -1.087796000 | 4.837021000  | -3.894296000 | 1          | 0.417042000  | -4.784673000 | -4.017038000 |
| 6          | -1.489356000 | -2.205502000 | -1.418472000 | 6          | 1.539499000  | 2.131054000  | -1.421500000 |
| 6          | -0.530051000 | -4.110436000 | -2.201616000 | 6          | 0.604102000  | 4.080496000  | -2.099053000 |
| 1          | -0.491120000 | -5.132471000 | -2.535314000 | 1          | 0.579906000  | 5.116163000  | -2.388368000 |
| 6          | 0.435267000  | -3.173178000 | -2.077619000 | 6          | -0.380709000 | 3.166451000  | -1.959838000 |
| 1          | 1.492751000  | -3.226951000 | -2.273322000 | 1          | -1.445387000 | 3.254613000  | -2.091370000 |
| 7          | 0.612179000  | 0.337844000  | -0.464022000 | 7          | -0.583585000 | -0.382887000 | -0.399858000 |
| 15         | 2.028698000  | 0.142845000  | 0.345478000  | 15         | -1.956478000 | -0.068715000 | 0.496143000  |
| 7          | 2.300669000  | 1.085064000  | 1.673692000  | 7          | -2.079594000 | -0.872342000 | 1.929461000  |
| 7          | 0.277443000  | 2.438306000  | 1.806343000  | 7          | -0.310463000 | -2.553393000 | 1.852579000  |
| 7          | 1.994136000  | 3.009459000  | 3.007281000  | 7          | -1.909071000 | -2.783481000 | 3.300582000  |
| 7          | 2.395048000  | -1.412786000 | 0.845235000  | 7          | -2.274409000 | 1.514634000  | 0.769875000  |
| 7          | 1.638804000  | -3.389391000 | 1.926356000  | 7          | -1.556964000 | 3.593749000  | 1.656319000  |
| 7          | 0.144747000  | -1.817426000 | 1.660455000  | 7          | -0.078311000 | 1.950154000  | 1.720429000  |
| 6          | 1.568392000  | 2.076939000  | 2.087754000  | 6          | -1.471893000 | -1.962191000 | 2.285382000  |
| 6          | -0.095233000 | 3.523686000  | 2.576259000  | 6          | -0.016611000 | -3.664462000 | 2.623363000  |
| 1          | -1.081786000 | 3.950490000  | 2.514998000  | 1          | 0.865057000  | -4.258057000 | 2.453210000  |
| 6          | 0.969854000  | 3.892470000  | 3.322587000  | 6          | -1.013803000 | -3.819835000 | 3.521613000  |
| 1          | 1.097879000  | 4.696375000  | 4.026251000  | 1          | -1.174122000 | -4.570147000 | 4.275856000  |
| 6          | 1.450155000  | -2.120000000 | 1.436995000  | 6          | -1.331288000 | 2.269767000  | 1.365887000  |
| 6          | 0.438062000  | -3.891672000 | 2.416519000  | 6          | -0.399705000 | 4.133217000  | 2.199863000  |
| 1          | 0.359077000  | -4.876748000 | 2.843608000  | 1          | -0.336431000 | 5.162205000  | 2.513398000  |
| 6          | -0.473267000 | -2.904806000 | 2.241094000  | 6          | 0.486313000  | 3.099406000  | 2.226467000  |
| 1          | -1.522462000 | -2.887168000 | 2.490029000  | 1          | 1.504958000  | 3.110960000  | 2.588161000  |
| 7          | -0.586939000 | 0.289224000  | 0.399258000  | 7          | 0.673754000  | -0.438162000 | 0.360117000  |
| 1          | 2.517599000  | -3.874724000 | 1.874485000  | 1          | -2.422925000 | 4.074240000  | 1.479805000  |
| 1          | -0.350050000 | -0.823712000 | 1.186016000  | 1          | 0.658026000  | 0.321474000  | 1.072618000  |
| 1          | -0.337188000 | 1.766459000  | 1.287622000  | 1          | 0.335895000  | -2.017487000 | 1.251433000  |
| 1          | 2.915543000  | 2.978249000  | 3.407952000  | 1          | -2.748700000 | -2.583258000 | 3.816065000  |
| 1          | 0.360592000  | 1.794019000  | -1.256550000 | 1          | -0.516767000 | -1.627954000 | -1.107887000 |
| 1          | -2.873631000 | 3.050748000  | -3.387852000 | 1          | 2.329700000  | -3.084670000 | -3.722832000 |
| 1          | -2.616863000 | -3.941891000 | -1.725988000 | 1          | 2.704655000  | 3.839097000  | -1.733685000 |
| 1          | 0.331798000  | -1.116493000 | -1.334612000 | 1          | -0.298255000 | 1.096813000  | -1.266149000 |
| 7          | -3.098972000 | 0.519292000  | 0.760275000  | 7          | 3.211738000  | -0.805540000 | 0.454448000  |
| 7          | -4.974413000 | -0.765540000 | -0.114941000 | 7          | 4.987555000  | 0.787559000  | -0.032743000 |
| 7          | -5.310149000 | 0.516293000  | 1.599648000  | 7          | 5.391422000  | -0.812068000 | 1.367671000  |
| 6          | -4.330170000 | 0.112954000  | 0.721023000  | 6          | 4.405361000  | -0.301727000 | 0.558807000  |
| 6          | -6.294244000 | -0.931085000 | 0.268991000  | 6          | 6.281401000  | 0.963210000  | 0.425612000  |
| 1          | -6.969276000 | -1.584091000 | -0.256633000 | 1          | 6.908590000  | 1.768677000  | 0.085226000  |
| 6          | -6.510613000 | -0.126506000 | 1.332102000  | 6          | 6.540058000  | -0.036798000 | 1.295869000  |
| 1          | -7.403140000 | 0.059544000  | 1.902945000  | 1          | 7.429143000  | -0.272469000 | 1.853321000  |
| 1          | -4.401630000 | -1.317870000 | -0.754006000 | 1          | 4.392828000  | 1.390635000  | -0.602604000 |
| 1          | -5.122904000 | 1.169967000  | 2.340211000  | 1          | 5.241111000  | -1.623473000 | 1.942341000  |
| 7          | 3.122473000  | 0.536140000  | -0.826304000 | 7          | -3.095410000 | -0.649426000 | -0.551614000 |
| 7          | 4.955945000  | -0.826625000 | 0.015933000  | 7          | -4.804101000 | 1.022164000  | -0.100432000 |
| 7          | 5.337152000  | 0.496925000  | -1.658801000 | 7          | -5.294473000 | -0.618704000 | -1.429438000 |
| 6          | 4.341048000  | 0.095840000  | -0.795378000 | 6          | -4.272421000 | -0.112195000 | -0.657823000 |
| 6          | 6.271344000  | -1.018904000 | -0.368552000 | 6          | -6.098900000 | 1.224730000  | -0.541056000 |
| 1          | 6.925031000  | -1.706858000 | 0.139379000  | 1          | -6.691862000 | 2.064015000  | -0.220626000 |
| 6          | 6.517052000  | -0.189510000 | -1.406201000 | 6          | -6.413300000 | 0.201156000  | -1.365543000 |
| 1          | 7.417762000  | -0.012317000 | -1.967015000 | 1          | -7.323372000 | -0.024708000 | -1.892702000 |
| 1          | 4.358648000  | -1.376807000 | 0.637838000  | 1          | -4.158027000 | 1.621296000  | 0.427666000  |
| 1          | 5.173388000  | 1.178933000  | -2.378848000 | 1          | -5.189061000 | -1.461356000 | -1.967264000 |
| <b>ts3</b> |              |              |              | <b>ts4</b> |              |              |              |
| 15         | -1.984401000 | 0.151850000  | -0.739249000 | 15         | -1.783781000 | 0.138772000  | -1.288887000 |

|    |              |              |              |    |              |              |              |
|----|--------------|--------------|--------------|----|--------------|--------------|--------------|
| 7  | -1.622668000 | 0.985199000  | -2.053111000 | 7  | -1.230007000 | 1.004023000  | -2.480109000 |
| 7  | -0.110721000 | 2.755948000  | -1.308481000 | 7  | 0.152851000  | 2.771057000  | -1.561197000 |
| 7  | -1.155093000 | 2.955749000  | -3.244649000 | 7  | -1.052081000 | 3.200771000  | -3.359462000 |
| 7  | -2.319834000 | -1.408010000 | -1.122927000 | 7  | -1.834413000 | -1.453585000 | -1.531921000 |
| 7  | -1.540617000 | -3.465248000 | -2.014019000 | 7  | -0.759742000 | -3.448537000 | -2.216479000 |
| 7  | 0.007900000  | -1.992274000 | -1.516888000 | 7  | 0.577726000  | -1.782259000 | -1.668958000 |
| 6  | -1.002064000 | 2.166107000  | -2.131975000 | 6  | -0.736036000 | 2.258649000  | -2.419318000 |
| 6  | 0.287816000  | 3.922164000  | -1.932901000 | 6  | 0.387362000  | 4.064152000  | -1.969926000 |
| 1  | 1.008768000  | 4.583829000  | -1.472937000 | 1  | 1.070611000  | 4.706698000  | -1.434460000 |
| 6  | -0.340381000 | 4.068139000  | -3.130003000 | 6  | -0.342595000 | 4.356522000  | -3.082343000 |
| 1  | -0.294615000 | 4.831612000  | -3.888625000 | 1  | -0.424648000 | 5.242395000  | -3.689853000 |
| 6  | -1.323615000 | -2.202029000 | -1.531112000 | 6  | -0.702912000 | -2.145535000 | -1.802371000 |
| 6  | -0.321713000 | -4.066274000 | -2.295619000 | 6  | 0.531747000  | -3.929411000 | -2.349487000 |
| 1  | -0.250429000 | -5.069622000 | -2.679698000 | 1  | 0.740914000  | -4.936538000 | -2.669010000 |
| 6  | 0.616740000  | -3.138183000 | -1.978589000 | 6  | 1.332058000  | -2.883411000 | -2.006686000 |
| 1  | 1.691565000  | -3.216137000 | -2.042827000 | 1  | 2.411838000  | -2.851824000 | -1.989244000 |
| 7  | 0.619214000  | 0.154357000  | -0.244386000 | 7  | 0.717840000  | 0.499819000  | -0.147468000 |
| 15 | 2.013433000  | 0.079847000  | 0.917036000  | 15 | 1.867328000  | 0.256694000  | 1.330136000  |
| 7  | 1.597456000  | 0.885907000  | 2.236803000  | 7  | 1.239186000  | 1.029046000  | 2.551480000  |
| 7  | 0.486271000  | 2.920437000  | 1.441040000  | 7  | -0.571537000 | 2.418793000  | 1.753219000  |
| 7  | 0.972942000  | 2.732660000  | 3.539571000  | 7  | 0.537234000  | 3.077277000  | 3.524585000  |
| 7  | 2.389799000  | -1.458315000 | 1.148159000  | 7  | 2.069969000  | -1.325434000 | 1.471616000  |
| 7  | 1.760875000  | -3.594641000 | 1.978421000  | 7  | 1.239906000  | -3.448078000 | 2.118700000  |
| 7  | 0.153054000  | -2.081242000 | 1.865065000  | 7  | -0.285243000 | -1.921143000 | 1.660393000  |
| 6  | 1.058761000  | 2.078102000  | 2.340717000  | 6  | 0.450822000  | 2.109407000  | 2.565656000  |
| 6  | 0.024919000  | 4.055583000  | 2.077202000  | 6  | -1.121693000 | 3.598137000  | 2.200243000  |
| 1  | -0.483664000 | 4.833464000  | 1.533648000  | 1  | -1.955282000 | 4.057167000  | 1.692588000  |
| 6  | 0.329184000  | 3.950240000  | 3.390267000  | 6  | -0.451172000 | 4.023761000  | 3.303142000  |
| 1  | 0.156570000  | 4.616812000  | 4.216461000  | 1  | -0.574240000 | 4.884989000  | 3.937460000  |
| 6  | 1.448261000  | -2.302117000 | 1.657337000  | 6  | 1.025755000  | -2.149175000 | 1.750437000  |
| 6  | 0.603815000  | -4.225317000 | 2.405591000  | 6  | 0.012844000  | -4.071569000 | 2.263716000  |
| 1  | 0.592966000  | -5.258194000 | 2.711642000  | 1  | -0.075947000 | -5.106139000 | 2.550097000  |
| 6  | -0.365047000 | -3.270626000 | 2.322594000  | 6  | -0.905824000 | -3.108190000 | 1.976541000  |
| 1  | -1.413197000 | -3.368457000 | 2.565171000  | 1  | -1.982703000 | -3.194500000 | 1.980698000  |
| 7  | -0.680921000 | 0.318525000  | 0.396937000  | 7  | -0.697167000 | 0.424421000  | 0.179732000  |
| 1  | 2.683528000  | -3.993193000 | 1.928323000  | 1  | 2.147949000  | -3.850497000 | 2.281338000  |
| 1  | -0.712135000 | -0.425141000 | 1.111387000  | 1  | -0.780843000 | -0.415013000 | 0.810926000  |
| 1  | 0.256342000  | 2.697161000  | 0.446654000  | 1  | -0.854967000 | 1.434534000  | 0.839770000  |
| 1  | 1.319654000  | 2.323668000  | 4.390854000  | 1  | 1.232807000  | 3.076427000  | 4.252162000  |
| 1  | 0.746135000  | 1.000551000  | -0.820938000 | 1  | 0.820033000  | 1.445601000  | -0.615675000 |
| 1  | -1.759365000 | 2.711571000  | -4.011795000 | 1  | -1.706717000 | 3.045925000  | -4.108482000 |
| 1  | -2.454165000 | -3.863238000 | -2.149004000 | 1  | -1.613380000 | -3.938209000 | -2.426454000 |
| 1  | 0.530786000  | -0.829752000 | -0.906426000 | 1  | 0.899172000  | -0.290274000 | -0.837959000 |
| 7  | -3.210017000 | 0.751244000  | 0.168896000  | 7  | -3.176383000 | 0.658881000  | -0.604070000 |
| 7  | -4.830787000 | -1.038530000 | -0.135645000 | 7  | -4.130481000 | -1.509283000 | -0.048164000 |
| 7  | -5.423004000 | 0.707389000  | 0.999508000  | 7  | -5.185921000 | 0.269471000  | 0.585081000  |
| 6  | -4.363827000 | 0.169391000  | 0.307948000  | 6  | -4.060363000 | -0.145233000 | -0.079059000 |
| 6  | -6.131118000 | -1.247008000 | 0.285197000  | 6  | -5.267898000 | -1.926752000 | 0.617997000  |
| 1  | -6.679031000 | -2.140794000 | 0.041910000  | 1  | -5.508973000 | -2.967322000 | 0.748964000  |
| 6  | -6.507480000 | -0.158512000 | 0.992250000  | 6  | -5.929424000 | -0.818839000 | 1.019287000  |
| 1  | -7.437369000 | 0.079066000  | 1.477817000  | 1  | -6.848629000 | -0.705851000 | 1.566124000  |
| 1  | -4.169049000 | -1.637152000 | -0.640142000 | 1  | -3.388734000 | -2.027606000 | -0.530195000 |
| 1  | -5.364250000 | 1.605945000  | 1.446911000  | 1  | -5.386056000 | 1.243007000  | 0.739719000  |
| 7  | 3.131332000  | 0.852684000  | 0.014762000  | 7  | 3.184979000  | 0.959842000  | 0.680548000  |
| 7  | 4.597615000  | -1.034047000 | -0.430969000 | 7  | 4.271061000  | -1.055010000 | -0.147111000 |
| 7  | 5.089952000  | 0.879364000  | -1.312546000 | 7  | 5.132625000  | 0.859956000  | -0.660514000 |
| 6  | 4.166286000  | 0.258309000  | -0.514818000 | 6  | 4.094561000  | 0.287037000  | 0.022839000  |

|   |             |              |              |   |             |              |              |
|---|-------------|--------------|--------------|---|-------------|--------------|--------------|
| 6 | 5.755861000 | -1.210537000 | -1.166297000 | 6 | 5.387139000 | -1.307087000 | -0.923603000 |
| 1 | 6.258103000 | -2.159968000 | -1.229695000 | 1 | 5.699373000 | -2.305713000 | -1.174992000 |
| 6 | 6.066744000 | -0.018158000 | -1.720510000 | 6 | 5.927208000 | -0.112186000 | -1.250278000 |
| 1 | 6.884055000 | 0.272084000  | -2.356361000 | 1 | 6.792682000 | 0.132954000  | -1.839748000 |
| 1 | 4.035266000 | -1.684474000 | 0.126320000  | 1 | 3.606579000 | -1.682059000 | 0.316452000  |
| 1 | 5.009980000 | 1.849182000  | -1.567932000 | 1 | 5.233667000 | 1.857994000  | -0.738998000 |

**Table S8:** Cartesian coordinates of optimized geometries of products for the activation of N<sub>2</sub> at M06L/6-311++G(d,p) level DFT. Atomic number followed by X, Y, Z coordinates in Å.

| $(\text{Im}^{\text{a}}\text{N}')_3\text{P}-\text{NNH}-\text{P}(\text{Im}^{\text{a}}\text{N}')_3$ |              |              |              | $(\text{Im}^{\text{a}}\text{N}')_3\text{P}-\text{HNNH}-\text{P}(\text{Im}^{\text{a}}\text{N}')_3$ |              |              |              |
|--------------------------------------------------------------------------------------------------|--------------|--------------|--------------|---------------------------------------------------------------------------------------------------|--------------|--------------|--------------|
| 15                                                                                               | 2.074366000  | -0.271699000 | -0.564902000 | 15                                                                                                | 2.005062000  | -0.076874000 | -0.578150000 |
| 7                                                                                                | 2.042518000  | -1.203793000 | -1.883234000 | 7                                                                                                 | 1.828230000  | -0.876859000 | -1.947004000 |
| 7                                                                                                | 0.036615000  | -2.566361000 | -1.734352000 | 7                                                                                                 | 0.487895000  | -2.800850000 | -1.249793000 |
| 7                                                                                                | 1.611905000  | -3.187632000 | -3.092408000 | 7                                                                                                 | 1.567087000  | -2.866068000 | -3.176260000 |
| 7                                                                                                | 2.455579000  | 1.272607000  | -1.023457000 | 7                                                                                                 | 2.410001000  | 1.497325000  | -0.950565000 |
| 7                                                                                                | 1.780156000  | 3.388031000  | -1.859605000 | 7                                                                                                 | 1.772519000  | 3.650837000  | -1.708159000 |
| 7                                                                                                | 0.192768000  | 1.936835000  | -1.616400000 | 7                                                                                                 | 0.162035000  | 2.216021000  | -1.553585000 |
| 6                                                                                                | 1.278421000  | -2.229134000 | -2.170710000 | 6                                                                                                 | 1.317226000  | -2.114864000 | -2.055753000 |
| 6                                                                                                | -0.410622000 | -3.685361000 | -2.405413000 | 6                                                                                                 | 0.224274000  | -3.994840000 | -1.889281000 |
| 1                                                                                                | -1.383136000 | -4.106730000 | -2.215661000 | 1                                                                                                 | -0.429621000 | -4.733223000 | -1.446261000 |
| 6                                                                                                | 0.566678000  | -4.087651000 | -3.250829000 | 6                                                                                                 | 0.876474000  | -4.061265000 | -3.081690000 |
| 1                                                                                                | 0.622666000  | -4.919951000 | -3.930479000 | 1                                                                                                 | 0.918857000  | -4.815301000 | -3.849924000 |
| 6                                                                                                | 1.531164000  | 2.101078000  | -1.467870000 | 6                                                                                                 | 1.506868000  | 2.347820000  | -1.372760000 |
| 6                                                                                                | 0.593132000  | 4.031072000  | -2.191067000 | 6                                                                                                 | 0.602486000  | 4.322534000  | -2.039513000 |
| 1                                                                                                | 0.566632000  | 5.059984000  | -2.503558000 | 1                                                                                                 | 0.595296000  | 5.361382000  | -2.317705000 |
| 6                                                                                                | -0.388908000 | 3.116973000  | -2.031088000 | 6                                                                                                 | -0.396463000 | 3.420626000  | -1.933964000 |
| 1                                                                                                | -1.453936000 | 3.199082000  | -2.164618000 | 1                                                                                                 | -1.455732000 | 3.526807000  | -2.091787000 |
| 7                                                                                                | -0.584067000 | -0.378233000 | -0.408303000 | 7                                                                                                 | -0.639187000 | -0.184158000 | -0.374344000 |
| 15                                                                                               | -1.957316000 | -0.054094000 | 0.463789000  | 15                                                                                                | -2.055802000 | -0.115171000 | 0.633707000  |
| 7                                                                                                | -2.119179000 | -0.857467000 | 1.899819000  | 7                                                                                                 | -1.790209000 | -0.847890000 | 2.055067000  |
| 7                                                                                                | -0.342104000 | -2.532158000 | 1.857428000  | 7                                                                                                 | -0.474943000 | -2.827525000 | 1.431124000  |
| 7                                                                                                | -1.955543000 | -2.753177000 | 3.292976000  | 7                                                                                                 | -1.190058000 | -2.624409000 | 3.462702000  |
| 7                                                                                                | -2.289149000 | 1.530123000  | 0.744297000  | 7                                                                                                 | -2.549648000 | 1.409603000  | 0.832888000  |
| 7                                                                                                | -1.563472000 | 3.624037000  | 1.586543000  | 7                                                                                                 | -2.125234000 | 3.570637000  | 1.723476000  |
| 7                                                                                                | -0.086857000 | 1.979278000  | 1.674814000  | 7                                                                                                 | -0.402979000 | 2.184378000  | 1.667086000  |
| 6                                                                                                | -1.511348000 | -1.939110000 | 2.273130000  | 6                                                                                                 | -1.190310000 | -1.997326000 | 2.242631000  |
| 6                                                                                                | -0.048407000 | -3.629056000 | 2.649920000  | 6                                                                                                 | -0.013025000 | -3.915383000 | 2.145356000  |
| 1                                                                                                | 0.838872000  | -4.219548000 | 2.498531000  | 1                                                                                                 | 0.598393000  | -4.669864000 | 1.680181000  |
| 6                                                                                                | -1.054439000 | -3.778817000 | 3.538935000  | 6                                                                                                 | -0.459351000 | -3.800878000 | 3.416040000  |
| 1                                                                                                | -1.218344000 | -4.520981000 | 4.300542000  | 1                                                                                                 | -0.333808000 | -4.437420000 | 4.273899000  |
| 6                                                                                                | -1.342256000 | 2.293548000  | 1.319458000  | 6                                                                                                 | -1.703942000 | 2.306773000  | 1.396686000  |
| 6                                                                                                | -0.401144000 | 4.172914000  | 2.109943000  | 6                                                                                                 | -1.041871000 | 4.276628000  | 2.224601000  |
| 1                                                                                                | -0.334454000 | 5.207496000  | 2.403876000  | 1                                                                                                 | -1.125139000 | 5.299602000  | 2.552536000  |
| 6                                                                                                | 0.482887000  | 3.138008000  | 2.152754000  | 6                                                                                                 | -0.000976000 | 3.398914000  | 2.173682000  |
| 1                                                                                                | 1.503534000  | 3.154974000  | 2.508992000  | 1                                                                                                 | 1.022880000  | 3.568320000  | 2.475365000  |
| 7                                                                                                | 0.663450000  | -0.426016000 | 0.367892000  | 7                                                                                                 | 0.609736000  | -0.232305000 | 0.390440000  |
| 1                                                                                                | -2.426203000 | 4.104565000  | 1.395150000  | 1                                                                                                 | -3.075585000 | 3.893642000  | 1.652614000  |
| 1                                                                                                | 0.648028000  | 0.342634000  | 1.072816000  | 1                                                                                                 | 0.538587000  | 0.521881000  | 1.091183000  |
| 1                                                                                                | 0.313342000  | -1.991679000 | 1.270444000  | 1                                                                                                 | -0.145539000 | -2.619627000 | 0.466699000  |
| 1                                                                                                | -2.796805000 | -2.546321000 | 3.803060000  | 1                                                                                                 | -1.647771000 | -2.218937000 | 4.261280000  |
| 1                                                                                                | -0.498017000 | -1.823040000 | -1.175240000 | 1                                                                                                 | -0.676244000 | -1.065811000 | -0.896301000 |
| 1                                                                                                | 2.489581000  | -3.180225000 | -3.583688000 | 1                                                                                                 | 2.157988000  | -2.554964000 | -3.929429000 |
| 1                                                                                                | 2.693897000  | 3.804199000  | -1.817302000 | 1                                                                                                 | 2.693620000  | 4.047436000  | -1.646708000 |
| 1                                                                                                | -0.301783000 | 1.057786000  | -1.284192000 | 1                                                                                                 | -0.350267000 | 1.356077000  | -1.279627000 |

|                                                                                           |              |              |              |                                                                                                       |              |              |              |
|-------------------------------------------------------------------------------------------|--------------|--------------|--------------|-------------------------------------------------------------------------------------------------------|--------------|--------------|--------------|
| 7                                                                                         | 3.203971000  | -0.768272000 | 0.511232000  | 7                                                                                                     | 3.136456000  | -0.629339000 | 0.472830000  |
| 7                                                                                         | 4.968784000  | 0.830591000  | 0.002929000  | 7                                                                                                     | 4.959498000  | 0.886855000  | -0.084588000 |
| 7                                                                                         | 5.367411000  | -0.719065000 | 1.459758000  | 7                                                                                                     | 5.345981000  | -0.727919000 | 1.304275000  |
| 6                                                                                         | 4.389792000  | -0.246243000 | 0.619027000  | 6                                                                                                     | 4.351959000  | -0.177775000 | 0.530223000  |
| 6                                                                                         | 6.252150000  | 1.036986000  | 0.477735000  | 6                                                                                                     | 6.276316000  | 1.006027000  | 0.324368000  |
| 1                                                                                         | 6.875412000  | 1.839170000  | 0.122711000  | 1                                                                                                     | 6.925457000  | 1.782727000  | -0.040997000 |
| 6                                                                                         | 6.507462000  | 0.068299000  | 1.383715000  | 6                                                                                                     | 6.523695000  | -0.004428000 | 1.186129000  |
| 1                                                                                         | 7.389287000  | -0.138466000 | 1.963697000  | 1                                                                                                     | 7.422617000  | -0.278000000 | 1.709597000  |
| 1                                                                                         | 4.376184000  | 1.407182000  | -0.596292000 | 1                                                                                                     | 4.373049000  | 1.515340000  | -0.633853000 |
| 1                                                                                         | 5.214760000  | -1.510612000 | 2.060978000  | 1                                                                                                     | 5.184673000  | -1.540323000 | 1.874606000  |
| 7                                                                                         | -3.097128000 | -0.625189000 | -0.593658000 | 7                                                                                                     | -3.096453000 | -0.942001000 | -0.326013000 |
| 7                                                                                         | -4.825615000 | 1.004752000  | -0.068421000 | 7                                                                                                     | -4.876368000 | 0.709032000  | -0.428169000 |
| 7                                                                                         | -5.310644000 | -0.606378000 | -1.436078000 | 7                                                                                                     | -5.170723000 | -1.183130000 | -1.438812000 |
| 6                                                                                         | -4.283855000 | -0.104729000 | -0.666006000 | 6                                                                                                     | -4.263608000 | -0.487486000 | -0.679151000 |
| 6                                                                                         | -6.129329000 | 1.199196000  | -0.485287000 | 6                                                                                                     | -6.121758000 | 0.756111000  | -1.027948000 |
| 1                                                                                         | -6.730469000 | 2.019752000  | -0.132962000 | 1                                                                                                     | -6.766752000 | 1.613952000  | -0.949514000 |
| 6                                                                                         | -6.440860000 | 0.193792000  | -1.333061000 | 6                                                                                                     | -6.311572000 | -0.423698000 | -1.658811000 |
| 1                                                                                         | -7.355781000 | -0.032289000 | -1.851766000 | 1                                                                                                     | -7.145219000 | -0.790787000 | -2.230668000 |
| 1                                                                                         | -4.176739000 | 1.604601000  | 0.456958000  | 1                                                                                                     | -4.340817000 | 1.407563000  | 0.097676000  |
| 1                                                                                         | -5.201147000 | -1.432862000 | -1.997434000 | 1                                                                                                     | -4.981810000 | -2.110398000 | -1.779458000 |
| <b>(Im<sup>a</sup>N'')<sub>3</sub>P-H<sub>2</sub>NNH-P(Im<sup>a</sup>N'')<sub>3</sub></b> |              |              |              | <b>(Im<sup>a</sup>N'')<sub>3</sub>P-H<sub>2</sub>NNH<sub>2</sub>-P(Im<sup>a</sup>N'')<sub>3</sub></b> |              |              |              |
| 15                                                                                        | -1.629971000 | -0.174503000 | -1.420152000 | 15                                                                                                    | -1.854572000 | 0.166197000  | -1.328827000 |
| 7                                                                                         | -1.356559000 | 0.802552000  | -2.638097000 | 7                                                                                                     | -1.243772000 | 0.956766000  | -2.535643000 |
| 7                                                                                         | -0.204314000 | 2.746380000  | -1.722961000 | 7                                                                                                     | 0.227913000  | 2.683548000  | -1.693013000 |
| 7                                                                                         | -1.417465000 | 2.975926000  | -3.554456000 | 7                                                                                                     | -1.034328000 | 3.146054000  | -3.442209000 |
| 7                                                                                         | -1.279200000 | -1.727338000 | -1.748277000 | 7                                                                                                     | -1.948905000 | -1.429233000 | -1.461956000 |
| 7                                                                                         | 0.170983000  | -3.190345000 | -2.920962000 | 7                                                                                                     | -0.971432000 | -3.477793000 | -2.138080000 |
| 7                                                                                         | 1.141273000  | -1.496306000 | -1.895575000 | 7                                                                                                     | 0.442986000  | -1.854891000 | -1.657741000 |
| 6                                                                                         | -1.007188000 | 2.097604000  | -2.584178000 | 6                                                                                                     | -0.708893000 | 2.200152000  | -2.511199000 |
| 6                                                                                         | -0.124101000 | 4.047601000  | -2.169129000 | 6                                                                                                     | 0.483091000  | 3.968910000  | -2.111355000 |
| 1                                                                                         | 0.468325000  | 4.784592000  | -1.645676000 | 1                                                                                                     | 1.203850000  | 4.591036000  | -1.601891000 |
| 6                                                                                         | -0.862374000 | 4.218072000  | -3.300584000 | 6                                                                                                     | -0.281155000 | 4.280909000  | -3.195323000 |
| 1                                                                                         | -1.037034000 | 5.069803000  | -3.936832000 | 1                                                                                                     | -0.360887000 | 5.167423000  | -3.802148000 |
| 6                                                                                         | -0.042218000 | -2.071003000 | -2.159916000 | 6                                                                                                     | -0.851082000 | -2.172152000 | -1.751405000 |
| 6                                                                                         | 1.528573000  | -3.313507000 | -3.168093000 | 6                                                                                                     | 0.296047000  | -4.010543000 | -2.295555000 |
| 1                                                                                         | 1.937240000  | -4.120553000 | -3.753251000 | 1                                                                                                     | 0.457428000  | -5.030622000 | -2.601375000 |
| 6                                                                                         | 2.100370000  | -2.258040000 | -2.526356000 | 6                                                                                                     | 1.145234000  | -2.989664000 | -1.995276000 |
| 1                                                                                         | 3.148541000  | -1.999043000 | -2.476424000 | 1                                                                                                     | 2.225305000  | -2.999073000 | -2.009049000 |
| 7                                                                                         | 0.664435000  | 0.628268000  | -0.233887000 | 7                                                                                                     | 0.704634000  | 0.462625000  | -0.168313000 |
| 15                                                                                        | 1.696351000  | 0.570564000  | 1.288572000  | 15                                                                                                    | 1.854339000  | 0.164734000  | 1.328554000  |
| 7                                                                                         | 1.248827000  | 1.771628000  | 2.237770000  | 7                                                                                                     | 1.243218000  | 0.954019000  | 2.536041000  |
| 7                                                                                         | -0.760199000 | 2.853666000  | 1.382056000  | 7                                                                                                     | -0.228513000 | 2.681629000  | 1.695295000  |
| 7                                                                                         | 0.328610000  | 3.801070000  | 2.989365000  | 7                                                                                                     | 1.035372000  | 3.143163000  | 3.443535000  |
| 7                                                                                         | 1.649412000  | -0.908276000 | 1.883824000  | 7                                                                                                     | 1.948569000  | -1.430829000 | 1.459950000  |
| 7                                                                                         | 0.731758000  | -2.410028000 | 3.476587000  | 7                                                                                                     | 0.971148000  | -3.479318000 | 2.136453000  |
| 7                                                                                         | -0.720448000 | -1.177435000 | 2.361568000  | 7                                                                                                     | -0.443312000 | -1.856593000 | 1.655626000  |
| 6                                                                                         | 0.335055000  | 2.705169000  | 2.170581000  | 6                                                                                                     | 0.708817000  | 2.197655000  | 2.512524000  |
| 6                                                                                         | -1.422869000 | 4.024293000  | 1.689843000  | 6                                                                                                     | -0.482900000 | 3.966943000  | 2.114218000  |
| 1                                                                                         | -2.308313000 | 4.327375000  | 1.158836000  | 1                                                                                                     | -1.203865000 | 4.589461000  | 1.605528000  |
| 6                                                                                         | -0.749879000 | 4.622969000  | 2.697769000  | 6                                                                                                     | 0.282330000  | 4.278319000  | 3.197678000  |
| 1                                                                                         | -0.933067000 | 5.541448000  | 3.226387000  | 1                                                                                                     | 0.362836000  | 5.164602000  | 3.804736000  |
| 6                                                                                         | 0.573647000  | -1.430949000 | 2.534919000  | 6                                                                                                     | 0.850746000  | -2.173779000 | 1.749478000  |
| 6                                                                                         | -0.522355000 | -2.790424000 | 3.922771000  | 6                                                                                                     | -0.296308000 | -4.011995000 | 2.294277000  |
| 1                                                                                         | -0.658516000 | -3.556814000 | 4.667739000  | 1                                                                                                     | -0.457666000 | -5.032024000 | 2.600277000  |
| 6                                                                                         | -1.395195000 | -2.015794000 | 3.218830000  | 6                                                                                                     | -1.145528000 | -2.991262000 | 1.993588000  |
| 1                                                                                         | -2.474764000 | -2.016836000 | 3.265149000  | 1                                                                                                     | -2.225597000 | -3.000730000 | 2.007327000  |

|   |              |              |              |   |              |              |              |
|---|--------------|--------------|--------------|---|--------------|--------------|--------------|
| 7 | -0.762547000 | 0.443646000  | -0.014814000 | 7 | -0.705118000 | 0.462331000  | 0.168189000  |
| 1 | 1.622059000  | -2.738053000 | 3.813256000  | 1 | 1.849097000  | -3.940548000 | 2.307705000  |
| 1 | -0.888927000 | -0.188249000 | 0.799208000  | 1 | -0.828346000 | -0.346399000 | 0.845516000  |
| 1 | -1.029868000 | 2.133606000  | 0.687438000  | 1 | -0.846576000 | 1.388444000  | 0.664686000  |
| 1 | 1.049269000  | 3.959414000  | 3.673040000  | 1 | 1.729196000  | 3.010051000  | 4.160869000  |
| 1 | 0.706780000  | 1.557820000  | -0.737161000 | 1 | 0.846040000  | 1.389321000  | -0.663619000 |
| 1 | -2.028931000 | 2.717752000  | -4.311254000 | 1 | -1.727563000 | 3.013369000  | -4.160190000 |
| 1 | -0.571206000 | -3.743289000 | -3.316333000 | 1 | -1.849371000 | -3.939375000 | -2.308418000 |
| 1 | 1.029115000  | -0.136581000 | -0.892874000 | 1 | 0.827985000  | -0.345201000 | -0.846623000 |
| 7 | -3.141931000 | -0.096576000 | -0.776735000 | 7 | -3.200009000 | 0.782584000  | -0.644573000 |
| 7 | -3.371143000 | -2.437899000 | -0.147924000 | 7 | -4.153802000 | -1.301223000 | 0.173479000  |
| 7 | -4.928822000 | -1.057188000 | 0.442624000  | 7 | -5.125636000 | 0.553093000  | 0.713436000  |
| 6 | -3.727585000 | -1.119226000 | -0.222504000 | 6 | -4.060584000 | 0.051159000  | 0.014921000  |
| 6 | -4.323568000 | -3.168168000 | 0.535914000  | 6 | -5.245822000 | -1.627982000 | 0.956283000  |
| 1 | -4.225439000 | -4.226651000 | 0.703883000  | 1 | -5.495074000 | -2.646073000 | 1.199945000  |
| 6 | -5.298908000 | -2.310828000 | 0.910810000  | 6 | -5.854670000 | -0.471324000 | 1.299386000  |
| 1 | -6.208205000 | -2.474400000 | 1.461715000  | 1 | -6.728546000 | -0.285235000 | 1.898024000  |
| 1 | -2.515548000 | -2.719514000 | -0.637156000 | 1 | -3.457338000 | -1.883009000 | -0.301882000 |
| 1 | -5.428809000 | -0.192632000 | 0.559041000  | 1 | -5.288505000 | 1.542229000  | 0.799984000  |
| 7 | 3.130162000  | 0.888005000  | 0.597660000  | 7 | 3.199573000  | 0.781820000  | 0.644679000  |
| 7 | 3.913732000  | -1.409299000 | 0.384097000  | 7 | 4.154342000  | -1.301372000 | -0.173753000 |
| 7 | 5.074050000  | 0.163068000  | -0.536667000 | 7 | 5.125773000  | 0.553453000  | -0.712691000 |
| 6 | 3.941032000  | -0.059476000 | 0.196715000  | 6 | 4.060669000  | 0.050895000  | -0.014725000 |
| 6 | 4.994547000  | -2.011467000 | -0.231312000 | 6 | 5.246486000  | -1.627472000 | -0.956672000 |
| 1 | 5.145513000  | -3.076543000 | -0.211984000 | 1 | 5.496134000  | -2.645400000 | -1.200602000 |
| 6 | 5.724968000  | -1.031763000 | -0.808470000 | 6 | 5.855063000  | -0.470486000 | -1.299160000 |
| 1 | 6.635153000  | -1.073112000 | -1.379806000 | 1 | 6.729069000  | -0.283897000 | -1.897453000 |
| 1 | 3.130562000  | -1.808257000 | 0.905803000  | 1 | 3.457611000  | -1.883531000 | 0.300785000  |
| 1 | 5.334371000  | 1.082772000  | -0.851102000 | 1 | 5.288122000  | 1.542687000  | -0.799106000 |
